# Supplementary material for: The Paradox of Music-Evoked Sadness: An Online Survey
Source: PLoS One. 2014 Oct 20;9(10):e110490. doi: 10.1371/journal.pone.0110490 (PMC4203803; doi:10.1371/journal.pone.0110490)
Supplement: Dataset S1 — Original dataset collected though an online platform for the sad music survey. (XLSX) [file pone.0110490.s010.xlsx]

## Sheet: Sheet1
Age	Gender	Current Residence	Native Country	Musical Training	Musical Engagement	Genre	Instrument	Frequency	Situation Importance	Situation Example	Mood-congruent Liking Sad Music	Mood-incongruent Liking Sad Music	GEMS: Sadness	GEMS: Tenderness	GEMS: Nostalgia	GEMS: Tension	GEMS: Peacefulness	GEMS: Joyful Activation	GEMS: Transcendence	GEMS: Wonder	GEMS: Power	Any Feeling	Imagination	Memory	Contagion1	Contagion2	SocialFunctions	Appraisal1	Appraisal2	Mood Enhancement	Catharsis/Venting	Savoring Feeling	Understanding Feelings	Emotional Assurance	Expressive Potency1	Expressive Potency2	Expressive Potency3	Emotional Communion	Empathic Responses	FS	PT	EC	PD	Extraversion	Agreeableness	Conscientiousness	Emotional Stability	Openness to Experience
28	2	US	US	4	1	I do listen to all genres, but the most I guess would be indie and folk	-99	4	6	Being in a pretty natural landscape, relaxing, enjoying the quiet setting by myself wherever I am, reading, creating and writing	4	6	1	0	1	0	1	1	1	1	1	0	2	6	6	7	7	7	5	6	7	4	5	5	3	3	3	5	6	18	20	23	11	4	5	2	3.5	6.5
22	2	Italy	Italy	1	1	Rock, Classical, Electronic	Harp	5	5	When I feel nostalgic, or simply when I want to think freely and to be creatively inspired by the music.	6	4	0	1	1	0	1	0	1	1	0	0	-77	-77	-77	-77	-77	-77	-77	6	6	7	7	7	6	6	6	7	7	27	23	23	13	4	6.5	3	4	7
24	2	Germany	Germany	3	2	Pop, Rock, World Music (including Turkish, Arabic, Hindi), Indie	Voice	4	5	When you feel empty and you need the sad music to get out the pain	5	2	0	0	1	0	0	0	1	1	0	0	-77	-77	-77	-77	-77	-77	-77	7	7	5	7	6	7	7	6	5	5	20	15	28	15	5.5	5	4.5	4.5	6.5
23	2	UK	UK	4	1	Indie/Alternative	-99	1	1	I don't tend to seek out sad music.	1	2	1	1	1	1	0	0	0	0	0	0	6	6	6	6	6	5	6	3	3	3	4	4	5	5	4	5	4	24	20	24	23	2	4.5	5.5	2.5	6
22	2	UK	UK	4	2	pop, inde folk	-99	3	7	If i am missing someone or its near the end of term and i am sad about people graduating/ things changing	4	2	0	1	1	0	0	0	0	0	0	0	-77	-77	-77	-77	-77	-77	-77	3	2	3	5	4	4	4	4	1	5	14	12	19	15	4	4.5	6	4	3.5
27	2	UK	UK	3	2	Classical, pop, indie, latino	cello	3	6	After breaking up with my boyfriend When I have felt homesick	4	3	1	0	1	0	1	0	1	1	0	0	3	5	5	6	5	7	7	3	4	5	6	7	3	3	3	5	5	22	24	22	12	6	7	4	6	5.5
23	2	UK	UK	4	1	Folk, Folk-rock, Indie, Swing-Jazz	Piano	2	3	- getting over a breakup	3	2	0	0	1	0	0	0	1	0	0	0	-77	-77	-77	-77	-77	-77	-77	2	3	4	5	5	4	4	4	3	7	20	22	25	10	4	6.5	2.5	4.5	4
46	2	UK	UK	4	2	Independent Rock, Euphoric dance	-99	1	1	I don't	1	4	0	1	0	0	1	0	1	0	0	0	-77	-77	-77	-77	-77	-77	-77	4	6	6	7	6	3	2	4	3	6	13	25	25	1	6.5	6.5	7	6	5
31	2	Germany	Germany	4	2	Singer-songwriter	-99	5	7	When I'm in love and miss the person because we can't be together or I don't hear from them. When I'm generally in a melancholy state or stressed out.	6	4	1	1	1	0	1	0	1	0	0	0	5	6	6	6	3	7	7	3	5	5	6	6	4	4	4	6	2	21	14	18	13	2.5	5	3.5	3.5	4.5
26	1	Germany	US	2	1	Blues, Bluegrass, Country, Jazz, Cajun, Funk	Banjo	2	4	When feeling nostalgic	5	6	0	1	1	0	1	0	1	0	0	0	-77	-77	-77	-77	-77	-77	-77	7	7	7	6	6	2	2	2	4	5	21	24	23	8	4.5	5.5	5.5	7	6.5
43	2	UK	India	4	1	-99	-99	6	6	when hurt, stressed or anxious too	5	3	0	1	1	0	1	0	1	0	0	0	-77	-77	-77	-77	-77	-77	-77	5	5	4	5	5	1	1	1	4	7	16	9	22	7	4.5	5.5	5.5	3.5	6
24	2	Germany	Germany	4	2	Rock music	-99	7	5	After having a discussion with friends, after breaking up with a boyfriend, losing a close friend or family member	5	3	0	0	1	0	1	0	0	0	0	0	-77	-77	-77	-77	-77	-77	-77	3	2	5	6	6	6	5	3	1	2	20	23	21	12	4.5	4	6	6	5.5
24	1	Germany	Germany	4	2	Electro	Clarinet	3	6	When I feel sad myself, when I want to remind myself of a past situation where I was neglected or sad	7	2	1	0	1	0	0	0	0	0	0	0	7	7	6	6	6	6	5	6	6	7	6	6	6	4	5	6	3	23	22	24	12	1.5	5	6.5	5.5	6
27	2	Germany	Germany	4	1	Rock, Indie, Alternative	Piano	6	5	when alone to feel less alone	7	5	1	1	1	0	1	0	1	1	0	0	5	7	6	6	6	6	6	6	7	7	6	6	5	5	3	6	3	18	13	21	18	3	3.5	5	2.5	6
25	2	UK	UK	4	2	Pop	-99	4	2	When looking to listen to relaxing/slow music. I.e. After a long/stressful day at work or just before bed I'd rather listen to slow music than fast. Thus my preference is base on speed rather than the emotion of the song.	3	4	0	1	1	0	1	0	0	0	0	0	-77	-77	-77	-77	-77	-77	-77	5	5	4	5	4	4	4	4	4	4	19	16	22	12	4.5	4	5	4	5
22	2	Netherlands	Netherlands	3	1	rock, punk, singer-songwriter, pop	played violin and keyboard in the past (during a period of +/- 5 years)	3	3	feeling abononed by other people (although this does not happen very often)	2	2	0	1	0	0	1	0	0	1	0	0	-77	-77	-77	-77	-77	-77	-77	5	5	6	5	5	4	3	4	5	6	24	14	17	16	2.5	4	5.5	3	3.5
26	2	Australia	Germany	4	2	Rock	-99	4	3	-99	2	5	0	1	1	0	1	0	0	1	0	0	-77	-77	-77	-77	-77	-77	-77	6	6	6	6	5	2	2	5	2	5	13	20	15	8	4.5	7	4.5	7	6.5
27	1	Germany	Germany	3	1	Indie, Postpunk, Folk, Art Rock, Chamber Pop, Electro Clash, Electro Punk, DnB	guitar	4	4	End of a relationship, end of a good experience, lonely weekends at home being ill, thinking of past events or of beloved people that have passed away	5	4	0	1	1	0	1	0	1	1	0	0	-77	-77	-77	-77	-77	-77	-77	7	7	6	6	7	6	6	5	3	5	19	19	21	20	5	3.5	5	3.5	4
24	2	UK	UK	4	3	-99	Piano (not playing at the moment)	1	1	I do not seek out sad music.	1	1	1	0	0	0	0	0	0	0	0	0	5	6	6	6	4	1	1	1	1	1	1	1	1	1	1	1	1	19	15	20	17	3.5	3.5	2.5	2.5	4.5
26	2	Belgium	Serbia	4	2	rock/pop	-99	5	5	-99	4	5	0	1	1	0	0	0	0	0	0	0	-77	-77	-77	-77	-77	-77	-77	5	6	7	7	7	7	7	7	7	7	21	21	24	13	2.5	6	5.5	4	4.5
28	1	Netherlands	Romania	4	2	pop; soul; blues; dance; house	-99	5	6	-99	7	3	0	0	1	0	1	0	0	1	0	0	-77	-77	-77	-77	-77	-77	-77	5	4	4	2	4	4	5	4	1	1	14	8	11	7	2.5	3.5	4	4.5	4
25	2	Germany	Germany	3	2	rock	piano	2	6	a friend died	2	5	0	1	1	0	1	0	0	0	0	0	-77	-77	-77	-77	-77	-77	-77	2	3	4	5	2	4	4	4	1	1	23	13	15	11	6	4	7	7	4.5
29	2	Germany	Canada	4	1	indie - whatever it is that that is and a bunch of everything else.	Piano	3	7	During a break up, or during winter.	5	3	1	1	1	0	0	0	1	1	0	0	5	7	6	7	5	5	7	5	5	4	5	4	5	5	5	4	4	15	19	20	10	7	4.5	4.5	3.5	6.5
28	1	Denmark	Denmark	2	1	Classical music, world musics	Piano	5	4	When I want to relax and calm down. When I'm in search of an aesthetic and touching experience.	6	5	0	0	1	0	1	0	1	0	0	0	-77	-77	-77	-77	-77	-77	-77	6	7	4	6	4	2	1	3	5	6	16	17	22	15	4	2.5	6	3	7
61	2	US	US	4	1	Alternative (Phil Glass, John Cage) Illeann Pipes, clasical, classic rock, blues	-99	4	6	grieving over death of loved one, lost opportunities, hopelessness regarding future, seasonal sadness	4	3	1	1	1	0	0	0	0	0	0	0	6	7	6	6	5	5	5	4	4	3	3	2	5	5	3	4	4	15	13	19	7	3.5	3.5	3.5	3.5	6.5
28	1	Denmark	Denmark	2	1	Classical	Piano	3	2	-99	2	3	0	1	1	0	0	0	1	1	0	0	-77	-77	-77	-77	-77	-77	-77	2	4	4	5	5	4	5	4	4	5	20	22	22	20	4.5	4	4.5	2.5	6
25	2	Italy	Iran	4	2	Persian traditional, Jazz, Pop	-99	5	4	When I feel dramatic about a situation and need some empathy	6	3	0	1	0	0	1	0	1	0	0	0	-77	-77	-77	-77	-77	-77	-77	3	4	5	3	5	6	3	6	4	5	16	17	18	7	1	5.5	6.5	6.5	6.5
25	2	Germany	Germany	3	2	Rock/Pop/Metal/Classics	Violine	5	7	- Weltschmerz/ sadness of life - treasuring lost love ;) / thinking about the past and occ. the future - relaxing - depressing moments	6	5	1	1	1	0	1	0	0	1	0	0	5	6	6	6	6	6	6	3	4	6	6	3	1	1	1	7	7	25	21	24	13	2	5	4.5	4.5	5
27	2	Germany	Germany	4	1	rap , hip hop, rnb, minimal, classic	-99	5	4	Lovesadness	3	4	0	1	1	0	1	1	1	1	0	0	-77	-77	-77	-77	-77	-77	-77	6	6	6	6	7	5	5	5	1	1	14	16	25	18	3.5	4.5	4.5	2.5	6
28	1	Denmark	Denmark	3	1	Rock, Metal, Indie Rock, Country, Jazz, Pop Rock, Blues	Guitar	5	3	When i'm feeling lonely	6	6	0	0	1	0	1	0	0	1	0	0	-77	-77	-77	-77	-77	-77	-77	3	6	7	7	7	7	5	4	6	7	17	25	18	9	6.5	6	4.5	7	7
28	1	Denmark	Denmark	3	2	Progressive metal, classic rock/heavy metal, electronica, romantic era composers	drums	4	3	When my mother died -- used I won't back down Tom Petty cover by Johnny Cash sas a theme of transition.	2	4	1	1	1	0	1	0	1	1	0	1	5	6	3	3	5	5	6	5	5	3	5	3	4	4	4	1	4	10	20	16	6	5	6.5	5	7	6.5
30	2	US	Greece	4	1	Folk, jazz, rock, alternative, classical, world music	-99	4	5	When I want to be relaxed, when I think of ways to deal with certain situations I play sad music.	6	3	0	1	1	0	1	0	0	0	0	0	-77	-77	-77	-77	-77	-77	-77	2	4	3	2	6	4	4	4	2	3	17	15	21	12	6.5	5	5	3.5	7
25	2	Belgium	Greece	4	1	anything that sounds good to me	voice	4	5	thinking about the past (love, friendship)	5	4	0	1	1	0	1	0	0	1	0	0	-77	-77	-77	-77	-77	-77	-77	3	5	4	5	4	4	4	5	2	2	13	17	20	11	3	5	6	3	5
24	2	Germany	Germany	2	2	soul, pop, jazz, classic	voice, piano	5	5	Wenn ich alleine zu Hause bin und in einer bestimmten Stimmung bin, meistens bin ich nicht besonders traurig, aber in solchen Momenten habe ich Lust ein bisschen melancholisch zu sein. Traurige Musik wärmt mich mehr als fröhliche. Man kann dann bestimm	7	6	0	1	1	0	1	0	0	0	0	0	-77	-77	-77	-77	-77	-77	-77	5	7	5	5	5	1	1	1	5	2	18	19	23	14	6.5	6.5	6.5	5	5.5
32	1	Germany	Germany	2	1	Blues, Hip-Hop, Pop, Trip-hop, Rock, Motown...	Voice/Guitar	3	3	If you count melancholy Jazz and Blues as sad music, I simply like to put it on to kick back and relax.	4	3	0	1	1	0	1	0	1	1	0	0	-77	-77	-77	-77	-77	-77	-77	6	7	6	5	6	7	7	7	6	4	26	17	17	14	4.5	3.5	4.5	4.5	5
25	2	UK	Greece	4	1	Rock, Jazz, classical	Piano	4	7	Feeling lonely or homesick, missing someone or something from the past, bad weather	7	4	0	1	1	0	1	0	1	1	0	0	-77	-77	-77	-77	-77	-77	-77	5	7	5	6	5	2	2	2	5	5	24	20	26	14	4.5	5	6	2	4.5
25	1	Germany	Germany	2	1	Psychedelic, Psytrance, Classic, Good Music ;)	Guitar, Piano, Voice, Bass	5	6	When I feel lonely. When somethings goes wrong and a depression is coming. When I'm lovesick. When the night is too dark and I wait for the morning.	6	5	1	1	1	0	1	0	0	0	0	0	2	6	6	4	3	4	3	7	7	4	5	2	4	4	4	6	4	11	17	11	6	1.5	5	3.5	5.5	7
30	2	Greece	Greece	4	2	radio	-99	2	2	Almost never	3	1	0	0	1	0	0	0	1	0	0	0	-77	-77	-77	-77	-77	-77	-77	6	6	4	5	5	4	4	5	3	3	15	5	24	9	5	4	5.5	2.5	5
24	1	UK	UK	2	1	Jazz, metal, fusion, rock	Guitar	4	6	When I miss my friends and family in another country, or the country itself	4	6	0	1	1	0	1	0	1	1	0	0	-77	-77	-77	-77	-77	-77	-77	7	6	5	5	7	6	6	6	7	3	25	27	18	2	6.5	4.5	4	7	6.5
25	2	Denmark	US	2	1	Classical, jazz, folk, rock	voice	2	6	If I have been immensely stressed and have use for a catharsis, then I will listen to more calming or nostalgic music on a free day.	4	4	0	0	1	0	1	0	0	0	0	0	-77	-77	-77	-77	-77	-77	-77	6	6	6	7	4	7	7	7	3	5	23	20	24	6	5.5	6	4	2	7
24	2	UK	UK	4	1	indie, motown, rock, blues, pop	-99	2	2	after a break up	3	3	1	1	1	0	0	0	0	0	0	0	4	6	6	5	7	5	6	5	5	5	4	5	4	4	4	5	5	22	18	27	18	1.5	5	3	1.5	3.5
23	2	Austria	Austria	3	1	Rock, Alternative Rock	Piano	4	7	thinking about sad situations, breakups, feeling lonely, etc.	6	2	0	0	1	0	0	0	0	0	0	0	-77	-77	-77	-77	-77	-77	-77	6	7	4	6	6	4	4	4	7	2	20	13	25	15	6	7	5.5	5.5	3
28	2	Germany	Russia	4	2	psychedelic rock, folk, world music, ambient, oriental	-99	4	6	sadness melancholy self pity long period without physical activity	6	5	0	0	1	0	1	0	1	0	0	0	-77	-77	-77	-77	-77	-77	-77	7	6	5	3	2	4	6	6	4	1	20	22	18	11	5	4.5	5.5	5.5	6.5
23	2	Netherlands	Germany	4	1	Rock, Alternative, Black Metal, Psychedelic Doom Rock	-99	4	7	Loss of a beloved one, arguments with people, distress through work	7	6	0	1	1	0	1	0	1	1	0	0	-77	-77	-77	-77	-77	-77	-77	5	7	3	7	7	6	4	4	4	5	19	23	20	9	4.5	5	5.5	3.5	6
27	1	UK	UK	1	1	Rock, Indie, Pop, Punk, Heavy Rock, R&B	Drums	5	7	when I want to be inspired	5	4	1	1	1	1	0	1	0	1	1	0	6	7	7	7	7	7	7	6	7	7	6	2	3	7	7	7	7	19	26	21	21	5.5	4.5	3	1.5	6.5
27	2	Belgium	Germany	3	1	electronic, singer-songwriter, classical	piano	3	7	when being lovesick and need comfort	6	2	1	1	1	0	0	0	1	0	0	0	6	6	5	6	5	7	7	6	7	5	6	6	3	6	5	7	5	10	18	21	20	3.5	4.5	6.5	5.5	6.5
22	2	Austria	Austria	2	1	Klassik	Cello	5	7	Feeling lonely, having stress	7	4	1	1	0	1	0	0	0	0	0	0	7	6	6	1	3	7	7	1	1	6	5	7	7	7	1	1	4	12	16	25	14	3	5	6	1	7
24	2	Germany	Germany	3	1	classical, acoustic, pop, hiphop	guitar	5	7	When being in a melancholic mood	6	5	1	1	1	0	1	0	1	1	0	0	5	6	5	7	6	6	7	4	7	7	7	7	6	6	4	2	2	15	19	18	12	6	6.5	6	3.5	6
26	2	Switzerland	Italy	1	2	Baroque	Recorder	4	5	Probably when something sad had just happened. Also because the harmonies of sad music are much more intense and go direct to your belly.	6	3	1	0	1	0	1	0	0	1	0	0	2	5	5	6	5	1	5	2	3	3	3	6	6	7	7	6	6	18	15	19	13	4	4	4.5	1.5	6
30	1	US	US	3	1	rock/jazz/funk/hip-hop	Bass Guitar	4	5	what others might deem sad , i think of as deep . Pyramid Song by Radiohead is a good example. I listen to it to evoke a sense of awe, which in my mind necessitates a bittersweet nature; not entirely happy nor sad, but all-encompassing.	4	4	1	1	1	0	0	0	1	1	0	0	6	6	5	4	5	6	6	5	6	6	6	6	6	6	5	6	6	24	24	23	8	4	6	4.5	5.5	5
56	1	US	US	2	1	Rock, Blues, Reggie	Guitar	3	2	When the song is very high quality or I just happen to like it.	2	5	0	0	1	0	0	0	0	0	0	0	-77	-77	-77	-77	-77	-77	-77	2	7	5	7	7	4	5	4	6	6	23	16	21	14	2	6	6.5	5	3.5
56	2	Ireland	Ireland	3	1	opera, classical, film	Piano	5	6	When alone. When i want to be moved by music. When I want to calm down and feel centred.	5	6	1	1	1	0	1	0	1	1	0	0	5	5	6	7	7	4	7	7	7	7	7	7	7	7	7	7	7	20	12	25	14	7	6	6	5	7
21	2	US	US	4	2	Rock, Techno, House, Pop	-99	2	3	When I want to focus on homework.	2	5	1	1	1	0	0	0	1	1	0	0	3	7	2	5	2	2	5	2	4	5	5	5	2	2	2	2	2	20	19	18	9	1.5	5.5	5.5	6	5
24	2	US	Germany	4	2	electro, pop, indie pop, hip hop	-99	3	7	thinking about the past mind wandering	2	4	0	1	1	0	1	0	1	1	0	0	-77	-77	-77	-77	-77	-77	-77	6	6	6	4	4	5	5	5	5	5	21	13	24	17	6	4	5.5	5.5	4
27	1	Canada	US and Canada	2	1	pre-dancehall Jamaican, americana, electronic and Balkan/North-African folk	Mandolin	5	5	Thinking about the past and feeling melancholic, ruminating or simply woolgathering. Regardless, when I'm alone and absorbed in thought and seeking a meditative, mindful state.	6	4	0	1	1	0	1	0	0	0	0	0	-77	-77	-77	-77	-77	-77	-77	7	3	6	6	4	5	4	4	3	2	14	21	14	6	2.5	4.5	6	6	6
29	1	Greece	Greece	4	1	Jazz, Rock, Progressive, Trance	Bass	5	5	to Calm Down to Rest at the end of each day.	3	5	0	1	1	0	1	1	0	1	0	0	-77	-77	-77	-77	-77	-77	-77	5	6	6	6	6	6	6	5	2	4	20	18	17	14	2	5	5	5.5	4
21	2	UK	UK	3	1	Rock, Punk, Indie, Alternative, Hip Hop	Guitar	5	7	When I was going through a tough time in my life when I felt lonely and unwanted I would listen to sad music as I felt that it connected with my current emotions.	6	3	1	0	1	0	1	0	0	1	0	0	6	7	7	5	6	7	7	3	3	6	7	7	6	7	6	7	6	16	19	25	12	3.5	7	6	4	6
30	2	Greece	Greece	4	1	pop,orchestral,poprock,minimal,britpop	voice	3	6	bad mood, tired, before bed,in the car, when reading	4	3	0	0	1	0	1	0	1	0	0	0	-77	-77	-77	-77	-77	-77	-77	5	5	5	5	4	4	4	4	7	7	26	18	26	21	3	7	3	3.5	5.5
23	2	Germany	Germany	3	2	Pop/rock, radio, classical, alternative	transverse flute	2	7	When I need to clam down, when I feel sad/ lonely/ frustrated...	5	2	1	1	1	0	1	0	0	0	0	0	2	4	2	7	6	7	7	5	6	7	4	3	4	3	3	2	2	24	17	17	14	7	5	6.5	6	5
29	1	Germany	Greece	1	2	Classical, Jazz, Pop, Rock	Viola	1	1	I never seek out for sad music.	2	2	0	1	1	0	1	0	1	0	0	0	-77	-77	-77	-77	-77	-77	-77	1	1	2	2	2	2	1	2	1	6	12	25	14	0	5.5	3.5	6.5	6.5	7
26	2	Germany	Germany	4	1	classic, electronic, indie	piano	4	7	feeling lonely, heart broken	7	4	1	0	1	0	1	0	0	1	0	0	6	7	5	4	5	4	5	4	4	4	5	3	3	3	3	5	4	18	18	22	9	6	5	5.5	5	6
31	2	France	Greece	4	1	Rock, classical, baroque, jazz, alternative rock, punk rock, gypsy punk,blues	piano	6	7	Whenever I feel melancholic, lonely and/or thinking about past painful experiences.	7	4	0	0	1	0	1	0	1	1	0	0	-77	-77	-77	-77	-77	-77	-77	6	7	6	7	7	7	7	7	7	7	23	21	28	14	5	6.5	4.5	2.5	6
24	2	Netherlands	Germany	4	2	EBM, Industrial, Metal	-99	3	5	Feelings of hopelessness, frustration, seeking balans for euphoria	4	3	0	1	1	0	1	0	0	1	0	0	-77	-77	-77	-77	-77	-77	-77	5	6	6	6	6	6	6	4	4	5	20	16	18	12	6	4	6	4	5
24	2	Germany	Germany	4	2	Pop	-99	4	5	when I feel lonely, sad music comfort me	5	5	0	0	1	0	1	0	0	0	0	0	-77	-77	-77	-77	-77	-77	-77	5	6	5	5	5	6	6	4	5	5	20	15	22	13	2.5	4.5	5.5	4.5	4
25	2	UK	UK (till age 12) & New Zealand (from age 12-22)	3	1	Classical	Voice or flute	3	3	Sometimes if I'm relaxing at the end of the day	2	4	0	0	1	0	0	0	0	0	0	0	-77	-77	-77	-77	-77	-77	-77	2	6	6	6	6	6	4	4	5	5	27	18	23	10	2.5	4.5	5.5	2.5	5
25	1	Germany	Germany	3	1	Rock, Folk, Classical	bass guitar	4	5	relaxation, calming down, concentrating, during work	4	5	0	0	1	0	1	0	1	1	0	0	-77	-77	-77	-77	-77	-77	-77	6	6	5	4	5	2	2	2	2	3	22	20	21	21	1	4.5	5	3.5	5.5
28	1	Canada	Canada	3	1	Rock/pop	Drums and percussion	2	4	-99	2	2	0	1	1	0	1	0	0	0	0	0	-77	-77	-77	-77	-77	-77	-77	4	5	6	5	4	5	2	2	5	4	15	24	18	5	4.5	4	5.5	6.5	4.5
29	2	Greece	Greece	1	1	Classical	voice	7	6	Social disapointment, carier disapointment, melancholy	4	4	0	1	1	0	1	0	1	0	0	0	-77	-77	-77	-77	-77	-77	-77	3	4	3	7	5	7	7	7	7	7	21	15	27	21	6.5	4	5.5	2	7
34	2	South Africa	Germany	3	1	Word Music (especially Brazilian, Latin and African), Classcial Music	piano	3	4	-99	3	3	0	1	1	0	1	0	1	0	0	0	-77	-77	-77	-77	-77	-77	-77	6	6	6	6	6	4	4	4	4	5	17	21	25	12	3.5	6.5	7	7	7
27	2	Mexico	Mexico	4	1	Rock, pop	-99	3	6	When I feel confused. When I feel about to cry.	6	4	1	0	1	0	1	0	1	1	0	0	5	7	7	7	6	7	6	5	7	4	3	3	5	7	5	3	3	23	15	24	21	4.5	3	4.5	1.5	5.5
26	1	UK	Greece	4	1	Alternative/Indie	Voice	4	5	After work	5	3	0	0	1	0	1	0	0	0	0	0	-77	-77	-77	-77	-77	-77	-77	6	6	5	3	3	2	2	5	2	2	7	13	16	9	3	5.5	4.5	6	6
32	1	Bulgaria	Bulgaria	4	2	Rock, Pop	A little bit on guitar	3	4	A Loss, Loneliness	3	2	1	1	1	0	0	0	0	0	0	0	6	7	5	4	4	3	5	5	4	4	4	5	4	4	4	4	4	12	18	26	11	6.5	6	6.5	6	6.5
29	2	Greece	Greece	4	1	rock, rembetiko, funky	-99	4	7	exams period, living away from my family, friends..	5	4	0	1	1	0	1	0	0	1	0	0	-77	-77	-77	-77	-77	-77	-77	6	6	6	5	5	6	6	5	4	3	12	15	11	13	4.5	4	4	3.5	4.5
29	2	Finland	Italy	4	1	Post-rock, indie, folk, etno	voice	4	5	If I want to be in togh with my inner me	5	3	0	0	1	0	1	0	1	1	0	0	-77	-77	-77	-77	-77	-77	-77	4	7	4	6	4	4	4	4	4	4	23	24	27	20	5.5	6.5	5.5	3	6
36	1	Greece	Greece	2	1	Classical,Rock Music	Piano	6	5	-99	6	6	1	1	1	0	1	0	0	1	0	0	6	4	6	6	3	1	1	3	5	5	6	5	5	6	6	7	7	17	19	23	9	1.5	5	3.5	3	5.5
26	2	UK	Greece	3	1	Trip hop, hip hop, electronica	piano	3	4	When the weather is gloomy, feeling lonely	4	4	0	0	1	0	0	0	1	1	0	0	-77	-77	-77	-77	-77	-77	-77	5	5	5	5	5	5	5	5	6	5	16	23	20	11	4	6	5	4.5	5.5
25	2	Greece	Greece	1	1	rock, jazz	flute	6	7	depression, break up	6	2	0	1	1	0	1	0	0	0	0	0	-77	-77	-77	-77	-77	-77	-77	4	5	5	5	7	7	7	6	5	6	9	22	26	10	6.5	4.5	5	4.5	6.5
25	2	Germany	Greece	4	2	everything	-99	5	5	-99	5	5	0	1	1	0	0	0	0	1	0	0	-77	-77	-77	-77	-77	-77	-77	2	5	6	6	6	3	2	2	5	5	12	18	20	13	4	5.5	6.5	6	6
26	2	Germany	Germany	3	1	Alternative, Classic, Singer/Songwriter	Voice	4	7	When I'm thoughtful, but generally in a positive mood - like being alone at home, not feeling alone, but thoughtful.	1	4	0	0	1	0	1	0	0	0	0	0	-77	-77	-77	-77	-77	-77	-77	3	5	5	4	2	4	4	4	1	5	21	21	21	7	4.5	6.5	3.5	6	6
35	2	Germany	Iran	3	2	Iranian folk music	piano and recorder	4	3	I often listen to pieces which others find them sad music. Although I do not think of them as real sad music. So I could say that 50% of the time I am listening to sad music. here is also a link to what I often listen and others recognize it as sad music	7	4	0	0	0	0	1	0	0	0	0	0	-77	-77	-77	-77	-77	-77	-77	4	4	3	6	4	5	5	5	6	7	21	16	23	17	3.5	6	6.5	2.5	4.5
28	1	UK	UK	4	1	rock n roll	-99	5	5	thinking about dad thinking about being hurt emotionally	3	3	1	0	1	1	0	0	0	0	0	0	4	5	6	4	7	7	4	7	6	4	7	5	4	4	4	6	3	14	20	22	6	5	4	5	4	4
29	2	Greece	Greece	1	1	classical, contemporary classical	piano	4	7	contemplating on general aspects of life/ reminiscing the past / wanting to relax /	5	6	0	1	1	0	1	0	1	1	0	0	-77	-77	-77	-77	-77	-77	-77	5	5	3	6	7	6	6	5	1	1	26	17	26	21	7	2.5	4.5	1	6
25	2	New Zealand	Germany	3	1	Alternative rock, independent, post rock	Voice	6	5	Evenings, feeling bitter sweet melancholic	6	5	0	1	1	0	0	0	0	1	0	0	-77	-77	-77	-77	-77	-77	-77	5	7	7	6	6	5	5	5	7	7	25	16	23	10	5.5	4.5	6	4.5	6.5
25	2	Netherlands	Czech Republic	1	1	classical, klezmer, folk, world music	oboe	3	6	feeling lonely, thinking of my home country, bad weather	5	3	0	0	1	0	0	0	1	0	0	0	-77	-77	-77	-77	-77	-77	-77	6	6	5	6	5	6	6	5	5	6	14	18	22	5	1.5	3.5	6.5	5	4
22	2	UK	UK	3	1	Folk, Country, Reggae, Acoustic	Voice	2	3	-99	2	5	0	0	0	1	1	0	0	1	0	0	-77	-77	-77	-77	-77	-77	-77	5	5	5	6	3	5	4	4	7	7	18	17	24	12	7	4	4.5	6.5	6.5
29	1	Germany	Germany	3	1	classics	cello	3	2	when i feel lonely and need to be understood	4	2	0	0	1	0	1	0	0	1	0	0	-77	-77	-77	-77	-77	-77	-77	6	5	5	5	4	5	6	4	6	3	16	17	17	12	3	3.5	5	5	4.5
28	1	Greece	Greece	1	1	Classical	Viola	4	7	-99	5	5	0	0	1	0	1	0	1	0	0	0	-77	-77	-77	-77	-77	-77	-77	2	4	1	2	4	6	6	6	1	1	18	24	21	13	2.5	5	5.5	7	5
25	2	Germany	Germany	3	2	Pop (Radio), R'n'B, Rap, House, Elektro, Singer/Songwriter, movie soundtracks	1. Piano, 2. Violin	5	5	while riding a train and looking out of the window and let thoughts come and go while walking the streets on a rainy day as background music for studying for exams etc	5	6	0	1	1	0	1	1	0	1	0	0	-77	-77	-77	-77	-77	-77	-77	6	6	6	6	6	6	6	5	7	6	21	13	25	17	5	4	4.5	2.5	4.5
30	2	Germany	Serbia	4	1	Rock and oriental music	-99	2	1	Normally I do not seek out sad music when I`m sad, because it would make me feel even worse. I can only bear listening to the sad music I love when I am in a good mood. When I am sad, I skip all the sad tracks on my mp3 player	2	6	1	0	1	0	0	0	0	0	0	0	6	7	7	7	4	5	7	1	1	2	5	6	4	6	4	3	6	16	21	26	14	5	5	4	6	5.5
22	2	Netherlands	Latvia	2	1	Classical (mostly post-1950), metal, progressive rock	violin	5	6	Getting my heart broken (of course); failing at something I thought was important to succeed in; having a contemplative mood.	5	3	1	1	1	0	0	1	0	0	0	0	5	7	6	5	3	7	6	5	7	2	7	6	6	4	3	3	3	19	23	22	9	6	3.5	4.5	5	7
25	1	Canada	Belgium	3	1	Metal, Psytrance, Folk, Rock, Hard Electronic Music	Guitar	4	3	Bad days for example, where I feel hopeless and as though I 'can't handle life', to match my inner world. At other times I seek this music to help me to release my pain	3	6	1	0	1	0	1	0	1	1	1	0	3	3	2	6	3	7	3	6	4	3	5	7	5	6	3	3	2	16	20	16	10	3.5	5.5	2.5	6.5	6
32	2	Czech Republic	Czech Republic	4	2	pop, rock	guitar	4	6	when I am depressed	5	3	1	1	1	0	0	0	0	0	0	0	5	5	7	4	6	7	6	5	4	5	5	6	5	5	5	3	5	24	21	19	18	2	6.5	6	4.5	2.5
25	1	Denmark	Denmark	3	1	Indie rock	Violin	2	2	Evenings when I'm alone in my apartment	5	2	0	1	1	0	1	0	0	1	0	0	-77	-77	-77	-77	-77	-77	-77	4	6	6	5	5	1	1	1	1	1	13	26	26	5	5.5	5	5.5	6.5	6
31	2	New Zealand	Singapore	4	1	Jazz, Bossa Nova, Indie Pop	Ukulele, Voice	5	6	Winter, gloomy days, Had a fight with someone, Read a piece of sad news from the internet	7	3	0	0	1	0	1	0	1	0	0	0	-77	-77	-77	-77	-77	-77	-77	3	4	7	7	7	6	6	6	4	7	24	23	27	12	7	7	5	5.5	6.5
26	2	Germany	Brazil	4	2	pop	-99	2	7	Some bad situation at work, fight with my boyfriend, when I am missing my family...	6	1	1	0	1	0	0	0	0	0	0	0	5	7	6	5	5	7	7	7	3	7	7	6	5	3	6	7	5	24	21	23	13	7	5	4.5	2	7
27	1	Germany	Germany	3	1	Rock, Metal, Alternative, Minimal, Electro	Guitar	5	4	going to sleep	4	5	0	0	0	0	1	0	0	0	0	0	-77	-77	-77	-77	-77	-77	-77	5	5	5	4	6	5	5	5	3	2	19	16	19	8	3	5.5	5.5	4.5	6.5
36	1	France	Ireland	4	1	indie folk blues	tin whistle	5	5	Home alone, a glass of red wine in hand thinking about what could / might've been... In general as a vehicule to take me to places I prevent myself from visiting in day-to-day life	3	6	1	1	1	0	1	0	1	0	0	0	3	5	4	3	5	6	5	5	6	5	5	5	6	6	6	7	7	17	16	17	8	6.5	4	5	5	6
33	2	Germany	Germany	4	2	Rock, Pop, Electronic, Beat	-99	2	2	Relaxing, being emotional, but not especially sad or lonely	1	4	1	1	1	0	1	0	1	0	0	0	5	6	4	7	1	1	6	4	6	6	6	6	6	4	3	4	4	19	18	23	15	6.5	6	4.5	4.5	5
25	1	Denmark	Denmark	4	2	Indie rock	-99	4	2	I normally prefer sad music becuase I think the lyrics are more interesting and the music is more intense. Hence when I am sad myself I don't actively seek sad music	1	6	0	0	0	0	1	0	0	1	0	0	-77	-77	-77	-77	-77	-77	-77	2	2	4	5	5	6	5	5	5	3	11	16	12	10	3.5	7	4.5	5	5
36	2	Czech republic	Greece	4	1	Classical music,Pop, Rock, RnB, Jazz	Piano	4	6	Bad day, bad at work,feeling unsecure about my future, feeling homesick	4	3	0	1	1	0	0	0	0	1	0	0	-77	-77	-77	-77	-77	-77	-77	5	5	5	6	5	6	6	6	6	6	23	12	24	9	6	4	6.5	3	6.5
27	2	Germany	Mexico	3	1	jazz (in the broadest sense), classical, electro	Cello, Piano	4	3	I think I am more interested in the melody/harmony of a piece, and sometimes it happens to be sad, but it is not the actual sadness that draws me to specific songs.	4	4	1	1	1	1	1	0	1	1	0	0	5	5	6	5	5	7	5	2	5	5	6	6	6	6	4	7	6	14	21	26	11	6	7	4.5	4	7
25	2	Germany	Germany	3	1	Electronic, Psytrance, Ambient	Voice	5	7	Personal problems e.g. relationship, failures, bad mood	6	3	1	0	1	0	0	0	0	0	0	0	7	7	6	6	6	7	6	2	3	5	5	6	6	6	5	6	7	14	17	26	21	2	4.5	5	2	6
24	2	Italy	Italy	3	1	Italian music	guitar	6	5	When I want to be alone	5	6	0	0	1	0	1	0	1	0	0	0	-77	-77	-77	-77	-77	-77	-77	4	3	3	6	5	4	4	4	7	7	22	19	17	9	3.5	4	2	4.5	6
28	2	Italy	Italy	4	1	rock, jazz, metal, rap	-99	3	5	when I think about memories (not necessarely sad ones) when when I'm in a sad mood it can help me ponder about myself and my feelings	5	4	0	1	1	0	1	0	0	1	0	0	-77	-77	-77	-77	-77	-77	-77	6	5	7	7	6	6	6	6	2	5	23	23	24	14	4	5	6	3.5	6.5
24	2	Germany	Germany	3	1	soundtracks, indie, pop	piano	6	1	1.) after a day of to much cognitive input (not because it makes me sad, just in order to relax!) 2.) on a journey (train) contemplating impressions and memories	3	6	0	1	1	0	1	0	1	1	0	0	-77	-77	-77	-77	-77	-77	-77	2	6	4	5	5	5	3	3	6	6	17	14	22	17	5.5	7	5.5	3.5	5.5
25	1	Italy	Italy	2	1	songwriters, electronic music, rock music, romantic music, others	piano	3	5	I listen to sad music when I'm feeling a lack or an absence of something	3	5	1	1	0	0	1	0	1	0	0	0	2	3	6	6	5	1	4	5	6	1	5	2	4	4	4	5	5	21	23	22	3	4.5	3	4.5	5.5	6.5
33	2	UK	UK/US	4	2	Pop	-99	3	6	when i have had a difficult day and am feeling sorry for myself	5	3	0	0	0	0	0	0	0	0	0	0	-77	-77	-77	-77	-77	-77	-77	4	4	4	6	6	3	3	2	7	7	17	20	23	11	5.5	5.5	4	3.5	6.5
25	2	US	US	3	1	Country, Pop, Folk	voice	6	4	Sad music sounds good	5	7	1	1	1	0	1	0	0	1	0	0	7	7	7	7	7	7	7	2	5	5	5	6	7	7	7	7	7	28	23	26	14	7	5.5	7	2	7
27	1	Norway	Norway	1	1	Classical, Contemporary Jazz, Indie Pop/Rock	Piano	3	6	When I want to come in contact with diffucult feelings and venting	5	5	1	1	1	0	1	0	0	1	0	0	5	7	5	6	4	7	7	5	6	6	6	7	6	5	5	4	3	13	13	18	7	7	3	6	6	7
39	2	UK	Singapore	3	1	Classical, rock, soundtracks, musicals	Piano	5	2	As emotional preparation to be sad for acting scenes. Feeling lonely or abandoned. Feeling edgy and out of sorts.	4	5	0	0	1	0	1	0	1	0	0	0	-77	-77	-77	-77	-77	-77	-77	6	7	4	5	7	5	5	4	4	6	22	21	23	15	3	6.5	6.5	4	6.5
30	1	Germany	Greece	1	1	Jazz	guitar	4	1	There is no specific reason, I put sad music in the same basket with happy, it's the same for me	1	6	0	0	1	0	0	1	1	1	0	0	-77	-77	-77	-77	-77	-77	-77	1	1	6	4	4	7	7	6	1	1	19	24	25	15	3	3.5	6	4	6
43	1	Germany	Germany	4	1	depressive black metal, doom, hardcore techno	i am djing	6	4	i am a depressive and melancholic person all my life so i seek reflection through sad music since mid 80s	7	5	1	1	1	0	1	0	1	1	1	0	5	5	6	7	6	6	7	6	6	6	6	6	6	6	4	5	6	18	19	20	14	5.5	4.5	3.5	3	6.5
23	2	Germany	Germany	4	1	Rock, Pop, Indie, Folk, Soul, Jazz, Blues, Classical Music	Accordion	3	6	after a fight with a friend oder failure at work	7	3	0	0	1	0	0	0	0	1	0	0	-77	-77	-77	-77	-77	-77	-77	2	5	5	4	6	4	5	4	3	4	14	18	18	13	3.5	4.5	6	4	5.5
26	2	Germany	Germany	3	1	classic, Rock, Pop/Musical	flute	5	4	alone at home, especially in winter, but also in the opera house	5	4	0	1	1	0	1	0	0	1	0	0	-77	-77	-77	-77	-77	-77	-77	5	5	4	5	6	3	5	6	6	5	19	21	20	14	2	3.5	5	2.5	4.5
33	1	Germany	Netherlands	4	1	sixties rock, psychedelic rock, electronic, techno, trip hop, chillout	voice	5	5	feeling melancholic, depressed or angry	7	5	1	0	1	0	1	0	1	1	0	0	4	6	5	4	7	4	5	5	4	5	6	5	6	7	6	7	4	20	9	12	8	3.5	5	4	4.5	5.5
22	2	Germany	Romania	4	2	Arabic, Soft Rock, Classical	-99	2	6	Mostly whenever experience in the day-to-day life a dissapointment.	3	1	1	0	0	0	0	0	0	0	0	0	6	6	4	4	6	7	6	4	4	2	4	2	1	1	1	1	2	17	21	22	10	5	4.5	7	5.5	6.5
40	2	Germany	Germany	4	1	Pop Music, Rock Music, Independent Music	-99	4	7	When I am sad, lovesick for example.	7	2	1	1	1	0	0	0	0	0	0	0	2	2	1	1	4	2	3	2	5	2	3	1	4	4	4	2	2	21	25	19	15	1	5.5	6	6.5	6
23	2	Germany	Germany	4	1	folk, punk, pop-rock, 80s	-99	4	7	-99	6	3	1	0	1	0	1	0	0	1	0	0	5	6	6	7	5	7	5	5	6	6	2	7	4	4	4	3	1	25	25	24	10	4	4	5	2	6
24	1	UK	US	4	1	Experimental Folk, Indie Rock, Hip-Hop/Rap	-99	4	6	Primarly whilst feeling low energy. I like something to complement my mood.	5	4	0	1	1	0	1	0	0	1	0	0	-77	-77	-77	-77	-77	-77	-77	6	6	6	6	6	6	7	5	2	2	20	14	15	10	4	5.5	5.5	5	4.5
56	2	Germany	Germany	4	1	Pop, Rock, Classics	Voice, flute	2	2	Feeling of sadness	2	3	0	1	1	0	1	0	0	1	0	0	-77	-77	-77	-77	-77	-77	-77	7	6	7	5	7	7	7	7	5	4	17	24	23	16	3	6.5	3.5	7	6.5
30	1	Spain	Colombia	4	1	Rock, reaggae, ska, folk	-99	4	6	I listen to sad music when Im not actually sad, so I can enjoy it more. I don't like to be sad.	2	5	0	1	1	0	1	0	1	0	0	0	-77	-77	-77	-77	-77	-77	-77	4	3	6	6	5	7	7	7	6	4	19	20	18	19	4	4.5	2.5	6	6.5
25	2	Italy	Italy	4	1	Jazz music, indie rock, chill wave	-99	4	5	Looking at old photographs	4	5	0	0	1	0	0	0	0	0	0	0	-77	-77	-77	-77	-77	-77	-77	3	7	6	6	6	4	6	4	7	6	15	16	18	9	4.5	4	1	7	7
28	2	Italy	Italy	3	1	pop-rock	-99	4	5	when I don't get what I want	5	3	0	1	1	0	1	0	1	0	0	0	-77	-77	-77	-77	-77	-77	-77	6	3	5	5	5	5	5	5	5	5	19	14	18	18	4.5	5	4.5	3.5	5
29	2	Germany	Germany	4	1	downbeat, jazz, classical, indie	-99	5	5	what is sad music? when i'm alone (not immediately lonely). when something intensive and bad happened to me or others (like also sad news in the newspaper etc.) when i feel like... hard to put in words.	5	4	0	1	1	0	1	0	1	1	0	0	-77	-77	-77	-77	-77	-77	-77	4	5	2	5	5	4	4	4	2	3	15	19	22	11	3.5	4.5	3.5	4.5	5
31	2	Greece	Greece	4	1	Alternative	Drums	4	7	Loneliness When evertday routine and busy s hedule make me forget who i am When i see that people around me are completely different from me	6	3	1	1	1	0	1	0	1	1	0	0	5	6	3	5	5	7	6	3	5	4	7	7	6	6	6	7	5	21	17	22	12	4.5	6	6	6	7
27	1	Sweden	Palestine	4	2	Pop, reggae, middle eastern	Tabla	2	3	Remembering sad and miserable life when I was child, because of political and social situation in my country.	2	1	1	0	1	0	0	0	1	0	0	0	5	6	5	5	5	7	5	5	4	5	6	5	3	3	6	6	3	17	17	18	13	4.5	4	4.5	4	6.5
33	2	UK	Italy	4	1	Rock, Grunge, Electronic, Italian songwriters,	guitar	4	5	1) When I think about sad situations which I've been through. 2) When I want to relax and dream.	4	4	1	1	1	0	1	0	1	1	0	0	7	7	5	5	2	3	7	4	5	5	2	5	6	6	6	1	5	18	17	21	15	4	6.5	7	6.5	5
31	2	Germany	Germany	4	1	classical, experimental pop, jazz	-99	3	6	If i feel specifically sad or if i feel that theres sth dark growing inside of me	6	2	1	0	0	0	1	0	1	0	0	0	3	5	6	4	2	6	6	2	5	1	7	7	1	1	1	2	1	6	13	15	8	5.5	5	6	7	6.5
27	2	Germany	Germany	2	1	classical music (especially baroque)	voice	5	2	often in the evening, sitting in the kitchen or driving alone in car.	4	5	0	0	0	0	0	0	0	0	0	0	-77	-77	-77	-77	-77	-77	-77	5	6	6	2	2	3	6	4	2	2	27	22	22	20	6	4	6.5	3	4.5
27	2	Greece	Greece	1	1	Classical music	Piano, voice	2	7	Anxiety	4	2	0	0	0	0	1	0	1	1	0	0	-77	-77	-77	-77	-77	-77	-77	5	7	7	6	7	6	5	6	2	2	24	17	22	17	5.5	5	4.5	3.5	7
30	1	Czech republic	Greece	4	2	Rock	-99	2	4	When the song is great, regardless of whether i am sad or not	4	7	0	0	1	1	0	0	0	0	0	0	-77	-77	-77	-77	-77	-77	-77	2	5	1	2	4	6	6	6	6	2	10	19	21	14	4	4.5	6.5	4.5	6
28	1	Canada	Canada	3	1	Indie Rock, Electronica, Metal, Folk	Bass Guitar	5	3	Almost all the time. I don't necessarily seek it out only when I'm happy or only when I'm sad, but I do find that most of the music I listen to has a sadness or anger to it, regardless of my current mood. If I am happy it does not make me more sad	6	6	0	0	1	0	1	0	0	1	0	0	-77	-77	-77	-77	-77	-77	-77	5	7	4	5	4	3	3	3	1	7	9	26	22	5	6.5	4	6	7	6
26	2	Czech republic	Greece	3	1	rock	voice	4	6	thinking about life choices/past, to create a more romantic/intimate atmosphere or a calm atmosphere while i read or surf the web	5	3	1	1	1	0	1	0	1	1	0	0	5	6	7	7	6	7	6	7	7	7	7	7	7	7	7	6	6	24	22	26	15	4	5	5	3.5	5
25	2	UK	Turkey/Holland	3	1	Rock/Stoner Rock, Metal, African Music, Industrial/electronic music, dubstep,etc	I used to play the piano and sing.	3	5	memories/thinking about the past or even though it's a sad song I may just think it's beautiful so I listen to it.	5	4	1	1	1	0	0	0	0	1	0	0	6	7	6	6	6	5	5	6	5	6	6	6	5	6	5	7	6	16	14	21	10	3.5	4.5	5.5	3	7
28	2	Germany	Germany	4	2	alternative, pop	-99	3	6	when I want to remember a situation related to this song; when I feel melancholic and I am enjoying it; when I am tired or want to get tired/comfy	5	5	0	1	1	0	1	0	1	0	0	0	-77	-77	-77	-77	-77	-77	-77	5	3	6	5	2	2	4	1	5	2	15	14	19	18	3.5	4.5	6	4	6
28	1	Colombia	Colombia	3	1	Electronic, Hip-Hop, Rock & Roll	Ukulele	2	7	Remembering failures, especially romantic failure	1	4	1	0	1	0	0	0	0	1	0	0	2	7	3	1	5	6	7	1	5	4	5	4	7	5	6	4	7	18	17	23	7	2.5	4.5	7	5	7
34	2	Ireland	Ireland	3	1	Dance, Indie, Bluegrass, Old Time, Irish Traditional, Classical	Uilleann Pipes, Whistle (Haven't played in years)	1	2	To Relax. Or if I have a headache etc… or most often if I need to work and block out noises around me...Rarely seek it out conciously but if I'm playing music it's usually sad and slow.	1	5	0	1	1	0	1	0	1	0	0	0	-77	-77	-77	-77	-77	-77	-77	4	7	7	7	7	5	5	6	4	5	23	20	20	9	3	5	2.5	5.5	6.5
23	1	Germany	Germany	3	1	grunge, alternative, indie, minimal, postrock	Guitar	3	5	feeling lonley, after fights with loved ones etc	5	3	1	1	1	0	1	0	0	1	0	0	3	5	6	5	5	6	7	5	6	6	7	4	4	4	4	4	5	11	19	17	11	3.5	4	3.5	4	6
23	2	US	US	2	1	Pop	Flute	7	7	-99	6	3	1	0	0	0	1	0	0	0	0	0	6	7	6	6	5	5	6	6	6	6	6	6	6	6	6	6	6	18	21	24	15	4	5.5	6.5	5	6
55	2	Germany	Germany	3	1	Pop	Flöte	6	5	Zur Entspannung, zu Feiertagen, wenn ich traurig bin.	6	6	0	1	1	0	1	0	1	0	0	0	-77	-77	-77	-77	-77	-77	-77	6	1	1	1	1	1	1	1	6	6	12	15	22	16	3.5	3	5.5	3.5	7
26	1	Sweden	Sweden	3	1	rock, hip-hop, world-music, pop, reggae, punk, electronic, dub and rnb	guitar	3	7	1) Some of my favorite songs are sad and sometimes i want to listen to my favorite songs. 2) i like to sing along to some of those songs. 3) i want to rediscover some favorite songs and find new things in them that i didnt notice before.	6	5	1	1	1	1	1	1	1	1	1	0	4	5	5	5	4	6	4	6	5	4	6	6	3	5	2	2	4	19	20	22	11	4.5	6	4.5	4.5	5
30	1	UK	Canada	2	1	Dance Music (House and Disco)	DJ equipement (Turntables and mixer)	2	5	Thinking about the past. Or about how much I miss my family and home.	2	5	0	0	1	0	0	0	0	1	0	0	-77	-77	-77	-77	-77	-77	-77	2	5	5	6	5	5	5	4	3	6	11	18	21	11	4.5	5.5	6.5	6	6
52	1	UK	UK	2	1	almost everything except happy hardcore,african hi-life or any overtly happy m	computer/sampler/etc	6	7	something triggers bad memories bad / painful present experiences thinking about close friends who are suffering / have died	7	5	1	0	1	0	0	1	1	1	1	0	4	7	7	6	1	7	7	7	7	1	4	4	1	1	1	1	1	14	5	9	13	1	5	6	2	6
32	2	Germany	Germany	3	1	Indie Rock, Electronica	voice, guitar	4	6	when thinking and mourning about my dead friend; when feeling lonely or depressed	5	4	1	0	1	0	0	0	0	1	0	0	6	7	6	5	6	7	7	3	5	3	6	7	7	6	6	7	6	24	23	23	26	3.5	4.5	4	3	6.5
54	2	Germany	Germany	4	1	Dance, House, R&B, Rock, Trance, Pop, Disco	-99	3	3	Remembering sad situation, p.ex. death of a person, lovers grief	3	4	0	1	1	0	1	1	0	0	0	0	-77	-77	-77	-77	-77	-77	-77	2	1	6	2	2	3	3	3	3	4	15	14	17	8	2	5.5	7	6.5	7
31	1	Italy	Italy	3	1	Rock, Indie, Brit	Guitar	2	6	When I'm relaxed: sad music is always great music	2	6	0	0	1	0	1	0	1	1	0	0	-77	-77	-77	-77	-77	-77	-77	2	5	5	4	5	3	3	3	4	5	17	20	18	12	4.5	6	6	6	6.5
40	2	UK	Germany	1	1	classic, jazz	voice	2	2	think through things	4	4	1	0	0	1	0	0	1	0	0	0	7	7	6	2	2	6	6	6	4	4	5	1	1	1	1	1	1	18	21	17	2	3.5	6.5	7	7	6.5
43	1	Germany	Germany	4	2	Klassik, Jazz, Swing	-99	4	4	schlechte Nachrichten schlechtes Wetter	6	3	0	0	1	0	0	0	0	0	0	0	-77	-77	-77	-77	-77	-77	-77	4	4	4	4	4	4	4	4	4	4	12	14	13	14	2	6	5	4	3
44	2	Germany	Germany	4	2	all	-99	4	1	i never seek out especally sad music for any situation	1	4	0	1	1	0	1	0	0	0	0	0	-77	-77	-77	-77	-77	-77	-77	4	5	4	5	4	5	5	4	4	5	22	23	20	9	5.5	5	6	4.5	4
30	1	Germany	Germany	4	1	from acoustic arab to caribbean zouk many different - non-commercial music i.g.	-99	5	6	Mostly when I'm alone, one hardly listens to sad music when in company. Sad music, unlike quit, relaxing music draws your attention to it, I don't listen to it as background music.	5	5	0	0	1	0	1	0	0	1	0	0	-77	-77	-77	-77	-77	-77	-77	6	7	7	6	6	4	4	4	5	5	19	16	20	7	5.5	6	3	5.5	5.5
27	2	UK	Brazil	4	1	MPB, Bossa Nova, Rock, Pop music	-99	4	1	I just like the music. Not a specific situation	1	7	0	0	0	0	1	0	0	0	0	0	-77	-77	-77	-77	-77	-77	-77	6	6	6	4	7	4	4	1	1	1	14	19	20	11	7	4	6.5	5	4.5
28	1	Italy	Italy	4	1	Rock/ Indie rock/ Progressive rock	Voice	3	4	-99	3	4	0	0	1	0	0	0	0	0	0	0	-77	-77	-77	-77	-77	-77	-77	2	6	4	6	6	3	3	3	7	4	15	16	17	12	5	4	4.5	4.5	5
25	2	Netherlands	Belgium	3	1	Jazz, Classical, Pop	Trumpet	3	2	-99	2	3	1	0	0	0	1	0	0	0	0	0	7	7	2	6	3	1	7	1	3	1	1	1	1	1	1	6	3	25	26	25	22	2.5	4.5	6.5	5.5	5.5
34	2	Germany	Italy	3	2	indie, rock, classic	violin	5	5	When I work hard and I have a deadline. when there is bad weather. When I walk in the city alone.	2	5	0	1	1	0	1	0	0	0	0	0	-77	-77	-77	-77	-77	-77	-77	1	2	5	5	6	6	6	6	6	6	14	23	24	10	3.5	5.5	5	5.5	6
38	2	Italy	Italy	4	2	italian songwriters	voice	1	1	-99	1	1	1	0	1	0	0	0	0	0	0	0	4	5	2	6	5	1	5	1	1	1	4	1	2	2	2	2	2	19	19	20	13	4	4.5	6.5	5	6
24	2	Germany	Germany	3	1	classic, folk, world music, singer/songwriter	djembe	6	6	in the night, drinking wine, feeling like an old poet in my single-room-apartment-when i want to enjoy the sadness, not when i'm depressiv - when my feelings don't come out, sad music helps to vent	4	5	1	1	1	0	1	0	1	1	1	0	5	5	5	5	4	7	5	5	4	3	6	4	4	6	4	6	4	21	18	21	14	5	4	6	4	6
40	1	Germany	Germany	3	1	Rock, Pop, Classic, Country, Folk	voice	2	7	Lovesickness	5	2	1	0	1	0	1	0	0	0	0	0	7	7	4	2	5	3	6	1	2	2	6	5	2	2	2	2	2	22	13	16	6	1.5	4.5	7	6	4.5
28	1	Italy	Italy	4	2	Classical, opera, indie, rock, pop	-99	5	7	When I feel nostalgic, or when I'm thinking about someone who's no longer part of my life.	6	4	1	0	1	0	0	0	0	0	0	0	4	7	6	5	4	5	5	6	6	5	5	5	4	4	4	1	1	25	19	18	17	2.5	4.5	6	4	3.5
34	1	Germany	Italy	4	1	italo disco/metal/ 80's R'n'B	-99	6	2	rainy days, quiet nights, hangover days	5	6	0	1	1	0	1	0	0	1	0	0	-77	-77	-77	-77	-77	-77	-77	7	6	7	4	4	4	4	4	5	5	26	16	24	5	3	3	6.5	2	6.5
28	1	UK	Taiwan	4	1	Rock / Electronic / Jazz / Soul / Classicals	Piano	4	6	When I feel helpless and isolated but no one is there for me to turn to, not even those people I trust.	5	1	1	0	1	0	0	0	0	0	0	0	7	7	7	7	7	7	6	7	6	7	7	7	7	7	7	7	7	19	13	22	16	2.5	4	4.5	2.5	5
45	2	Germany	Germany	3	1	jazzrock	pianao	5	5	When I feel unhappy. When I go melt with loneliness.	6	6	1	1	1	1	0	0	1	0	1	0	2	3	5	7	6	7	6	6	6	7	5	6	4	5	5	6	6	15	15	12	15	4.5	4.5	3.5	3.5	6.5
30	1	Italy	Italy	4	1	Rock music	-99	2	6	I could say that I listen sad music at evening or late night if I want to relax. Usually I listen sad music if I want to fall asleep listenig music. Anyway in both cases it don't have to be so sad.	2	2	0	0	0	0	1	0	0	0	0	0	-77	-77	-77	-77	-77	-77	-77	2	2	5	3	3	6	6	5	2	2	13	23	20	8	5.5	4.5	3.5	5	6
31	1	Germany	Italy	4	2	Tango, PopRock	Guitar, voice (both amatorial)	3	6	Moments I found myself melancholic and thinking to past memories that still raise sad feeligns	3	5	0	1	1	0	1	0	1	0	0	0	-77	-77	-77	-77	-77	-77	-77	2	3	5	1	3	5	5	5	1	5	16	26	18	16	3	4	3	3.5	6.5
27	1	UK	Taiwan	2	1	Electronic	-99	3	6	The track that had been played at a separation situation.	3	3	0	1	0	0	0	0	1	1	0	0	-77	-77	-77	-77	-77	-77	-77	5	5	7	6	7	4	5	4	4	5	17	24	16	7	6	3	3.5	6	7
30	2	Germany	Germany	4	2	Rock and Pop. broadly construed	recorder (used to play as a child)	3	3	when I am in a melancholic mood but not seriously sad. it is hard to sad whether this is a positive or a negative mood (relevant to qustions below), it is kinda both at the same time. When I feel seriously sad, I do not want to listent to music at all.	3	4	0	1	1	0	0	0	0	1	1	0	-77	-77	-77	-77	-77	-77	-77	6	5	6	5	6	1	1	1	1	2	15	17	15	17	5	3	5	2	7
33	1	Germany	Germany	4	1	Rockabilly, Rock and Roll, Progressive Rock, Hard Rock, Heavy Metal	Electric Guitar, badly.	5	6	-99	2	6	1	0	1	0	0	0	0	0	0	0	3	6	6	5	5	7	4	3	5	1	1	5	1	1	1	6	6	15	15	21	10	6	3.5	4.5	3.5	6.5
29	2	Ukraine	Ukraine	4	2	pop, rock, instrumental	I sing well.	4	3	When I want to reflect on my past.	2	3	0	0	1	1	0	0	0	0	0	0	-77	-77	-77	-77	-77	-77	-77	3	6	5	6	7	6	6	7	6	2	23	24	22	18	1	7	7	5.5	6.5
41	2	UK	UK	1	1	Rock	Drum kit	3	5	Relationship break ups	3	1	0	1	1	0	0	0	0	0	0	0	-77	-77	-77	-77	-77	-77	-77	6	5	5	6	5	4	5	3	2	6	24	25	24	7	7	7	5.5	1	7
35	1	Italy	Italy	4	2	rock music	-99	1	1	-99	1	1	1	0	1	0	0	0	0	1	0	0	6	6	5	6	6	1	2	1	2	3	4	4	4	4	4	4	2	22	26	25	11	2.5	5.5	5	3.5	6
22	1	Germany	Germany	3	1	folk-rock, country, rockabilly, indie, folk-punk, ska, electro, swing, techno	classical guitar for 12 years	5	3	driving in the car on my own, listening to johnny cash, at nighttime, when the streets are empty, but not feeling lonely, simply enjoying a non-hectic environment	5	6	0	0	1	0	0	0	0	1	0	0	-77	-77	-77	-77	-77	-77	-77	5	5	7	7	6	7	7	5	2	6	22	20	22	7	6	6.5	3	5.5	5.5
40	1	Germany	Germany	3	1	classical music	violin	7	3	weekend, evening, need for rest, day dreaming	6	6	0	0	1	0	1	0	1	0	0	0	-77	-77	-77	-77	-77	-77	-77	6	6	7	6	6	6	6	2	2	5	25	17	18	13	2.5	6.5	5.5	6	6.5
37	2	UK	UK	3	1	Rock	Voice	4	5	When I am worried about something, or want to remember someone.	5	5	1	0	1	0	1	0	1	1	0	0	5	6	5	3	5	6	5	6	6	6	5	5	3	3	3	5	5	14	16	20	15	4	5.5	6	3	4
32	2	Germany	Austria	4	1	rock, pop, oldies	-99	2	6	When I was suffering from burn out syndrome	5	1	0	0	0	1	1	0	0	0	0	0	-77	-77	-77	-77	-77	-77	-77	7	7	4	2	4	1	1	1	1	1	4	16	16	3	3	3	6.5	4	5
31	1	Germany	Germany / Peru	3	1	funk, jazz, soul, rock	guitar	2	6	if i am sad, i choose to listen to sad music to match my current mood (and maybe get the impression that i am not the only person who experiences this emotion)	6	3	0	1	1	0	1	0	1	1	0	0	-77	-77	-77	-77	-77	-77	-77	6	6	5	3	6	5	5	4	7	6	21	15	18	15	2	4.5	6.5	3	5
42	2	UK	Iran	1	1	Classics and Pop	Voice, Piano	5	7	On meditative moments, or nostalgic memories.	6	4	1	1	1	0	1	1	1	0	1	0	6	6	6	6	4	7	7	3	6	2	6	7	7	7	7	7	1	25	22	22	12	5	4.5	6.5	4.5	4.5
29	2	Italy	Italy	4	2	folk	-99	4	7	When I'm sad I seek out sad music	6	3	0	1	1	0	1	0	1	1	0	0	-77	-77	-77	-77	-77	-77	-77	3	7	7	7	4	7	7	7	4	7	22	24	19	3	6.5	3.5	6.5	4.5	6
29	1	UK	Italy	3	2	jazz, classical music	Saxophone, Guitar, voice, piano	4	4	when I'm tired when I'm blue	5	3	0	0	0	0	1	0	0	0	0	0	-77	-77	-77	-77	-77	-77	-77	4	4	6	3	4	5	4	3	3	4	17	12	19	13	4	5.5	5.5	4	5.5
56	2	Italy	Italy	3	1	Italian songs	-99	4	3	WHEN I WANT REMEMBER THE PAST	1	1	0	1	1	0	0	0	0	0	0	0	-77	-77	-77	-77	-77	-77	-77	6	5	4	6	3	6	6	6	7	6	14	23	23	16	3.5	5.5	3	6	5
25	1	UK	UK	3	1	Rock	Bass guitar	1	1	None	1	1	0	0	0	0	0	0	0	0	0	1	-77	-77	-77	-77	-77	-77	-77	1	7	4	5	4	2	5	2	1	2	19	24	16	6	4	5.5	6.5	6.5	7
45	1	Germany	Germany	4	1	Heavy Metal, Hard Rock	-99	5	7	Frustration, Being Hopeless	5	2	1	0	1	0	0	0	0	0	0	0	7	7	6	6	2	7	6	7	6	7	5	5	7	7	5	7	6	9	16	7	8	1	1	7	4.5	3.5
30	1	Greece	Greece	1	1	Classic, Choral music, pop and rock	Piano	5	7	When I think of some persons who are not in my life any more..	6	6	1	1	1	0	1	0	0	0	0	0	7	7	7	7	7	7	5	6	6	7	7	7	5	5	5	7	6	24	26	22	11	6	4.5	7	4.5	6.5
30	2	Germany	Germany	3	1	triphop, folk, reggae, rock	piano	5	7	feeling lonely, aftet break-ups, when feeling disappointment and despair	6	2	1	1	1	0	0	0	1	0	0	0	4	7	6	5	5	5	6	5	7	5	5	7	6	6	6	2	2	21	21	24	10	5	7	6.5	6.5	7
24	2	Germany	Germany	4	2	Electro, Acoustic, Singer/Songwriter	Voice	5	7	Mostly when feeling lonely or blue. It helps to feel better	6	4	1	0	1	0	1	0	0	0	0	0	5	7	6	6	4	6	6	3	7	6	5	6	4	5	4	6	6	22	23	24	14	5.5	4.5	6.5	6	4
29	1	Germany	Germany	4	2	Rock	-99	2	2	No.	5	3	1	1	1	0	1	1	0	0	1	0	5	6	5	6	5	6	5	4	5	5	4	4	3	3	3	2	3	12	13	14	10	3.5	3	6	5.5	5
23	2	Germany	Germany	2	2	electroacoustics, pop, psychedelic rock, minimal techno	voice, piano, organ (in abfallender Qualität)	3	6	when I want to calm down; when the weather is bad, but nicely melancholic in a way	3	5	0	0	1	0	1	0	1	1	0	0	-77	-77	-77	-77	-77	-77	-77	5	6	3	6	6	6	2	3	5	2	11	11	15	3	5	4.5	7	5.5	4.5
19	1	Germany	Germany	4	2	Folk, Chanson	Alto Saxophone	2	6	rising unability to cope with the fact that I am single.	3	1	1	0	0	0	0	0	0	0	0	0	2	5	2	3	1	5	2	7	6	3	5	4	1	1	1	1	1	7	16	13	16	1	4	6	6	6
34	1	Germany	Germany	4	3	claasic	-99	3	2	-99	3	3	1	0	0	0	1	0	0	0	0	0	3	3	4	3	4	3	3	4	4	3	4	3	3	4	3	3	4	12	13	14	13	4.5	3.5	4	4	3.5
40	2	Germany	Germany	3	1	folk, world music, singer/songwriter, funk, acoustic guitar, electronic	guitar	5	4	nature walks, train rides, reminiscing	3	5	1	1	1	0	1	0	1	1	0	0	5	6	6	4	6	5	6	6	6	4	5	5	4	4	4	6	5	21	21	22	12	4	6	6	6	6
25	2	Germany	Germany	3	1	Country, Folk, Rock, Pop	Piano	4	6	Let downs, fights	5	3	0	1	1	0	1	0	0	1	0	0	-77	-77	-77	-77	-77	-77	-77	5	7	5	4	5	4	4	4	5	5	19	20	24	14	2.5	4.5	5	5	4.5
26	2	Germany	Germany	4	2	Rock, Metal, Punk, Ska	-99	3	5	Since it evokes a relaxed mood for me I select sad music music to calm down before going to bed after a hard, (maybe) exciting day. Other situations are when I'm already feel relaxed or when I'm in a thoughtful mood. Or if I'm really feeling sad, it's a	4	4	1	0	1	0	1	0	1	0	0	0	4	2	6	6	7	4	4	5	5	3	5	2	1	1	1	5	5	16	20	26	11	5	6	6	5.5	6
23	2	Germany	Germany	4	2	Elektropop/Indie/alternative/house/minimal	-99	3	6	Überanstrengung, Liebeskummer, Melancholie nach einem Abschied, Sich verloren fühlen	7	3	0	0	1	0	1	0	0	1	1	0	-77	-77	-77	-77	-77	-77	-77	5	6	5	4	5	6	6	4	2	2	13	14	23	15	5.5	3	2	4.5	5.5
24	2	Germany	Germany	4	2	Rock, Pop	Voice	5	6	Sad music is usually not uptempo, so it meshes well with my mood when I'm physically tired or ill (and need to take it slow). It's also better for doing homework because it's not distracting.	6	5	1	1	1	0	0	0	0	1	0	0	6	7	5	6	5	4	4	4	6	6	5	2	4	4	4	5	4	26	14	21	10	3	3	5.5	4	5
21	2	Germany	Germany	4	2	electronic music, goa, reggae, ska	-99	4	3	there are really no specific situations. sometimes i feel in the mood for sad music without any obvious reason, just for the music	6	2	0	0	1	0	1	0	1	0	0	0	-77	-77	-77	-77	-77	-77	-77	4	3	6	5	7	7	7	2	6	6	13	15	18	11	3	5	4	3.5	6.5
25	1	Germany	Germany	3	1	jazz, rock, blues, classic, electronic, all with sub-genres	guitar	3	7	feeling lonely, thinking about the past	4	4	0	0	0	0	0	0	0	0	0	0	-77	-77	-77	-77	-77	-77	-77	6	6	6	6	5	6	6	2	2	4	17	19	22	4	4	5.5	6	6	6
20	2	Germany	Italy	4	1	Indie-Rock, Rock	Voice	3	7	When I feel sad and depressed. Mostly when I feel lonely. When I feel lonely and start thinking of people I miss and broken relationships or people who died is the most likely moment. Important: when I am depressed and/but also angry	4	1	1	0	1	0	0	0	0	0	0	0	3	6	7	7	7	6	3	1	1	5	3	4	5	7	4	3	2	28	28	22	9	3.5	6	6	2	5.5
32	1	Germany	Germany	4	1		-99	3	2	general depressive mood	5	1	1	0	0	0	1	0	0	0	0	0	1	7	2	1	1	7	4	1	5	5	7	7	4	4	4	1	1	0	19	14	8	4	3.5	6.5	6.5	5
23	2	Germany	Lithuania	4	1	Usually soulful/deep house, indie rock, sometimes chillout, rock	-99	2	6	1. Not always, but sometimes, while thinking about my mom who died only 3 months ago, I want to listen to sad music due to my mood. However, not always thoughts about mom are sad, so it is not so often. 2. At the moment I feel exhausted, alone and very	5	3	0	0	1	0	1	0	1	0	0	0	-77	-77	-77	-77	-77	-77	-77	1	4	4	5	4	5	5	4	2	1	12	16	18	9	6	3.5	6.5	4	4
29	2	Belgium	Italy	4	3	Classic pop	-99	2	5	When I'm home and it's raining and I'm reading	2	3	0	0	1	0	1	0	0	0	0	0	-77	-77	-77	-77	-77	-77	-77	1	6	5	6	1	3	5	3	2	3	20	24	24	10	4	3	1.5	4	5.5
26	1	Germany	Germany	4	1	Pop, Country, Classic	Piano	4	7	When I'm already sad I listen to sad music. That helps me express my feelings with tears (only when I'm alone). Also when I need to get a sad feeling in order to write a sad short story.	6	2	0	0	1	0	0	0	0	1	0	0	-77	-77	-77	-77	-77	-77	-77	5	5	6	7	6	5	5	5	1	1	28	15	23	16	5	5.5	5	2.5	7
31	2	Germany	Germany	4	2	Techno, House, Classic (impressionism)	Flute	2	4	thinking about the past, reflecting on time passing by I don't choose to listen to sad music, but to contemplative music that often is sad, calming me down and let my mind flow I choose to listen to specific sad songs that remind me of a special mood	3	5	1	1	1	0	1	0	1	1	0	0	6	7	5	6	2	2	3	5	4	6	5	6	2	2	2	1	1	12	24	15	16	3	5.5	6.5	4.5	5
32	1	Russia	Russia	4	2	various (pop, rock, folk, some classic music)	-99	2	6	Thinking about people who have gone whom I may associate with that music; Thinking of social injustice or evil political developments in my own country	5	3	0	1	1	0	0	0	1	0	0	0	-77	-77	-77	-77	-77	-77	-77	6	7	2	4	4	5	4	4	7	1	16	19	22	12	4	5.5	4	6	5.5
51	2	Germany	Germany	4	2	classic, rock&Pop, blues	-99	2	1	I enjoy listening but I never choose sad music	1	1	0	1	0	0	1	0	1	1	0	0	-77	-77	-77	-77	-77	-77	-77	5	5	5	5	6	6	6	6	4	6	19	18	18	11	4.5	5	5	5	5.5
23	1	Germany	UK	4	1	indie/house/hiphop	-99	3	5	When i feel like i'm alone/generally wishing i was somebody else/when i imagine smt	6	5	1	1	1	0	1	0	0	1	0	0	6	5	5	5	6	5	6	6	5	5	6	5	5	5	5	4	6	22	18	21	19	2.5	3.5	6	2.5	5
35	2	Slovenia	Spain	4	1	rock, jazz, classical, traditional, poprock	voice	2	2	-99	2	4	1	1	1	0	1	0	1	0	0	0	6	7	7	6	7	5	6	6	7	2	7	7	7	7	7	5	7	24	27	25	1	7	7	4.5	7	7
27	2	Germany	Germany	3	1	funk, rock, soul	guitar	3	6	loneliness and not seeing the blue sky for a while wonderful lonely mornings	6	2	1	1	1	1	0	0	1	1	0	0	6	5	4	5	5	7	5	4	4	5	6	5	6	7	5	6	4	14	19	18	14	5.5	4.5	3.5	5.5	5.5
34	2	Finland	Spain	4	2	Pop, rock, ska, reggae, electronic	Guitar	4	7	After breaking up with my ex Situations that reminds me of the past	5	3	1	1	1	0	0	0	0	1	0	0	1	7	5	6	3	5	6	3	4	6	5	5	3	3	3	3	5	19	21	22	10	6.5	4	6.5	5	5
58	1	Germany	Germany	4	1	rockmusic, folkmusic(am+e+spanish	-99	5	3	bad weather, illness, sitting on a beach, sitting on a mountain	2	5	1	0	1	0	0	0	1	0	1	0	6	5	2	7	1	1	6	7	6	7	7	5	5	6	4	2	6	19	22	20	7	5.5	6	6.5	5.5	7
47	1	Germany	Germany	4	2	Rock / Pop	-99	2	5	If I remember my dead friends and relatives.	3	4	1	0	1	0	0	0	1	0	0	0	6	6	2	1	5	6	4	6	2	1	6	4	2	2	2	1	1	11	12	9	17	2	4.5	3.5	3.5	4.5
54	2	Germany	Germany	3	2	Chanson,pop,gospel ,Jazz,Klassic	Vocal	4	5	when i think at lost love,sometimes grown up children,my first familily	3	5	0	0	1	0	0	0	1	0	0	0	-77	-77	-77	-77	-77	-77	-77	3	3	3	3	2	2	2	3	3	2	12	15	10	15	4	4.5	4	3.5	4
32	1	Germany	Germany	3	2	Metal, Punk, Folk, Pop	Bass Guitar	3	6	Disappointments, hard days, rainy days, winter days	5	3	0	0	1	0	1	0	0	0	0	0	-77	-77	-77	-77	-77	-77	-77	6	6	5	6	6	4	4	4	6	4	13	17	14	11	4.5	5	6	4	5.5
53	2	Germany	Germany	4	2	pop, ballads	-99	1	1	-99	2	2	0	0	1	0	1	0	0	0	0	0	-77	-77	-77	-77	-77	-77	-77	3	2	6	6	4	3	5	2	2	4	10	4	14	18	2	3.5	5	5.5	5.5
23	2	Germany	Russia/Germany	4	2	Rock, classic, alternative, independent, dance, electro	-99	4	6	When I am sad myself or have to cope with problems it helps	6	3	1	1	1	0	0	0	0	0	0	0	4	7	3	5	6	5	6	2	5	4	6	6	5	7	5	6	5	22	11	10	10	7	1.5	1	2	4
28	2	Germany	Germany	3	1	swing electro, minimal electro, ballads, pop, rock, 80s, 90s	piano	4	7	thinking on dead people,	7	2	1	1	1	0	0	0	0	0	0	0	6	7	5	7	1	7	5	6	7	6	5	5	5	6	6	1	3	16	14	19	16	6.5	4.5	5	3.5	6.5
27	2	Japan	Italy	4	1	new wave/electronic	-99	6	7	thinking about the past, emotions lost.	7	3	0	1	1	0	0	0	0	0	0	0	-77	-77	-77	-77	-77	-77	-77	4	6	5	6	6	4	3	4	5	6	20	11	16	11	2	2	3	2	6.5
24	2	Belgium	Romania	3	1	All kinds	Voice	4	7	When I want to chill	4	4	0	1	1	0	0	0	1	1	0	0	-77	-77	-77	-77	-77	-77	-77	4	6	5	5	5	6	6	6	5	6	13	17	21	14	3.5	4.5	4.5	4.5	6
29	1	Italy	Italy	4	1	Rock, any kind	-99	5	7	-99	6	6	1	1	1	0	0	0	0	0	0	0	2	6	6	6	4	4	2	1	4	3	5	5	2	2	2	5	2	20	16	21	11	2.5	5	4.5	6	6
29	2	Finland	Germany	3	1	Folk	Tin whistle	3	7	-99	7	2	0	0	1	0	0	0	0	0	0	0	-77	-77	-77	-77	-77	-77	-77	2	5	4	6	4	4	4	4	6	4	23	12	22	22	1.5	3.5	6	2.5	6
26	1	Germany	India	3	1	Classical (western and Indian), Rock(all genres), Soul, Jazz	Piano	3	6	Argument with my friends or family Bad day at work Tiffs with my girlfriend Watching something sad happen and unable to help	6	2	0	1	1	0	1	0	0	0	0	0	-77	-77	-77	-77	-77	-77	-77	6	7	4	7	5	4	6	5	2	6	28	16	28	12	3.5	7	3	4	7
21	1	Italy	South Africa	4	2	Rap, Hiphop., RnB ..Rock .. Classic.. House	-99	3	5	when I am thinking of my family and friends .. When I am depressed	4	2	1	1	0	0	1	0	0	0	0	0	5	7	5	3	1	1	3	6	5	1	4	4	5	4	4	6	4	25	14	18	14	4.5	5.5	6	4.5	6
31	2	Netherlands	Italy	4	2	rock/pop	guitar (little)	3	6	nostalgic feelings	5	2	0	0	1	0	0	0	0	0	0	0	-77	-77	-77	-77	-77	-77	-77	2	1	1	5	2	6	6	4	3	5	13	11	20	17	6.5	4	5.5	4	6
52	2	Germany	Germany	4	2	POP Music	-99	2	2	-99	4	2	0	0	1	0	0	0	1	0	0	0	-77	-77	-77	-77	-77	-77	-77	5	5	5	5	5	5	5	5	5	5	15	17	16	11	4	4.5	6	3.5	4.5
33	1	Sweden	Sweden	2	1	Classical	Piano	5	6	To relax when I'm feeling stressed	6	5	1	1	1	0	1	0	1	1	0	0	1	1	4	6	6	5	6	7	7	7	6	6	5	5	5	5	7	21	25	18	12	3.5	5.5	6.5	4	6.5
32	2	Japan	Japan	4	2	R&b / rock / classical / j pop	Piano	6	5	Remembering my previous boyfriend / wants to release my stress (sometimes making myself cry on purpose by listening to sad songs) / release myself from my work (after work etc)	7	5	0	1	1	0	1	0	0	1	0	0	-77	-77	-77	-77	-77	-77	-77	1	7	1	2	2	1	1	1	2	7	26	10	24	12	6	4.5	4	5.5	6.5
63	2	sweden	Sweden	4	1	from modern eclectro-jazz-techno, classic, tango, little Annie-typ,	dancing, improvisation, tapping rythm in any music	4	6	longing for a/my lover, when disappoined emotionally	5	3	1	1	1	0	0	0	0	1	0	0	4	5	4	2	6	7	5	5	5	5	6	5	6	4	4	4	5	18	14	15	10	7	5	2	5.5	7
25	2	Canada	France	4	2	jazz, classic, pop, rock, ballade	-99	3	5	when making crepes, it reminds me of my grandmother	5	3	0	1	1	0	1	0	0	1	0	0	-77	-77	-77	-77	-77	-77	-77	5	7	6	6	2	4	4	4	1	3	26	15	21	16	5.5	5.5	2.5	3	6
23	2	Germany	Italy	3	1	Electronic, experimental, bossa nova, folk	Voice, piano	4	7	Situations of separation, feelings of loss	7	5	1	1	1	0	0	0	1	1	0	0	7	7	7	6	6	6	6	2	6	5	7	7	7	7	7	4	5	23	21	23	17	6.5	6	5	3	5.5
59	1	Germany	Germany	2	1	about any kind	guitar	4	6	beeing away from my beloved one	5	3	0	1	1	0	1	0	1	0	0	0	-77	-77	-77	-77	-77	-77	-77	6	6	6	5	4	2	1	2	2	4	6	24	26	5	3	6.5	6.5	7	7
35	2	Italy	Italy	4	2	rock,indie pop,brit pop,ethnic,new jazz,folk	berimbau(brazilian instrument) and percussion instruments	2	6	I listen to sad music when there is a rainy day or I'm alone at night thinking of something special,touching or thinking of somone I really miss or love.	6	1	0	1	1	0	0	0	0	1	0	0	-77	-77	-77	-77	-77	-77	-77	2	3	1	6	5	2	1	1	6	6	16	17	22	13	3	6.5	5.5	6	7
33	2	Germany	Germany	3	1	Rock, Jazz, Electronica, Pop	Keyboard	3	6	when its grey and rainy outside when the music and lyrics exactly describes how i feel inside	6	6	0	0	1	0	1	1	1	0	1	0	-77	-77	-77	-77	-77	-77	-77	6	7	4	7	6	6	6	5	7	2	20	21	18	8	2	6	5	6	6.5
23	2	Germany	Germany	3	1	World music, Folk rock, Classical music, Dubstep	flute	3	7	When I was going for a walk alone in the park, enjoying the beautiful first snow of the winter. When sitting on a bus or train for a long ride and looking at the landscape rushing by. When I was sad because a friend had left the town.	7	4	0	1	1	0	1	0	1	1	0	0	-77	-77	-77	-77	-77	-77	-77	5	7	7	6	7	5	5	4	2	6	27	20	24	19	3	6.5	4	6	6.5
37	2	Italy	Italy	4	2	rock	-99	5	7	when I'm back home alone in the evening, or when I'm angry or sad	6	2	0	1	0	0	0	0	0	0	0	0	-77	-77	-77	-77	-77	-77	-77	1	5	4	6	6	7	7	7	6	6	6	14	19	6	5	4.5	4.5	6	6
34	2	Germany	Germany	4	2	worldmusic, ethnic music, classic, soul, funk, electro, alternative, singer-song	voice	4	5	Around the days of my menstruation I tend to be more emotionally intense, which can be more sad, more angry, more vulnarable compared to other days and in those days it can happen, that I choose sad music. Or if I have conflicts with my boyfriend and do	5	3	0	1	1	0	1	0	1	0	0	0	-77	-77	-77	-77	-77	-77	-77	4	7	4	4	5	3	3	3	3	3	23	15	22	13	7	5	6.5	6	7
35	1	Sweden	Sweden	3	1	techno	sequencer	2	7	undefined, light sadness. soothing effect of the music	2	4	0	0	1	0	0	0	0	0	0	0	-77	-77	-77	-77	-77	-77	-77	4	6	7	2	4	5	5	4	5	2	6	16	21	13	4.5	4.5	6	5.5	6.5
44	2	Germany	Germany	3	1	chanson, classic, metal	-99	3	5	times off changes or farewell (god and bad direction) times where I'am desired of quietness	2	5	1	1	1	0	1	0	1	1	0	0	6	6	7	7	7	2	3	2	5	6	6	5	5	5	5	4	5	18	22	18	13	5.5	6.5	6	6	5.5
23	2	Germany	Greece	3	1	postrock	guitar	1	3	-99	2	2	0	0	1	0	0	0	0	0	0	0	-77	-77	-77	-77	-77	-77	-77	2	5	4	4	4	4	5	4	3	5	15	18	21	16	4.5	4.5	3.5	4	5
25	1	Germany	New Zealand	3	1	Indie/post-punk stuff (for want of a better name)	Bass guitar	4	6	Thinking of friends back home in New Zealand who I haven't seen in a while and would love to hang out with.	4	5	0	1	1	0	0	0	1	1	0	0	-77	-77	-77	-77	-77	-77	-77	4	5	6	7	6	5	5	4	6	5	18	19	17	8	5.5	6.5	6	6.5	5.5
24	2	Iran	Iran	3	2	pop music	org	2	2	broke up with some one,losing some one	2	1	1	0	1	1	0	0	0	0	0	0	6	6	4	5	4	5	6	2	1	2	4	4	3	3	3	3	2	13	8	15	19	3.5	4	3	2.5	4
24	2	UK	United Arab Emirates	4	2	Rock, Indie, Radio	Guitar (poorly)	3	4	I avoid sad music if feeling sad or nostalgic, but listen to it if I want to relax, if I miss hearing a particular song, if I need help going to sleep	1	4	1	0	1	0	1	0	0	0	0	0	1	7	6	5	2	6	7	1	3	3	2	5	5	1	1	2	1	24	27	27	13	2.5	7	5	4	6
37	1	Germany	Germany	3	1	rock, electronica	piano	3	4	when i come home in the evening and it feels like the whole day has been some sort of messed up	5	2	0	0	1	0	1	0	0	0	0	0	-77	-77	-77	-77	-77	-77	-77	4	5	5	3	4	6	4	4	2	2	12	16	10	15	1.5	4.5	3	3	5
42	2	Germany	Italy	4	2	pop	-99	2	3	when I want to cry!	3	2	0	0	1	0	0	0	0	0	0	0	-77	-77	-77	-77	-77	-77	-77	2	7	6	7	7	7	7	7	1	1	18	21	24	18	2	4	2	2	4
27	2	Germany	Germany	2	1	electronic music, alternative, indie	piano, voice	5	6	- feeling/being lonely - thinking about sad situations in the past - without specific reason (because I like sad melodies …)	6	4	1	0	1	0	1	0	1	1	0	1	5	6	5	5	4	7	6	6	6	5	6	5	5	5	3	4	4	18	22	24	18	2.5	6	6.5	3.5	6
27	1	UK	Greece	3	1	blues, rock, alternative	voice, guitar	6	7	When I'm feeling lonely or when I want to enhance my sad feeling and get rid of them to feel better	7	4	1	1	1	0	1	0	1	1	0	0	5	6	4	6	4	7	6	5	7	7	7	7	4	4	4	6	6	20	18	23	6	5	5	5	5.5	6.5
29	1	UK	UK	3	1	Punk, jazz, blues, classical	Guitar	2	2	Following an argument or when feeling down after a particularly stressful day	3	4	1	0	1	0	0	0	0	0	0	0	5	5	6	5	5	7	7	5	5	5	5	5	6	6	5	5	4	26	25	23	4	4	6.5	5.5	6	6.5
35	1	Greece	Greece	2	1	AMBIENT,DUB,ELECTRONIC,REGGAE,ETHNIC	PERCUSSION	4	3	-99	3	4	0	1	1	0	1	0	1	1	0	0	-77	-77	-77	-77	-77	-77	-77	3	5	6	6	5	5	5	5	5	3	17	19	18	14	2.5	6	4.5	4	5
34	2	Greece	Greece	4	1	Funk, Jazz,rock,electro	-99	3	6	Feeling blue Miss someone Feeling lonely	6	2	0	1	1	0	0	0	0	1	0	0	-77	-77	-77	-77	-77	-77	-77	1	6	1	6	4	7	7	6	4	5	10	18	23	16	5	5	4.5	1.5	4
31	1	Greece	Greece	4	2	techno / trance	-99	2	3	because of her	3	2	0	0	1	0	0	0	0	0	0	0	-77	-77	-77	-77	-77	-77	-77	3	5	6	6	3	6	6	6	6	4	22	17	19	12	5	4	5	4.5	4
34	1	Greece	Greece	2	1	Rock	Guitar	6	5	Girlfriend left me, Hate my life, Family member died	6	3	1	1	1	0	0	0	0	1	0	0	6	7	4	4	2	5	3	4	4	3	3	4	5	6	6	2	2	20	17	18	7	2	2.5	6	5.5	5.5
30	2	Greece	Greece	4	1	rock pop funk gypsy music	-99	6	7	love disappointment, hurt feelings	4	6	0	0	1	0	0	0	0	0	0	0	-77	-77	-77	-77	-77	-77	-77	5	2	6	2	2	6	6	6	2	5	18	21	24	16	5	4.5	3	2.5	6
26	2	UK	Italy - UK	4	1	Electronic music in the widest sense, guitar- based pop/indie, classical, jazz	Piano	6	5	I generally like sad music so most of my music listening experiences always tend to include sad/ melancholy music.	7	6	1	0	1	0	1	0	1	1	1	0	1	2	5	4	6	4	4	7	7	4	6	6	4	4	4	5	3	23	25	25	8	6	5.5	5.5	5.5	7
39	1	UK	Greece	1	1	POP ROCK ELECTRONIC DANCE CLASSICAL	VOICE, BASS GUITAR	5	4	-99	7	5	0	1	1	0	1	0	1	1	0	0	-77	-77	-77	-77	-77	-77	-77	6	7	6	5	7	4	4	4	5	1	16	13	16	23	4	3.5	4	3	4
30	1	Greece	Greece	4	1	classic,rock,pop,jazz,goth,dark	-99	6	7	mostly when I feel depressed and lonely, when I lose hope...	7	5	0	1	1	0	1	0	1	0	0	0	-77	-77	-77	-77	-77	-77	-77	6	7	7	6	7	6	6	6	5	7	19	15	24	16	3.5	6	3	2.5	5.5
28	2	Germany	US	3	1	Indie, Hip-Hop, Classic Country, Oldies	Voice	3	4	When I'm going to sleep	5	2	1	0	0	0	0	0	0	0	0	0	5	5	3	6	2	4	5	4	5	5	5	4	4	4	4	5	1	13	18	16	11	5	3	6.5	3	6.5
20	1	Germany	Germany	2	1	classic, electronic, rock,	piano, clarinette	6	1	e.g. painting, all creative processes	2	6	0	1	0	0	1	0	1	1	0	0	-77	-77	-77	-77	-77	-77	-77	4	7	7	7	7	4	7	4	1	1	14	22	23	8	2.5	4	5	7	6.5
30	2	Greece	Greece	4	1	Rock, Pop, Metal, Folk	Piano	5	5	In the evening when I am at home and I feel depressed / lonely.	5	3	1	0	0	0	0	0	1	1	0	0	6	3	6	6	5	6	5	2	6	5	6	5	6	6	6	6	3	23	23	23	14	4.5	7	7	3.5	6
28	2	Greece	Greece	3	1	ELECTRONIC	drums	2	7	lonliness, sad situations	3	1	1	0	1	0	0	0	0	0	0	0	2	6	5	5	5	7	7	1	2	6	2	3	5	4	3	6	6	13	17	20	10	3	5	6.5	5.5	6.5
25	2	Germany	Germany	3	1	Classical, Indie Pop	Voice	3	5	When I am on a train, when I work and have to do something dull	5	5	0	1	1	0	1	0	0	1	0	0	-77	-77	-77	-77	-77	-77	-77	5	5	6	6	6	4	4	4	3	2	13	20	19	12	6	4.5	6	6	5
28	2	Germany	UK	3	2	Classical and Popular	Flute	2	5	When feeling melancholic, calm, overwhelmed, thoughtful or anxious. For example, when dealing with new experiences, when finding things difficult.	5	5	1	1	1	0	1	0	1	0	0	0	2	2	5	6	6	5	4	6	5	4	4	3	4	4	4	3	4	24	19	20	15	3.5	6	6	3.5	6
25	2	France	Italy	4	2	alternative	-99	5	2	while working while i'm just relax in my room	1	5	0	1	1	0	1	0	0	1	0	0	-77	-77	-77	-77	-77	-77	-77	5	6	5	4	6	4	5	5	6	5	25	16	8	12	3	3.5	7	5.5	6.5
26	2	Germany	Ukraine	4	2	Indie-Rock, Alternative Rock	-99	4	6	Fight with my Boyfriend/Friends/Parents, problems at work, tests at the University, thinking about the past/future/missed pportunities/wrong decisions	6	4	1	0	1	1	0	0	0	0	0	0	7	7	6	6	4	6	7	2	1	6	5	3	5	5	5	5	6	19	4	19	18	6	2	4	3.5	6.5
30	2	Germany	Germany	4	1	Dance, Rock, Pop	guitar	2	6	after an argument, a loss of a dear person	4	2	1	0	0	0	1	0	0	0	0	0	5	5	5	5	4	6	5	6	5	2	4	5	5	5	2	6	6	21	15	15	13	4	2.5	6.5	2	5.5
28	2	Belgium	Italy	3	1	classic, rock, metal	piano and guitar, but very badly	5	5	sometimes I feel nostalgic and I want to enphasize my mood. just an act of soft autolesionism I guess... sometimes I decide to listen to sad music only for aestetic reasons. a lot of good music is indeed quite sad.	6	6	1	1	1	0	1	0	1	1	0	0	4	7	6	6	6	6	5	6	6	5	6	6	5	6	5	4	4	23	28	15	9	4.5	3.5	5.5	3.5	6.5
21	1	Italy	Italy	4	1	both, dance 80', 90'	-99	1	1	-99	1	2	0	0	1	0	0	0	0	0	0	0	-77	-77	-77	-77	-77	-77	-77	1	4	4	4	4	5	5	5	5	5	13	20	20	11	3	4	4.5	4	5
24	1	Greece	Greece	3	1	hip hop	-99	6	7	periods of high stress levels	7	2	1	1	1	1	1	0	1	0	0	0	5	7	1	4	4	3	1	5	4	5	3	4	5	5	5	2	2	22	19	20	14	3	5	6	2	4.5
23	2	Italy	Italy	2	1	rock	piano	6	6	I usually listen to sad music when I' m on th bus or when I have to walk very much	7	4	0	0	1	0	0	0	0	0	0	0	-77	-77	-77	-77	-77	-77	-77	4	2	4	4	4	7	7	7	5	4	24	22	16	12	4.5	2.5	6	3.5	4
24	2	Italy	Italy	3	1	Classic, Opera, Soundtrack, Rock	Voice	4	7	-99	6	2	0	1	1	0	0	0	1	0	0	0	-77	-77	-77	-77	-77	-77	-77	3	2	5	7	3	4	4	4	7	7	24	16	21	16	3	4	5.5	1.5	7
23	1	Italy	Italy	3	2	Metal	Guitar	4	6	When I remember of my past, especially when I remember my past love stories	4	3	0	1	1	0	0	0	0	0	0	0	-77	-77	-77	-77	-77	-77	-77	3	5	5	6	6	4	5	4	5	6	24	15	18	18	6	3.5	5	3.5	4.5
24	2	Greece	Greece	3	1	indie	guitar	5	3	when i want something with not much volume to listen when i am tired	5	5	0	1	1	0	1	0	0	1	0	0	-77	-77	-77	-77	-77	-77	-77	5	6	3	3	5	6	6	3	4	4	20	19	21	15	3	3	6	2.5	3
26	1	Greece	Greece	4	1	rock	-99	3	7	break up	5	2	1	1	1	0	0	0	0	0	0	0	7	7	5	5	5	7	6	1	1	1	5	5	7	7	5	5	5	21	14	15	17	3.5	3.5	4.5	3.5	5
30	2	Greece	Greece	4	1	jazz,funk	voice	4	5	feeling lonely ,i feel love or lost the love	3	2	0	1	1	0	0	0	0	0	0	0	-77	-77	-77	-77	-77	-77	-77	5	6	2	5	6	4	4	4	4	4	8	21	21	7	3.5	6	3.5	6	6
33	2	Austria	Austria	1	1	Jazz	Saxophone	1	2	-99	2	5	0	1	1	0	0	0	0	0	0	0	-77	-77	-77	-77	-77	-77	-77	1	2	1	6	7	5	2	1	1	2	12	28	23	16	3.5	6	5.5	4	6.5
57	2	UK	Australia	4	2	50's and 60's	-99	4	6	Bored and lonely .	5	5	0	1	1	0	1	0	1	0	0	0	-77	-77	-77	-77	-77	-77	-77	5	6	6	6	6	6	6	6	6	6	10	20	19	10	4	4.5	5	6	4
21	2	Italy	Italy	4	2	folk	violin	4	7	-99	7	4	1	0	1	0	1	0	0	0	0	0	6	7	6	5	2	7	5	2	7	2	5	5	6	5	4	4	6	26	20	17	16	6.5	3.5	5.5	4	4
29	1	Greece	Austria	2	1	House , Techno , Jazz and Classical music	Piano , Guitar	4	5	Relaxing , thinking something sad .	6	5	0	1	1	0	1	0	1	0	0	0	-77	-77	-77	-77	-77	-77	-77	6	6	2	6	2	1	5	3	6	1	19	20	18	12	5	6.5	5.5	5	6.5
27	1	Germany	Germany	3	1	Classic, rock music	Viola	5	5	Nach einer Situation in der ich mich schlecht fühle.. Manchmal aber auch nur, weil ich den Klang der Melodie oder den Text schön finde.	4	5	0	0	1	0	1	0	0	0	0	0	-77	-77	-77	-77	-77	-77	-77	6	5	4	6	5	4	4	3	5	3	13	12	11	11	3	5.5	5	3.5	4.5
34	2	Brazil	Brazil	4	1	rock, experimental	-99	3	7	When Im sad I do like listening sad songs to feel worse, however, I can listen to a sad song, just because I like it, independently on my mood.	7	5	1	1	1	0	0	1	0	0	0	0	5	7	3	6	1	7	4	3	5	3	6	6	1	1	1	1	1	12	19	14	10	3.5	3	2	1.5	5
27	2	Germany	UK	4	2	Indie, Classical, Folk	Piano	1	1	-99	1	3	0	0	1	0	1	0	0	0	0	0	-77	-77	-77	-77	-77	-77	-77	5	2	4	5	1	4	4	4	1	4	25	10	20	17	3	4	5.5	3.5	6
26	2	Germany	Australia	1	1	World, Alternative, rock	Double Bass	4	6	When I am hyperactive or stressed, I choose sad music to help me become more grounded and relaxed.	6	2	0	1	1	0	1	0	0	0	0	0	-77	-77	-77	-77	-77	-77	-77	6	7	2	5	3	2	2	2	5	6	19	20	24	14	1.5	5	6	4	6.5
25	2	Germany	Germany	4	2	electronic music, hip hop	flute-.-	3	3	hard familiary situations,	6	4	1	0	1	0	0	0	1	0	0	0	1	4	3	2	4	6	6	6	5	5	6	6	5	3	6	5	6	18	16	14	16	4	4.5	4	3.5	5
44	1	Italy	Italy	4	2	Rock and pop music	-99	3	3	-99	4	6	1	1	1	0	1	0	0	0	0	0	5	3	2	6	1	6	2	4	5	5	5	4	5	5	5	2	2	15	26	15	8	4	3.5	5	5.5	3
24	1	UK	UK	3	1	Psychedelia, Psytrance, Acoustic, to name a few	Guitar	3	5	-99	2	5	0	0	0	0	1	1	0	0	0	0	-77	-77	-77	-77	-77	-77	-77	5	5	6	5	4	3	2	2	4	5	19	21	24	5	4.5	5	6	6	7
34	2	Greece	Greece	4	2	Jazz	-99	4	6	Bad mood	6	5	0	0	1	0	1	0	1	1	0	0	-77	-77	-77	-77	-77	-77	-77	4	5	5	6	6	4	4	5	4	3	15	23	22	7	4	6	7	4	6.5
29	2	France	Italy	1	1	Opera	Voice	3	6	-99	3	4	0	0	1	0	0	0	1	0	0	0	-77	-77	-77	-77	-77	-77	-77	1	5	1	7	2	5	6	4	7	7	28	19	26	14	6.5	6.5	5	3	7
27	2	Greece	Greece	4	1	rock	-99	2	4	In times when I want to indulge into my sad emotions.	3	2	0	1	1	0	1	0	0	0	0	0	-77	-77	-77	-77	-77	-77	-77	5	6	6	6	6	6	6	6	5	3	16	18	18	11	6	6.5	6	3	6
22	2	Greece	Greece	4	1	garage/surf/post rock, indie, jazz	-99	3	5	lonelyness, after fighting with a good friend/boyfriend, PMS, failing at something (ex: studies, exams)	6	4	0	0	1	0	1	0	1	1	0	0	-77	-77	-77	-77	-77	-77	-77	4	5	5	3	4	6	5	4	4	5	18	19	18	11	5	5.5	5.5	4	5
28	1	Italy	Italy	4	1	Indie rock	Guitar	4	2	It's not connected with my mood, so there aren't specific situations in which i seek out sad music.	2	5	0	0	1	0	1	0	0	0	0	0	-77	-77	-77	-77	-77	-77	-77	6	6	7	4	5	4	4	4	2	1	5	16	14	17	4	3.5	4.5	5.5	4
29	2	Spain	Greece	4	2	jazz, rock, indie, reggae	-99	3	5	-99	5	2	0	1	1	0	0	0	0	1	0	0	-77	-77	-77	-77	-77	-77	-77	6	2	4	5	3	2	2	2	1	5	19	15	24	17	4.5	4.5	4.5	3.5	4.5
29	2	Portugal	Greece	4	2	Rock, Indie	-99	5	6	Break up Problems with work Problems with family	4	3	1	0	1	0	1	0	1	0	0	0	6	7	5	6	5	6	6	2	2	4	3	5	6	6	4	1	3	19	12	22	13	5	3.5	6	3	4.5
30	2	Italy	Italy	4	2	classical, pop	-99	3	4	when I am happy I select sad music	2	4	0	0	1	0	0	0	1	0	0	0	-77	-77	-77	-77	-77	-77	-77	2	6	6	4	3	2	2	5	7	5	23	18	15	19	4.5	5	4	2.5	6
24	2	Netherlands	Greece	4	2	Rock	Voice	5	6	feeling sad	6	3	1	0	1	0	1	0	0	1	0	0	5	5	6	6	6	7	2	7	7	3	4	4	4	4	4	6	3	16	26	18	5	2	6	5.5	4	6.5
47	1	Germany	Germany	3	1	Everything with wide dynamics, complex beats/riffs, repetive patterns.	voice	2	2	I maybe did that when in adolescence, to bathe in melancholy, to moon-tan. There are sad tracks on otherwise not so sad albums. As soon as s sad one is on, I dive into it like back then.	3	5	0	1	1	0	0	1	1	1	0	0	-77	-77	-77	-77	-77	-77	-77	4	5	6	7	7	6	6	6	7	5	18	17	17	15	6.5	2.5	4	2.5	6
28	2	Greece	Greece	4	1	indie rock, progressive rock, art pop	piano	5	6	Love problems, loneliness, bad weather	5	4	0	0	1	0	1	0	0	0	0	0	-77	-77	-77	-77	-77	-77	-77	3	5	2	5	4	4	3	5	3	5	19	13	19	14	5	4.5	3.5	4	4.5
28	2	Greece	Greece	4	2	CLASSIC, JAZZ, BLUES, POP, ETHNIK	PIANO	5	5	WHEN FEELING NOSTALGIC	4	3	0	1	1	0	1	0	0	0	0	0	-77	-77	-77	-77	-77	-77	-77	5	6	5	4	4	5	5	4	5	4	20	21	20	15	3.5	6	4.5	4	4.5
27	1	Germany	Greece	3	1	rock, blues	piano	4	6	When I think about good/bad times in the past (nostalgia). After I have seen a sad/war movie.	6	5	0	1	1	0	1	0	0	1	0	0	-77	-77	-77	-77	-77	-77	-77	5	7	6	6	7	2	6	3	1	6	19	19	18	16	3	5.5	6	3.5	5
25	2	Netherlands	Greece	4	2	indie	-99	4	6	rainy days late night alone	6	2	0	1	1	0	0	0	0	0	0	0	-77	-77	-77	-77	-77	-77	-77	5	2	3	6	7	7	7	7	6	6	21	19	23	10	5.5	4.5	4.5	6	4.5
28	2	Greece	Greece	4	1	SOUL, JAZZ, CLASSIC, ROCK	-99	6	6	FEELING LONELY, ANGRY	5	5	1	0	1	0	1	1	0	0	1	0	4	6	6	5	2	7	5	6	6	5	6	5	5	5	5	1	5	14	18	22	14	4.5	5.5	4.5	3	5.5
24	2	Netherlands	Greece	4	1	Deep house, electronic, hip hop, rock, jazz, classical	piano	1	1	-99	1	1	1	0	0	0	0	0	0	0	0	0	7	7	6	4	2	6	4	1	2	4	3	4	6	4	5	2	2	11	21	18	12	5.5	4	6	4	6
25	2	Greece	Greece	3	2	post rock	used to play the flute	6	6	feeling lonely, being sad abut a current situation, break up, missing somebody	6	6	0	1	1	0	1	0	1	1	0	0	-77	-77	-77	-77	-77	-77	-77	5	6	7	7	7	5	5	6	7	7	21	21	22	17	5.5	4	6.5	4	6
25	1	Netherlands	Greece	4	2	electro (dark wave, synthpop, dub, industrial), hip-hop, triphop, folk,ethnic	-99	5	3	In the evening but before night, when travelling alone after a difficult day	4	5	0	0	1	0	0	0	0	1	0	0	-77	-77	-77	-77	-77	-77	-77	5	6	7	6	7	5	5	4	2	2	13	14	17	11	4	3.5	5.5	2.5	5
30	1	Greece	Greece	3	1	classic rock, alt. rock, new wave, trip-hop, jazz, classical, minimal, trance	piano, guitar, saxophone, clarinet	3	2	Bad day at work, break-up, after watching a sad film.	2	2	0	0	1	0	0	0	1	0	0	0	-77	-77	-77	-77	-77	-77	-77	1	4	1	5	5	2	2	2	2	2	21	24	14	5	4.5	4	3	4.5	7
25	1	Netherlands	Greece	4	1	Heavy metal,rock,greek music	-99	6	7	Its simply better and more feeling-influencial than happy music	7	6	1	1	1	0	0	0	1	1	0	0	4	7	5	6	6	6	5	1	6	5	7	5	4	4	4	1	4	14	14	14	14	4	4	4	4	4
25	1	Switzerland	Greece	4	1	Post Rock, Indie, Post Punk, Ambient	-99	6	4	It's a great soundtrack to whatever I'm doing when I'm alone	6	5	0	0	1	0	1	1	0	1	0	0	-77	-77	-77	-77	-77	-77	-77	5	6	5	6	4	6	3	3	5	5	11	18	15	10	2.5	3.5	2	5.5	4
20	1	Netherlands	Brazil	4	2	Rock, brazilian music	-99	3	6	Feeling homesick	5	2	0	0	1	0	1	0	0	0	0	0	-77	-77	-77	-77	-77	-77	-77	2	6	5	5	6	4	4	4	4	5	18	14	15	13	3.5	5.5	4	4	4.5
29	1	Netherlands	Greece	4	1	(indie)rock, instrumental(and soundtracks), ethnic,pop	-99	4	6	Loss of a friend, family issues	5	2	0	1	1	0	0	0	0	0	0	0	-77	-77	-77	-77	-77	-77	-77	6	6	5	5	6	5	6	5	5	5	13	18	22	8	4.5	4.5	4.5	5	5.5
24	1	France	Greece	3	1	metal, rock, folk, classical, electronic	guitar	5	7	-99	6	2	1	1	1	0	0	0	1	1	0	0	6	6	7	7	1	2	6	2	7	7	7	7	7	7	7	7	7	28	7	19	10	6.5	6	7	1	5.5
24	2	Slovakia	Greece	4	2	alternative,rock,rock	-99	4	3	usually when i think about someone that i miss or not have..	5	3	0	1	1	0	0	0	1	0	0	0	-77	-77	-77	-77	-77	-77	-77	3	2	6	3	5	5	5	5	2	2	19	15	24	11	5	4	6.5	3	6
30	2	UK	Greece	4	1	electronic music (minimal tech to progressive trance)	piano	3	6	missing somebody. after having a loss of whatever kind.	5	2	0	0	1	0	1	0	0	0	0	0	-77	-77	-77	-77	-77	-77	-77	1	2	4	5	6	6	6	6	2	2	14	17	20	12	6.5	6	7	5	7
27	2	UK	Greece	3	1	Classical Music, Jazz, Post-rock	Piano	6	2	Having to complete mundane tasks, or feeling bored	2	5	0	0	1	0	1	0	0	1	0	0	-77	-77	-77	-77	-77	-77	-77	2	5	7	7	4	7	7	6	7	6	15	24	20	11	4	6.5	3.5	4	3
23	1	Italy	Italy	2	2	Rock, Metal,	Drums, Voice	2	5	After an argue with my girlfriend, or after a bad day	6	3	0	0	1	0	0	0	1	0	0	0	-77	-77	-77	-77	-77	-77	-77	3	3	4	6	5	5	4	3	3	3	20	11	13	14	1.5	4	6	3	5
28	2	Germany	Greece	4	2	World, Indie, Pop, Folk	-99	4	6	When I want to read a book, When I want to relax, or want to do a paralell activity while listening to music, when i want to think bad or good things	6	4	0	1	1	0	1	0	0	1	0	0	-77	-77	-77	-77	-77	-77	-77	4	7	3	5	4	6	5	4	1	1	18	23	27	13	6	4.5	6	2.5	5.5
27	1	Netherlands	Greece	3	1	Classical, minimalism, post rock	piano	3	5	-99	5	4	0	1	1	0	1	0	1	1	0	0	-77	-77	-77	-77	-77	-77	-77	5	6	7	7	6	6	5	4	2	1	16	20	18	12	4	3.5	5.5	4.5	5.5
28	2	UK	Greece	4	1	rock	-99	6	6	when i wake up and i'm in a bad mood bad weather when i'm next to the sea	2	5	0	1	1	0	1	0	0	1	0	0	-77	-77	-77	-77	-77	-77	-77	5	4	4	4	4	2	2	2	5	5	10	17	20	20	3.5	5	4.5	4	5
16	2	Greece	Greece	4	1	rhard rock,art rock,alternative rock	-99	4	6	when i remember very happy moments of the past that i'm not able to have now,or a person that i love and really miss	4	2	1	0	1	1	0	0	0	0	0	0	3	6	7	4	3	6	1	3	6	3	3	5	6	6	6	3	1	9	10	21	20	3.5	4.5	5.5	2	4
25	1	Greece	Greece	4	2	Rock, Metal, Ethnic	-99	3	5	Dead relatives. Past love.	3	2	0	0	1	0	0	0	0	1	0	0	-77	-77	-77	-77	-77	-77	-77	2	4	5	5	2	6	6	6	3	2	14	16	15	18	4	4.5	3.5	3.5	5
26	2	UK	Greece	1	1	ROCK	PIANO	5	6	REMINISCING OF PAST SITUATIONS THINKING OF BOYFRIEND OR EX-BOYFRIEND	3	5	0	1	1	0	1	0	1	1	1	0	-77	-77	-77	-77	-77	-77	-77	4	6	5	7	6	6	6	4	5	7	22	23	26	10	6	5.5	4.5	4.5	6
28	2	Germany	Germany	3	1	folk, jazz, blues, hip hop, trip hop, rock, indie, singer-songwriter	piano	5	7	Right now. I feel lonely and I miss my partner. lovesickness, feeling lonely, missing my family, wanting to feel sad,...	5	5	1	1	1	0	1	0	0	0	0	0	6	7	7	7	5	7	7	6	6	6	7	7	7	7	7	3	2	23	18	26	10	6	6.5	3	2	7
25	1	Netherlands	France	3	1	rock, jazz	guitar	4	5	rainy weather,feeling moody	4	3	0	0	1	0	0	0	0	0	0	0	-77	-77	-77	-77	-77	-77	-77	5	4	6	5	4	4	4	4	2	2	23	22	24	10	2	5.5	5	5.5	6
32	2	Greece	Greece	4	1	Rock,Jazz	-99	3	6	When I feel lonely or extremely emotional After a breakup After a business failure	5	2	1	1	1	0	0	0	0	0	0	0	6	7	5	6	5	6	6	4	3	3	5	6	5	4	4	4	4	12	16	22	13	2	5.5	6	3.5	3
36	2	Greece	Greece	4	3	sountracks, downtempo electronica, indie pop	-99	5	6	after a break up, during the holy week of Easter	4	5	0	1	1	0	1	0	0	0	0	0	-77	-77	-77	-77	-77	-77	-77	5	6	2	6	5	5	5	5	2	2	15	15	16	10	6	5.5	4	4.5	6
24	2	Spain	Spain	1	1	Classical music	Piano	3	6	I listen to sad music when I want to feel emotions.	7	3	1	0	1	0	1	0	1	0	0	0	4	2	7	7	2	2	7	7	7	4	6	6	4	6	4	4	6	24	19	24	19	2	3	4	1	6.5
26	1	Netherlands	Singapore	4	1	Experimental, post-rock, electronic, folk	-99	3	5	When I want to feel.	4	1	1	0	1	0	0	0	0	0	0	0	5	2	6	7	3	7	4	3	3	6	5	7	2	1	1	2	3	7	7	18	13	3	3.5	3.5	5.5	6
46	1	UK	UK	3	1	post-rock, progressive rock, experimental electronic, classical, jazz	keyboards	6	2	-99	6	6	0	1	1	0	1	0	1	1	1	0	-77	-77	-77	-77	-77	-77	-77	2	5	7	4	4	4	4	4	5	5	20	14	24	17	2.5	4.5	3	4.5	7
21	1	UK	UK	4	1	R'n'b, Bashment, Hip Hop	-99	4	7	During a break up When an argument occurs	7	3	1	0	1	0	1	0	1	0	0	0	5	6	7	7	7	7	7	6	6	7	6	6	5	4	5	7	7	22	18	19	19	2.5	4	4.5	5	2.5
31	2	UK	UK	4	1	Rock, Folk	-99	5	3	I dance ballet and contemporary, so dancing is often a situation in which i'd listen to sad music. This extends to listening to any pieces of sad music that i would dance to, outside oft eh dance studio - for example I'd listen to a sad song on repeat at	6	6	0	1	1	0	1	0	1	0	0	0	-77	-77	-77	-77	-77	-77	-77	3	6	7	4	5	7	7	6	2	5	24	16	20	10	5.5	4.5	4	2	3.5
59	2	UK	UK	2	1	Classical, contemporary, baroque	clarinet, piano	4	3	-99	4	5	0	0	1	0	1	0	1	1	0	0	-77	-77	-77	-77	-77	-77	-77	6	5	5	5	5	6	6	6	6	5	14	14	17	10	1.5	3.5	4	4	6
32	2	Canada	Canada	2	1	Classical	Piano	4	5	During a break up	4	5	1	0	1	0	0	0	1	1	0	0	5	5	6	7	6	4	5	3	4	5	5	3	7	7	7	2	6	14	21	20	12	5	5.5	5	4.5	7
27	1	Greece	Greece	4	2	pop	-99	2	3	After a separation with my girlfriend	3	2	1	0	1	0	0	0	0	0	0	0	4	6	5	2	1	2	5	2	4	3	6	5	5	6	6	1	3	12	19	18	10	3.5	5	5.5	5.5	4
40	1	UK	UK	3	1	Soul, Jazz, Folk, Classical	Guitar	4	7	Feeling lonely. Facing difficulties.	6	3	0	1	1	0	1	0	0	0	0	0	-77	-77	-77	-77	-77	-77	-77	7	6	5	7	6	4	4	4	5	7	9	20	22	11	3.5	5.5	6	5	5.5
38	2	US	Canada	1	1	Classical and French-language popular music	Piano	3	7	- Thinking of a friend or family member who has passed away - Feeling nostalgic about my youth - Missing my friends/family	5	3	1	0	1	0	0	0	1	0	0	0	5	7	5	6	4	4	4	4	6	4	5	4	4	5	4	1	2	19	17	24	9	6	4.5	6.5	4.5	6.5
46	2	UK	UK	1	1	Classical	Piano	5	6	When tired and depressed!	6	6	1	1	1	0	1	0	1	1	0	0	3	6	6	6	5	5	7	5	5	6	6	6	6	6	6	3	5	21	20	27	13	1.5	6	7	3.5	6.5
68	1	UK	UK	4	2	Pop rock / early rock 'n' roll 1955-63	Piano	2	1	Needing to feel at one with the universe.	4	6	1	1	1	0	1	0	1	0	0	0	1	1	1	1	1	1	1	5	7	3	7	7	4	4	4	2	2	6	15	14	14	1	3.5	5	4.5	5.5
25	1	UK	UK	2	1	Electronic dance music, neo-classical music, hardcore punk	Voice	6	2	Breaking up with a partner, hearing of a death close to the family.	6	7	1	1	1	0	0	1	0	1	0	0	4	5	6	6	6	5	5	4	6	6	7	6	3	3	6	6	4	16	21	15	10	6	2.5	4.5	5	5.5
64	2	US	US	4	1	middle of the road popular and semi classical	-99	3	5	When I am in a contemplative mood, when I am feeling the weight of the world on my shoulders, when I am a very emotional mood.	4	4	0	0	1	0	0	0	0	1	0	0	-77	-77	-77	-77	-77	-77	-77	3	5	4	6	2	7	7	3	2	6	23	19	17	11	1.5	7	6.5	4.5	6
21	2	UK	France	3	1	progressive, psychedelic rock	voice, piano	5	5	I sometimes listen to the music I used to listen when I was affected by depression, I can remember the feelings, the despair I felt during such time. However, I don't recover such feelings, rather, i can feel the difference between the now and the then.	6	5	1	0	1	0	1	0	1	0	0	0	3	7	7	6	6	1	5	1	3	2	5	5	6	7	4	7	5	17	19	20	16	3	6.5	4	2.5	5.5
23	2	UK	UK	2	1	Classical	Violin	3	6	After a break-up	5	2	1	0	1	0	1	0	1	0	0	0	5	7	6	5	7	4	7	7	7	2	6	3	1	1	1	6	4	11	23	21	11	6	4.5	7	6	6.5
43	2	US	US	4	1	heavy metal/rock	-99	5	7	grief	7	2	1	0	1	0	0	0	1	0	0	0	5	7	4	6	6	6	7	6	6	6	6	6	6	6	6	6	6	15	23	18	8	2.5	6.5	6.5	7	6.5
18	2	US	US	4	2	indie	-99	4	7	- thinking about bad past events - needing to vent	7	3	1	0	1	0	1	0	1	0	0	0	5	7	6	4	1	7	6	5	7	7	7	6	7	7	3	7	7	25	25	26	13	4.5	5	3	2	6.5
22	1	US	US	4	1	alt rock	voice	3	7	rainy days, late at night,	7	2	1	1	1	0	1	0	1	0	0	0	5	7	2	1	3	7	7	5	7	7	7	5	7	7	7	6	7	23	25	17	3	4.5	3	6.5	6	7
28	1	Japan	Japan	2	1	Classical, Jazz	Violin	6	5	When a person I feel attached die.	7	5	0	1	1	0	1	1	1	1	0	0	-77	-77	-77	-77	-77	-77	-77	6	7	6	7	7	7	7	7	5	7	25	23	21	10	2.5	6	5	5.5	6.5
31	2	Japan	Bulgaria	4	1	electro, ambient, experimental, jazz, ethno	-99	4	3	I don`t regard music as sad, rather as emotional and introvert. Journey to oneself. Therefore when I want to experience something deep and emotional I listen to sad music.	5	5	0	1	1	0	1	0	1	1	0	0	-77	-77	-77	-77	-77	-77	-77	4	5	4	7	7	7	7	7	6	4	22	28	25	10	6	7	4.5	4.5	7
20	2	UK	UK	4	1	K-pop, American pop, British pop.	-99	3	7	When I'm in love but it's unrequited, I listen to tons of sad love songs!	6	2	0	1	1	0	1	0	0	1	0	0	-77	-77	-77	-77	-77	-77	-77	5	7	6	6	6	4	4	4	4	3	19	14	17	19	4	3	2	3	6
27	1	UK	Italy	3	1	Electronic Music, Synth-Pop, Indie	Guitar	3	6	rainy day, or to wind down after a long day	5	5	0	1	1	0	1	0	0	0	0	0	-77	-77	-77	-77	-77	-77	-77	6	6	4	6	6	4	4	4	5	5	17	19	23	13	4.5	5	4	4	5.5
26	2	Germany	Japan	3	1	Classic and Jazz	Singing and playing the flute	4	2	-99	4	5	0	0	1	0	0	0	1	1	0	0	-77	-77	-77	-77	-77	-77	-77	4	5	6	5	4	4	4	4	1	5	20	14	18	13	5.5	3.5	5	3.5	6.5
28	2	UK	UK	3	1	Heavy metal, classic rock, punk, goth, prog	Voice	3	7	Feeling depressed, worrying about the future, reading bad news that may have an impact on my life.	7	3	1	0	0	0	0	0	1	0	0	0	5	5	6	5	5	4	7	7	7	2	5	6	5	5	5	7	4	25	14	9	18	2	3	4.5	2	6.5
28	2	Greece	Greece	4	2	indie pop	-99	5	4	home alone	5	5	1	1	1	0	0	0	0	0	0	0	2	3	2	5	5	5	4	3	2	3	4	5	5	4	5	6	6	22	12	22	18	4.5	3.5	6	4	6.5
53	2	US	US	4	2	80's all types	guitar and voice	3	4	In the past I have listened to music that made me sad after a breakup	4	2	0	0	1	0	0	0	0	0	0	0	-77	-77	-77	-77	-77	-77	-77	1	4	7	2	5	6	6	6	1	1	12	21	26	5	6	6.5	6.5	6	6.5
22	2	Japan	US	3	1	Classical, Pop	Violin	6	5	I like to listen to sad music when I go on walks. Usually I like to listen to it when I'm feeling sad already, but sometimes I listen to it when I'm happy, then I feel forlorn and happy at the same time and it's weird.	6	5	1	1	1	0	1	0	0	1	0	0	7	7	7	7	7	7	7	6	7	7	7	7	7	7	7	7	7	26	10	18	16	3	5	3	1.5	7
16	1	US	US	2	1	Indie, Rock, Jazz, Folk, Classical	Piano or voice	4	6	Coming home after a rough day and I just want to wallow in my sadness. Often, though, I try to listen to happy music to pep me up after a bad day.	4	5	1	0	1	0	0	0	1	0	0	0	6	7	2	5	3	7	4	2	2	5	6	2	7	7	6	5	2	21	18	22	11	7	6.5	5	5.5	6.5
65	2	US	US	4	2	varies, but usually quieter or older rock and roll	accordion and trumpet but many years ago; I sing constantly	3	6	remembering someone who died whom I loved; feeling lonely	6	2	0	1	1	0	0	0	1	0	0	0	-77	-77	-77	-77	-77	-77	-77	2	7	4	4	6	4	4	4	2	4	24	26	21	4	7	7	5.5	7	7
28	2	Germany	Ireland	3	2	Classic, Pop, R&B,... (almost all except heavy stuff, e.g., metal, rock)	Piano, recorder	2	5	Depends on the definition of sad music. Maybe to wind down, relax.	2	2	1	1	1	0	1	0	0	0	0	0	6	6	5	7	6	7	6	2	3	3	5	5	6	6	5	5	5	18	19	26	20	2.5	7	5.5	3	7
19	1	US	US	4	1	rap/ hip-hop/ pop	-99	4	6	death in family bad day	6	2	1	0	0	0	1	0	1	1	0	0	7	7	5	6	5	4	5	6	6	6	7	5	5	4	4	6	5	16	19	20	14	5	3.5	6.5	4.5	5.5
18	2	US	US	4	1	Alternative, indie	voice	4	7	When I'm having a bad day When something upsetting happens When my long distance relationship is stuggling	6	2	1	0	0	0	0	0	0	1	0	0	7	7	5	6	5	7	5	5	7	7	6	5	4	4	4	2	3	24	20	23	15	6	7	6.5	6	6.5
29	1	UK	UK	4	1	Jazz, Hip-Hop, Electronic, Soul	Drums / Percussion	3	6	Often background music when I am doing work, I may choose sad music.	4	5	1	1	1	0	1	1	1	1	0	0	5	5	2	5	5	6	6	5	3	6	5	4	4	4	4	6	3	15	17	23	10	4	3.5	6.5	5.5	7
18	2	US	US	3	1	indie, pop, rock	voice	4	6	-99	6	3	0	0	1	0	1	0	1	1	0	0	-77	-77	-77	-77	-77	-77	-77	4	5	4	7	6	5	5	4	7	6	23	18	26	16	1.5	6.5	5.5	3.5	7
59	2	US	US	4	1	Almost all genres, except for opera, heavy metal, and progressive jazz.	-99	2	7	When I am feeling nostalgic about the past, or about a person from my past, I may listen to sad music which relates to that time/person.	2	1	1	1	1	0	0	0	0	0	0	0	7	7	5	4	1	1	1	1	1	1	1	7	7	7	4	1	1	4	0	0	4	1	2.5	7	4	7
29	2	US	US	4	1	Differnt kinds	-99	2	3	None	2	3	1	1	1	1	0	0	0	0	0	0	4	4	4	4	4	4	4	4	4	4	4	4	4	4	4	4	4	14	14	14	14	4	4	4	4	4
47	2	Spain	Spain	4	2	Whatever: traditional spanish folk, pop, classic, indie...	Voice	2	3	Actually I can't remember	3	3	1	0	1	0	0	0	0	0	0	0	5	2	4	4	4	5	6	6	6	6	5	6	6	6	6	5	6	12	18	19	9	2	5	5.5	6	5.5
20	2	US	US	3	1	Alternative, Acoustic, Pop	Piano	4	7	I have a playlist on iTunes called Sad Songs that I play after a breakup or fight with my significant other, during a lonely night, or after an awful day.	6	4	1	1	0	0	1	0	0	0	0	0	4	7	5	6	7	7	7	6	6	7	7	7	4	4	4	7	4	11	20	24	9	1	7	6	5	6.5
21	2	Germany	Germany	3	1	Alternative, Metal, Rock, 70s, 60s, Singer/Songwriter, Indie, Folk, Hip Hop	Voice	4	7	depressive episodes being scared after breaking up/lovesickness	7	4	1	0	1	0	1	0	0	0	0	0	6	6	7	7	7	6	7	7	7	2	5	4	7	7	7	7	7	28	26	24	14	2	6.5	7	4	7
33	1	UK	UK	2	1	Rock, classical	Piano	6	6	Wanting to trigger tears to grieve	4	5	0	1	1	0	1	0	0	1	0	0	-77	-77	-77	-77	-77	-77	-77	4	5	6	3	5	5	5	3	3	6	13	20	23	16	3.5	6.5	4.5	6	6
32	2	UK	Australia	1	1	acoustic rock, folk, classical, light jazz	voice	3	7	-99	5	5	1	1	1	0	1	0	1	1	0	0	2	7	5	5	6	7	7	7	7	4	7	7	7	7	7	6	6	22	19	24	7	7	4.5	6	4	6.5
29	2	Greece	Greece	4	1	Greek rock ballads	-99	5	6	separation loneliness	7	4	0	1	1	0	1	0	0	1	0	0	-77	-77	-77	-77	-77	-77	-77	4	5	6	6	6	4	6	6	6	6	19	20	21	10	4	4	4.5	3.5	4
25	2	Ireland	France	2	1	Folk, indie folk, classical, world music, Irish music, jazz	harp	3	3	It is difficult to answer the question because of the definition I would give to sad music , which is still quite unclear to me. However I think some of the music I listen to when I am sad are not necessarily sad to me but maybe could be to the ears of	4	1	0	0	1	0	1	0	1	0	0	0	-77	-77	-77	-77	-77	-77	-77	7	7	7	7	7	7	7	7	7	7	21	14	24	10	4	4.5	6.5	2	7
26	2	UK	Canada	1	1	minimal/electronic/acoustic/folk	piano	4	7	break up/ death	7	1	0	1	0	0	1	0	0	1	0	0	-77	-77	-77	-77	-77	-77	-77	7	7	6	6	6	6	6	6	6	6	21	19	24	9	4.5	6.5	6.5	5	7
31	2	Brazil	Brazil	3	1	Samba, mpb, salsa, mbalax, jazz, classical rock, instrumental, hiphop, reggae	Brazilian tamborim	3	5	Mainly when I feel loneliness or upset.	3	5	0	0	1	0	0	0	0	0	1	0	-77	-77	-77	-77	-77	-77	-77	5	2	3	2	6	2	2	6	5	5	18	22	19	13	7	5	5	3.5	7
18	1	US	US	3	1	Christian Metal/Rock	Xylophone	4	5	When I'm having a really bad day, such as everything seems to be going wrong, I tend to avoid upbeat music and listen to only sad songs	7	5	0	0	1	0	1	0	0	0	0	0	-77	-77	-77	-77	-77	-77	-77	7	5	3	4	5	6	6	6	6	7	25	18	17	14	4.5	3.5	6	5.5	7
48	1	UK	US	3	2	postpunk, alternative, progressive, & pop rock; some classical,jazz,darkambient	percussion	1	1	i do not seek out music when I am sad. i am much more likely to seek out music when i am happy or when I am seeking distraction	1	5	0	0	1	0	1	0	1	1	0	0	-77	-77	-77	-77	-77	-77	-77	1	5	6	5	5	7	7	3	4	5	24	18	21	17	4	4	5.5	3.5	4.5
23	2	Germany	Germany	2	1	classic,pop,rock, baroc	piano	5	6	when I feel lonely when grieving when trying to relax	4	5	1	1	1	1	0	0	0	0	0	0	6	6	7	7	6	6	5	3	4	2	5	6	5	6	5	6	5	19	22	21	14	4	5.5	6	4	6
24	2	Germany	Germany	3	1	metall, rock, nearly all kind	piano, recorder	5	3	-99	5	6	0	0	1	0	1	0	0	0	0	0	-77	-77	-77	-77	-77	-77	-77	4	4	3	2	2	2	2	2	2	3	9	13	15	14	2.5	2.5	5	2.5	4.5
36	2	US	US	4	1	Country, Folk,	voice	6	4	I generally prefer sad music because it tends to be slower and I enjoying singing music that is sad because it has ore feeling.	7	6	1	1	1	0	1	0	1	1	0	0	7	7	5	5	6	5	5	4	7	7	5	5	6	5	5	5	3	20	19	27	10	7	7	5.5	6.5	6.5
20	1	US	US	4	2	Hip Hop	-99	4	1	-99	1	1	0	0	0	1	0	0	0	1	0	0	-77	-77	-77	-77	-77	-77	-77	1	1	1	6	1	1	1	1	1	3	8	17	11	8	1	3	7	7	5
23	2	Ireland	Ireland	1	1	Classical Music	Piano	4	6	My grandmother passed away recently, and although the music I chose to listen to didn't contain lyrics specific to loss or grief, it was still sad music, and probably reflected the way I felt. I usually listen to sad music when I'm driving home	5	5	0	0	1	0	1	0	0	1	0	0	-77	-77	-77	-77	-77	-77	-77	7	5	5	5	6	5	5	4	7	3	26	19	26	6	6	6.5	7	4	6.5
48	2	Australia	Australia	4	1	dance/pop	singing	2	7	usually I don't as sad music can make my sadness/depression even worse, however, sometimes sad music can remind me that I am not alone with these types of feelings, as songs are wrtten with public listeners in mind, knowing that lyrics in sad songs can b	2	2	1	1	1	1	0	0	0	0	0	0	7	7	7	7	6	6	5	2	5	5	6	7	7	7	7	6	6	25	24	21	9	2	6.5	7	1.5	5.5
34	1	UK	UK	3	1	Rock, heavy metal, punk, classical, folk, electronica	guitar, voice, double bass	5	5	After a break-up with a girlfriend, after a difficult day at work (or looking for work), to celebrate aloneness such as in a wide landscape, feeling down for no reason.	7	5	1	1	1	0	1	0	1	1	0	0	6	5	6	7	7	7	5	7	6	5	7	7	6	6	3	5	5	19	18	24	12	1.5	6	5.5	5	7
27	2	Ireland	Ireland	1	1	Indie	Cello, Trumpet, Piano, Guitar.	5	2	I generally wouldn't consider myself to be sad when I listen to 'sad music'..I choose that style of music mainly to unwind/relax.	3	5	0	0	0	0	1	0	0	1	0	0	-77	-77	-77	-77	-77	-77	-77	3	6	4	4	6	6	7	7	5	5	12	27	26	3	4	5.5	5	6	5.5
46	2	US	US	4	1	Country	-99	1	1	NA I do not seek out sad music	1	2	1	0	0	0	0	0	0	0	0	0	7	7	6	2	5	1	7	2	2	1	2	2	2	2	2	3	6	13	18	19	16	4	4.5	5	3.5	5.5
21	1	Singapore	Singapore	3	1	Classical, jazz, musicals, pop	piano	6	6	Mostly when I'm alone and feeling lonely.	7	6	1	1	1	0	0	0	1	1	0	0	6	6	7	6	6	5	7	7	7	6	5	6	3	3	3	5	5	21	19	20	17	2.5	6	5	4	5.5
25	2	US	US	4	1	standards (mostly Frank Sinatra); movie soundtracks	voice	5	7	doing badly on a test, feeling betrayed by someone close, worrying about work/school	7	4	1	0	0	1	0	0	0	1	0	0	5	7	7	7	1	7	7	7	7	7	7	3	1	1	1	1	5	18	9	15	11	4.5	1.5	6	1	4
26	2	Ireland	China	1	1	new age	piano	7	2	recall the past	2	6	0	0	0	0	1	0	0	0	0	0	-77	-77	-77	-77	-77	-77	-77	4	5	7	6	4	5	4	4	3	6	12	22	14	15	4	4	4	4	4
20	2	US	US	2	1	Christian Contemporary, Classical	Voice, also play harp and piano	5	7	When I am upset or feeling contemplative	4	5	1	1	1	0	1	0	0	0	0	0	7	7	6	6	7	7	6	6	7	3	6	6	7	7	7	5	6	18	25	24	16	5	6	6	2	6
40	2	United Arab Emirates	London and Jordan	4	1	Alternative, rock, guitar based	-99	5	6	Feeling nostalgic or melancholic. Feeling lonely or misunderstood Feeling introverted and withdrawn	6	5	1	1	1	0	0	0	1	1	0	0	4	7	7	6	7	7	7	5	3	3	7	5	5	5	4	6	4	25	14	25	19	5	4.5	4	2.5	7
28	1	UK	Italy	3	1	Electronic, Jazz	Clarinet	3	5	Hot Bath	5	5	0	1	1	0	0	0	0	0	0	0	-77	-77	-77	-77	-77	-77	-77	5	5	5	4	3	5	5	4	5	5	14	16	18	9	4.5	3	4.5	2.5	6
21	2	US	US	4	2	Indie Rock, Pop	-99	4	7	When people die, when I'm lonely, when I've had a bad day	7	2	1	0	1	0	1	0	0	0	0	0	6	6	5	6	7	7	7	7	7	7	7	7	7	7	7	7	7	27	19	28	16	4.5	4.5	3.5	3.5	4.5
23	2	US	US	4	1	Folk	-99	6	7	Having a bad day, going through a difficult experience, feeling sick	7	4	1	0	1	0	1	0	0	0	0	0	3	6	7	5	4	5	5	7	7	3	6	3	4	2	3	2	2	22	22	18	14	6.5	6	6.5	4.5	5.5
28	1	Norway	Norway	2	1	Jazz, EBM, Goa	Synth	3	7	If I am depressed, angry or feel sorrow I would seek out music which harmonize with my state of mind.	7	3	0	0	1	0	1	0	1	0	0	0	-77	-77	-77	-77	-77	-77	-77	7	7	1	7	3	3	3	3	5	6	18	12	12	28	2	2	4.5	2	4.5
53	1	US	US	4	1	folk, classical, rock, bluegrass, opera	-99	3	5	i just like a specific song	5	3	1	0	1	0	0	0	0	0	0	0	5	5	5	3	7	3	4	3	5	6	6	1	6	4	4	4	5	21	15	27	5	5	4	4	4.5	5
30	2	Ireland	Ireland	3	1	bit of everything apart from opera and metal stuff	bodhran..dont sing	3	3	loneliness, griefing	2	2	1	1	0	0	0	0	0	1	1	0	5	5	1	6	6	7	6	6	5	5	4	6	5	7	5	6	5	16	17	21	14	4	5.5	5.5	2.5	5
19	2	US	US	3	1	hip hop	-99	5	7	When I'm fighting with a friend	6	4	1	0	0	0	1	0	0	0	0	0	6	6	3	5	2	5	5	2	2	4	5	5	3	5	3	4	3	14	10	18	15	6	4	5	3.5	4.5
21	2	US	US	4	1	pop, country, rap,	-99	4	7	after a break up, after someone passes away, lonely.	6	5	1	1	1	0	1	0	1	0	0	0	6	7	6	4	5	6	6	3	3	5	5	6	4	4	4	6	6	19	21	23	19	2	4.5	5.5	3	2
21	2	US	US	3	1	Alternative Rock	Piano	5	7	I tend to seek out sad music when I'm in a reminiscing mood or when I'm particularly lonely.	7	5	0	1	1	0	1	0	0	0	0	0	-77	-77	-77	-77	-77	-77	-77	6	7	7	7	5	5	5	4	4	6	19	24	27	14	1.5	7	6.5	3	6
30	2	Spain	Spain	4	1	Rock, pop-rock, indie, folk, classical	-99	4	7	When I am stressed after work. When I am sad for whichever reason and there is a song I know already, whose lyrics fit my feelings and the situation perfectly.	6	4	1	1	1	0	1	0	1	0	0	0	2	6	5	3	2	7	7	7	7	2	2	6	2	2	2	5	2	21	23	22	10	3.5	4.5	6.5	6.5	6.5
29	2	US	US	4	1	pop	-99	4	3	-99	3	5	0	1	0	0	1	0	0	0	0	0	-77	-77	-77	-77	-77	-77	-77	4	5	5	4	4	6	6	6	6	5	24	20	24	13	5	5	5	5	5
33	2	US	US	3	1	pop, rock, alternative	trumpet	3	5	I listen to them if I am already sad. I will listen to them if they come on the radio because I enjoy them.	4	3	1	1	1	0	0	0	0	0	0	0	6	7	7	6	6	7	7	3	3	3	5	5	6	5	5	5	3	28	25	21	10	7	6	4	4	5
37	2	Uruguay	Uruguay	3	1	Classical mainly, pop and rock sometimes	piano, voice	1	1	I avoid sad music, just as I avoid any sad thing. However, I feel attracted to some sad music which seems deeply emotional to me	1	2	1	1	1	0	0	0	1	1	0	0	4	5	5	5	7	1	1	1	1	1	1	2	2	3	4	1	4	22	24	27	11	6	4.5	6	4.5	7
19	2	US	US	4	1	Country	Voice	4	7	Stressed about family life Did bad in school	6	4	1	0	1	0	1	0	0	0	0	1	4	5	6	5	5	6	5	7	7	3	6	4	1	1	5	6	5	13	12	15	18	3.5	4.5	6	2.5	3.5
19	1	US	US	3	1	Rap, gospel, dubstep, jazz, classical, r&b	Saxophone	2	4	Rarely, if ever. once during a break up	3	2	0	0	1	0	0	0	0	0	0	0	-77	-77	-77	-77	-77	-77	-77	5	5	5	1	7	7	7	7	2	6	12	23	22	2	3	5	5.5	5.5	7
60	2	Germany	Germany	4	2	Klassik, Soul, Blues, Jazz	Singen	4	4	Gutes Alleinsein, in der Natur-Sein, eigene intensive Stimmungen	4	6	0	1	1	0	1	0	1	1	0	0	-77	-77	-77	-77	-77	-77	-77	3	3	3	2	2	3	3	3	3	3	14	17	13	12	3.5	5.5	7	6.5	6
27	2	UK	US	1	1	classical	violin	6	4	-99	2	6	1	1	1	0	1	0	1	1	0	0	4	5	5	5	6	3	6	4	6	6	5	6	6	6	5	5	6	18	18	23	15	4	6	6.5	5	6
32	1	France	France	2	1	Instrumental hip hop, beats	Sampler	5	2	Finishing a long distance run	2	6	0	1	0	0	1	0	0	1	1	0	-77	-77	-77	-77	-77	-77	-77	2	5	4	6	5	6	6	6	6	4	21	15	16	9	3	4.5	6.5	4	6.5
25	1	Slovakia	Slovakia	4	2	Everything - from pop, hous, techno to R.A.P. classical, electronic and oldies.	-99	4	6	-99	5	4	0	0	1	0	0	0	1	0	0	0	-77	-77	-77	-77	-77	-77	-77	5	5	4	5	5	5	4	5	4	5	16	25	21	14	6	5.5	5	6.5	4.5
28	2	Germany	Turkey	4	1	jazz, electroclash, trip-hop, soul	-99	5	5	while learning	6	6	0	0	1	0	1	1	0	0	0	0	-77	-77	-77	-77	-77	-77	-77	2	6	6	6	6	2	2	6	3	3	14	11	17	12	2	2.5	6.5	2	3.5
23	2	Germany	Germany	2	1	classical, Liedermacher, indie, rock	singing (soprano)	2	6	-99	1	2	0	0	1	0	0	0	0	0	0	1	-77	-77	-77	-77	-77	-77	-77	2	2	3	3	3	2	2	2	5	2	21	19	20	10	6	5	5	6	7
28	2	UK	Italy	4	2	Folk	Piano	5	7	If I had a bad day, if I'm driving a car, If I had an argument with someone	5	6	0	0	0	0	1	0	0	1	1	0	-77	-77	-77	-77	-77	-77	-77	5	6	6	4	5	3	3	3	1	4	19	12	20	6	3.5	4.5	4	3	5.5
33	2	UK	UK	4	1	Folk, Post punk, Krautrock, Techno, Dubstep	-99	4	5	When feeling reflective, when on my period and I need a good cry	5	5	0	1	1	0	1	0	0	1	0	0	-77	-77	-77	-77	-77	-77	-77	6	7	6	6	6	7	7	7	7	7	24	14	21	7	4	4	5	5.5	6
30	2	UK	Poland	2	2	pop	oboe	4	5	Feeling down, lonely	4	4	0	1	1	0	1	0	0	0	0	0	-77	-77	-77	-77	-77	-77	-77	5	6	6	6	5	6	6	6	5	6	17	15	18	14	4.5	4	4	3.5	4.5
23	2	Germany	Germany	3	1	pop, rock, soul	flute	4	5	when I am sad or disappointed, want to relax	6	3	0	1	1	0	1	0	0	0	0	0	-77	-77	-77	-77	-77	-77	-77	6	7	7	6	5	4	3	3	6	5	17	22	20	10	4.5	6	6.5	7	5.5
33	1	Greece	Greece	3	1	rock, pop rock, alternative rock	electric guitar	5	6	-99	6	4	0	1	1	0	0	0	1	1	0	0	-77	-77	-77	-77	-77	-77	-77	4	6	6	5	6	5	5	5	5	5	11	22	25	4	3.5	4	2	6.5	6
19	2	US	Korea	4	2	Hillsong	Flute	6	2	when I feel sad	7	5	1	1	0	0	1	0	0	0	0	0	2	6	5	6	2	7	5	4	6	4	4	6	4	5	5	4	5	14	17	10	15	4	5.5	4	3	4
32	1	Finland	Spain	4	2	-99	voice	6	3	I like sad music for no specific reason. It is just nicer :)	5	6	0	0	0	0	1	0	1	1	0	0	-77	-77	-77	-77	-77	-77	-77	6	6	6	6	6	3	3	6	2	2	15	25	13	6	5.5	2	6	6	6.5
20	2	Pakistan	Pakistan	2	1	-99	guitar	5	6	no	5	6	1	0	0	0	0	0	0	0	0	0	3	4	2	5	3	1	2	2	2	2	2	3	3	2	3	1	1	9	13	12	13	4	4	4	4	4
33	2	Spain	Spain	4	1	Rock, Indie, Pop, Dance	Voice	2	7	While working at the computer if I need to be focused. If I feel happy and want to enjoy a quiet moment.	1	3	0	1	0	0	0	0	0	0	0	0	-77	-77	-77	-77	-77	-77	-77	1	1	1	1	1	2	2	2	1	1	18	17	25	7	6	3	6.5	6	6.5
27	2	UK	Greece	4	1	Rock, post punk	keyborads	5	2	Thinking about the past, wanting to think, travelling, reading, dance	4	6	0	1	1	0	0	1	1	1	0	0	-77	-77	-77	-77	-77	-77	-77	4	4	6	7	6	6	6	6	4	7	23	16	22	21	4	3.5	2.5	2	5.5
23	2	US	US	3	1	Post-rock, shoegaze, ambient, electronic	Piano	5	6	Loneliness, separation/isolation from the world	6	6	1	0	1	0	1	0	0	1	1	0	6	6	5	7	2	6	4	5	6	4	7	5	6	6	5	2	2	4	20	14	22	3	3.5	3.5	3	5
18	2	US	US	3	2	Country, Christian Inspirational, Soft Rock	piano	4	5	If I'm having a quiet or off day, or I need to calm/ relax my mind.	5	4	1	1	1	0	1	0	1	1	0	0	6	6	5	5	5	6	6	3	4	6	5	4	4	5	3	3	5	22	14	24	13	3	6	6.5	3.5	6
18	2	US	US	4	1	Alternative Rock, Punk Rock, Punk Pop	Voice	4	6	I have a go-to album that I listen to in my car when I am angry. It's really loud and heavy music which allows me really get out all of my anger without casting it on anyone else around me.	6	4	1	1	1	0	1	0	0	1	0	0	5	6	5	7	6	2	5	6	7	6	6	6	5	6	4	7	5	21	13	16	17	3	4.5	6	5	6.5
34	1	Germany	Israel	2	1	progressive rock/metal/electronics, idm, fusion, classical, trip hop, and more	bass guitar	3	6	feeling lonely, hurt, depressed, frustrated.	6	4	1	1	1	0	1	0	1	0	0	0	6	7	7	7	7	4	7	7	7	7	7	7	7	7	7	7	7	27	26	25	12	6	6.5	6	6	7
37	2	Finland	Spain	4	2	Pop, classic, rock, blues, celtic	-99	2	5	Thinking about the past or certain people	3	3	1	0	1	0	0	0	0	0	0	0	5	6	5	4	5	4	5	4	4	3	4	3	4	4	4	3	3	22	15	19	11	3	5	3.5	3.5	4.5
26	2	Germany	Germany	4	2	Alternative Rock	piano	3	5	Mostly after stressful days when I want to calm down, in the subway or at home. Sometimes also because I feel sadly, because I am worried about something or had a fight.	5	2	0	0	1	0	1	0	0	0	0	0	-77	-77	-77	-77	-77	-77	-77	6	5	4	5	4	4	4	4	6	4	17	26	22	9	5	4.5	7	4.5	5
28	2	France	Italy	4	2	indie rock	-99	5	5	Moments of loneliness and melancholy or when I just wish to let ideas flow.	4	5	0	0	1	0	1	0	0	0	0	0	-77	-77	-77	-77	-77	-77	-77	2	5	7	3	3	4	6	4	1	2	19	23	22	11	2.5	5.5	5	5	6
35	1	Germany	Germany	3	1	Pop, Rock, (from Heavy Metal to Raggae, Rap) no classic	in this order: voice, guitar, cello, violin	2	3	lovesickness	3	5	0	0	1	0	1	0	0	0	0	0	-77	-77	-77	-77	-77	-77	-77	6	5	3	2	5	3	5	2	5	6	17	14	16	12	5.5	4	5	4.5	6
28	2	UK	Poland	4	1	All musical genres. No boundaries in music ;-)	-99	3	3	When I'm so sad that I need something to help me cry When a certain song reminds me of some great moments from the past (usually linked to love and friendships) But most often I listen to sad music simply because I find certain sad music good	2	4	1	1	1	1	0	0	0	0	0	0	5	6	6	5	6	7	7	2	4	6	5	6	6	6	4	5	5	27	15	21	19	5.5	4.5	4.5	2	6.5
29	2	US	US	3	1	classic rock, pop, country, opera, musical theater, alternative	voice	4	6	break ups, work issues, funerals	7	5	0	0	1	0	0	0	1	1	0	0	-77	-77	-77	-77	-77	-77	-77	2	6	6	6	7	5	6	6	4	5	28	22	17	4	6	4.5	6	5	4.5
47	1	Japan	US	3	1	Rock, dance, R&B, jazz, electronic, classical	Guitar	5	6	When I'm feeling depressed and hopeless. After having sex with someone I don't really love. When I feel overwhelmed by life.	6	4	1	0	0	0	1	0	0	1	1	0	6	7	5	5	7	6	4	6	5	5	7	5	4	4	4	7	7	22	19	20	16	2	4.5	3.5	3	5.5
19	2	Germany	Germany	4	1	Indiependent Alternative Rock Pop	Guitar	3	6	I seek out sad music, if i am coping with the seperation of my boyfriend.	5	2	1	0	1	0	0	0	0	0	0	0	6	6	5	4	6	7	6	3	4	2	6	6	5	4	3	5	5	24	22	19	14	6	4.5	6	4	6.5
50	2	US	US	3	1	eclectic	piano	7	2	Remembering a deceased sister and brother	2	5	0	1	1	0	0	0	1	0	0	0	-77	-77	-77	-77	-77	-77	-77	4	5	4	4	4	4	4	4	4	5	14	21	23	5	5	6.5	7	6	6.5
16	2	US	US	2	1	indie, pop, acoustic, pop-rock	voice	3	6	arguement with someone, stressing out	6	2	0	1	1	0	1	0	1	1	0	0	-77	-77	-77	-77	-77	-77	-77	7	6	7	5	6	7	6	4	3	5	25	10	15	11	1.5	4	2.5	3.5	4.5
19	2	US	US	4	1	Country	-99	5	4	-99	4	2	1	1	0	0	0	0	0	0	0	0	6	5	5	4	4	2	3	3	3	4	6	3	5	4	4	3	3	11	14	15	13	5.5	6.5	5.5	4	4
20	2	US	US	4	1	Alternative, rock, techno/electronica, classical,	Used to play trombone for three years, so probably that.	4	7	After an argument, or when sketching a scene/person that has sadness in it.	7	4	1	1	1	0	1	0	1	1	0	0	7	7	7	7	5	5	7	7	3	3	7	7	7	7	5	5	3	20	19	12	8	1	5	5.5	4	6.5
18	2	US	US	4	1	pop, rock, alternative, punk, jazz, blues, symphonic	-99	5	3	When I am in a tearful mood, and alone, I listen to sad music and cry.	7	2	1	1	1	0	1	0	1	1	0	0	7	4	7	7	1	7	4	5	7	6	7	6	7	7	3	5	7	28	15	13	16	1.5	5	4.5	2	7
19	2	US	US	4	1	rock, rap,	-99	5	6	fight with boyfriend, death of family member	6	4	1	0	0	1	0	0	0	0	0	0	6	6	6	5	1	4	6	4	1	1	4	4	4	4	4	4	4	10	16	18	18	2.5	5	4.5	2	4.5
18	1	US	US	4	2	hip-pop pop rock	voice	4	6	bad break up	6	3	0	0	0	0	0	0	1	1	0	0	-77	-77	-77	-77	-77	-77	-77	6	5	3	5	5	6	3	3	4	5	16	15	13	15	4.5	4	4.5	4	4.5
24	2	UK	UK	3	1	country, classical, pop	flute	3	3	When i am remebering people from my past, or feeling nostalgic	2	5	0	1	1	0	1	0	1	1	0	0	-77	-77	-77	-77	-77	-77	-77	2	4	4	3	3	2	2	2	4	3	11	14	19	10	2	5.5	6	4	4.5
20	2	US	US	3	1	Country/Christian/Pop	Trumpet	2	7	Thinking about past relationships. Thinking about hard decisions.	4	1	1	1	0	0	1	0	1	0	0	0	6	7	3	5	2	5	2	6	5	4	5	5	5	6	5	6	2	16	15	18	15	6	3.5	5.5	5	5.5
18	2	US	Canada	3	1	pop, jazz, hip hop, blues, musicals and godspel	voice	5	7	break ups, fights , loneliness	7	2	1	0	1	0	1	0	1	1	0	0	7	7	6	6	5	2	4	3	5	6	7	6	4	5	2	7	6	16	21	17	18	4.5	3	7	4	6
27	2	Germany	Germany	4	1	New Metal, Progressive Metal, Posthardcore, Electronica, 80s Synthie Pop, Reggae	-99	3	5	Sometimes I just want to listen to sad music, because I think it's beautiful. I don't neccessarily have to be sad. Sometimes I listen to beautiful sad music while in a good mood.	5	4	1	1	1	0	1	1	0	0	1	0	4	7	5	7	6	7	5	6	6	3	2	2	6	5	1	7	6	25	21	26	20	6.5	6.5	3.5	2.5	7
25	2	Germany	Germany	4	2	Britpop, Rock, Alternative	saxophone	5	7	When I´m alone, when I´m bored, shortly before going to bed	6	3	1	1	1	0	1	0	0	0	1	0	7	7	5	5	2	7	4	3	6	6	6	5	4	4	4	4	5	23	14	14	11	6	4.5	6	6	4.5
28	2	US	US	4	1	Country	clarinet	3	7	After a funeral	3	5	1	1	0	0	0	0	1	0	0	0	6	7	7	6	6	6	7	5	6	6	5	4	5	7	4	4	6	24	18	24	11	5.5	5	6.5	4	4
17	2	US	US	4	1	country, rock, classic rock, pop, hip hop	flute	3	6	When I broke up with my ex-boyfriend, I always wanted to listen to sad music to comfort me	6	2	1	1	1	0	0	0	0	0	0	0	6	7	5	5	4	1	4	5	6	4	5	4	5	3	4	3	5	22	24	26	14	4.5	6	7	5.5	7
17	2	US	US	3	1	rock, pop, acoustic, spanish	Voice	4	5	-99	4	3	0	0	1	0	1	0	1	1	0	0	-77	-77	-77	-77	-77	-77	-77	4	6	2	5	5	4	4	4	4	4	17	18	20	11	5.5	5	6.5	6	6
32	2	UK	UK	3	1	Classical, folk, popular	Saxophone	5	5	When I've had a long and tiring day At night, with candles	5	6	1	1	1	0	1	0	1	1	0	0	3	7	7	6	6	6	7	6	7	7	6	5	3	3	3	1	4	19	20	19	8	6	4.5	5.5	6.5	6.5
18	2	US	US	4	1	Indie	guitar	4	7	When I feel the need to relate to someone after an argument with a friend.	5	3	1	1	1	0	1	0	0	0	0	0	5	7	7	7	7	4	7	7	7	7	7	7	7	7	7	7	5	21	25	26	12	2.5	6.5	4	7	6.5
32	2	Greece	Greece	4	1	Pop, rock	Piano	4	6	Loneliness, Disappointment, vanity, unfulfilled love	6	4	0	1	1	0	0	0	0	0	0	0	-77	-77	-77	-77	-77	-77	-77	4	5	7	6	5	7	7	6	7	5	24	17	22	8	6	3.5	6	4.5	5
18	2	US	US	3	1	Country, Broadway, Pop, R&B, Rock, Singer/Songwriter	Voice	4	7	After having a bad day, I usually listen to sad music for a little while.	6	2	1	1	1	0	0	0	0	0	0	0	6	7	7	7	7	6	7	2	3	4	7	7	7	7	7	7	7	28	20	25	16	3.5	5.5	5.5	4.5	6
18	1	Canada	Canada	3	1	Folk and alternative rock	Piano	5	6	sometimes when seeking inspiration for a piece of songwriting	5	4	1	1	1	0	0	0	1	1	0	0	5	7	2	6	5	6	5	5	6	7	7	6	5	6	5	4	3	19	13	16	19	2	5	5	3.5	4
20	1	US	US	4	1	Alternative	-99	4	3	break up	3	6	0	1	1	0	1	1	0	1	0	0	-77	-77	-77	-77	-77	-77	-77	4	6	6	6	5	6	6	6	7	7	18	17	17	17	3	4.5	7	3.5	5.5
22	2	US	US	4	1	r&b, classical	-99	3	4	when i'm tired, when im lonely	7	6	1	0	1	0	1	0	0	1	0	0	5	2	6	6	7	6	6	4	6	4	4	6	6	6	6	6	6	23	24	27	8	4.5	4.5	5.5	4	4
35	2	UK	Sweden	4	1	INDIE POP ALTERNATIVE FOLK ELECTRONIC HIP HOP WORLDWIDE	-99	4	1	-99	3	6	0	0	1	0	1	0	0	1	0	0	-77	-77	-77	-77	-77	-77	-77	6	6	5	5	5	5	5	5	5	5	22	17	24	11	4	5	4.5	3.5	6
30	2	Greece	Greece	4	1	alternative rock, darkwave, gothic	-99	4	6	being lonely, tired or being calm/relaxed under a gray rainy sky.	5	4	1	1	1	0	1	1	0	1	0	0	4	7	2	6	2	1	4	6	7	4	5	4	7	7	7	1	5	22	17	19	12	6	5.5	4	5.5	6
35	2	Greece	Greece	4	1	epic metal	piano	3	6	-99	7	2	1	0	1	0	1	0	0	0	0	0	2	6	7	5	5	3	6	6	7	5	5	3	4	5	3	5	4	25	25	19	14	3	3.5	5	2.5	4
30	2	Greece	Greece	1	1	Rock	Guitar	2	7	-99	7	1	1	0	1	0	0	0	0	0	0	0	4	7	4	5	1	7	6	1	2	3	3	5	1	1	1	7	4	19	17	24	22	1	5.5	6.5	4	5.5
35	2	Greece	Greece	3	1	rock	piano	3	5	-99	4	6	0	1	1	0	0	0	0	0	0	0	-77	-77	-77	-77	-77	-77	-77	5	3	6	6	6	4	4	4	3	3	18	19	21	9	5.5	5	7	5.5	7
21	2	Poland	Poland	3	1	rock'n'roll, rockabilly, classical music (violin concertos)	percussion	3	1	I do not choose to listen sad music, I just listen to all of the songs on my playlist.	1	7	0	0	0	0	1	0	0	0	0	0	-77	-77	-77	-77	-77	-77	-77	1	3	3	2	5	6	6	6	5	6	26	24	24	12	1.5	4.5	5.5	3.5	6
32	1	Greece	Greece	4	1	PUNK ROCK, CLASSICAL, MAINSTREAM, HIP HOP, JAZZ	-99	4	1	I DON'T SEEK OF SAD MUSIC BECAUSE OF A SPECIFIC SITUATION I HAVE DO DEAL WITH. I JUST ENJOY LISTEN TO SAD MUSIC, FOR NO REASON.	1	4	0	0	0	0	1	0	0	0	0	0	-77	-77	-77	-77	-77	-77	-77	1	1	1	1	1	1	1	1	1	1	20	23	25	8	3	5	3.5	2	5.5
32	2	UK	Italy	4	2	indi, pop, folk	-99	1	5	When I'm feeling down or I need to relax	3	5	0	0	1	0	1	0	0	1	0	0	-77	-77	-77	-77	-77	-77	-77	4	2	6	6	6	6	6	6	6	6	21	19	23	9	5	3.5	4.5	2	6.5
26	2	Germany	Italy	4	1	Rock, Pop, Blues,Jazz,Folk	-99	5	6	I used to listen to sad melancholic music in order to try to recover from a break up( as a sort of catharsis).	4	5	0	1	1	0	0	0	1	1	1	0	-77	-77	-77	-77	-77	-77	-77	6	7	7	7	6	5	5	5	7	7	20	18	19	17	2.5	6	2	2.5	7
34	2	Finland	Colombia	4	1	Rock/Pop/Salsa/Reggaeton/Classical/	Voice	5	7	Breakups/Homesickness	6	3	1	0	1	1	0	0	0	1	0	0	5	7	6	5	5	7	6	1	3	5	5	6	4	6	4	1	2	15	21	22	11	7	6.5	6	5	5.5
26	2	UK	Greece	4	1	dub, electronic, roots, triphop, experimental, soundscaping	-99	6	2	thinking, reading	2	6	0	1	1	0	1	1	1	1	0	0	-77	-77	-77	-77	-77	-77	-77	7	4	5	6	7	6	2	5	5	1	14	25	22	18	3.5	4.5	5.5	1	6
37	1	Greece	Greece	4	1	rock	-99	6	2	In order to read, or concentrate in something (eg work,)	6	6	0	1	0	0	1	0	1	0	1	0	-77	-77	-77	-77	-77	-77	-77	6	6	4	2	2	5	5	6	2	2	21	15	21	7	6.5	4	6.5	6	6
28	2	UK	UK	4	1	gypsy,balkan / rock / indie / pop	-99	4	3	recently i moved away from my friends and family for a few months, in the first week I definitely felt a bit isolated and lonely and would listen to music that reflected this.	4	3	0	0	1	0	0	0	0	0	0	0	-77	-77	-77	-77	-77	-77	-77	5	6	4	5	6	5	5	4	3	3	22	21	25	18	3.5	6	6.5	6	6
29	2	Brazil	Brazil	4	2	MPB	-99	5	3	When I´m melancholic	5	5	0	1	1	0	0	0	0	1	0	0	-77	-77	-77	-77	-77	-77	-77	4	5	4	2	1	4	4	5	5	6	21	20	15	8	1.5	4.5	3	6	5
20	2	US	Korea	4	2	Pop	clarinet	7	7	When I miss someone and I need to comfort myself	7	2	0	0	1	0	0	0	0	0	0	0	-77	-77	-77	-77	-77	-77	-77	6	6	3	6	7	4	3	5	6	7	16	21	15	21	2	6.5	5	3	6
27	2	UK	Greece	4	1	Indie pop rock, alternative rock, jazz, blues, swing	-99	5	3	When melancholic, when hungover, when non-reciprocally in love, when the sad music is good music as well	4	5	1	0	1	0	1	0	0	0	0	0	4	6	2	6	2	7	4	5	6	4	4	1	1	1	1	2	6	17	16	18	8	6	6.5	6	3	3.5
27	2	Greece	Greece	4	2	Jazz, Pop, Rock	-99	5	6	When i think about lovers of the past, when i think of my past in general	5	5	1	1	1	0	1	0	0	1	0	0	5	7	7	6	6	6	4	3	5	6	7	7	6	6	5	5	6	27	18	24	14	6	4	4	1.5	6.5
25	1	Spain	Greece	4	2	trip hop, hip hop, post rock, ambient, electro-ambient	-99	3	2	When i feel tired and i want to relax, i just want to listen beautiful tracks that some others may describe them as sad songs. I like the artistic result of this songs.	4	3	0	0	1	0	1	0	0	1	0	0	-77	-77	-77	-77	-77	-77	-77	4	5	5	5	6	4	5	4	5	5	15	13	19	12	3	3.5	6	3.5	5.5
30	2	Germany	Greece	1	2	songs, ethnic, classical, contemporary, children's songs, folk	violin	6	7	break up, fight with friends, waking up felling depressed, bad weather	6	4	0	1	1	0	1	1	0	1	1	0	-77	-77	-77	-77	-77	-77	-77	3	6	6	7	3	7	7	7	7	7	26	16	22	8	6.5	3.5	5.5	4	7
22	1	Greece	Greece	3	1	Deep & Soulful House, Techno, Disco, Funk, Hip-Hop, Jazz, Classical	Saxophone	3	6	-99	5	3	1	0	1	1	1	0	0	1	0	0	5	7	2	2	1	4	6	5	5	5	4	4	6	5	3	2	2	20	15	15	7	5	4	6	5.5	5
27	2	Netherlands	Greece	4	1	alternative rock/ indie	-99	3	4	feeling depressed and disappointed	2	5	1	0	1	0	0	0	0	0	0	0	3	6	3	6	3	6	6	1	3	4	5	4	4	5	4	3	6	8	16	17	9	2.5	6	5.5	4.5	3
22	1	US	US	3	1	Metalcore, Hardcore, pop-punk	Guitar	4	6	Tired, alone, restless, angry, hurt	5	4	0	1	0	0	1	0	1	1	1	0	-77	-77	-77	-77	-77	-77	-77	6	7	6	6	7	7	7	7	6	5	27	24	26	17	6.5	6	6	5	6.5
19	2	US	US	4	1	rock/alternative	piano	3	3	car rides and lonely moments	4	5	0	0	1	0	1	1	1	1	0	0	-77	-77	-77	-77	-77	-77	-77	5	5	5	3	4	5	5	5	5	5	15	18	20	10	6	5.5	5.5	6	7
23	2	US	US	3	1	classical, classic rock, folk, jazz	oboe	1	7	I do like blues, and will listen to blues when I am feeling tired, stressed and anxious, but those blues songs are part of a larger collection of very modal sounding music that I tend to seek out in those situations to relax	1	1	0	0	0	1	0	0	0	0	0	0	-77	-77	-77	-77	-77	-77	-77	1	1	1	1	1	1	1	1	1	1	26	23	20	14	2.5	4.5	5	3	7
25	2	UK	Greece	3	2	HOUSE MUSEC	PIANO	6	7	Being away from my friends and family. Getting low grades. Having a fight with my boyfriend.	7	4	0	0	1	0	1	0	0	1	0	0	-77	-77	-77	-77	-77	-77	-77	6	7	2	6	6	4	4	4	7	6	26	17	23	3	3	4	6	3	5
21	2	Singapore	Singapore	3	1	Rock	Piano	4	3	When I have the urge to cry but I cannot cry, I listen to sad music to make myself cry and feel better.	3	5	0	0	0	0	0	0	1	0	0	1	-77	-77	-77	-77	-77	-77	-77	4	4	6	6	6	4	4	4	5	5	18	15	24	17	3.5	5.5	4.5	4	3.5
19	1	US	US	3	1	Heavy Metal	Guitar	3	5	Breaking up with a significant other always yields sad music.	4	2	0	1	1	0	0	0	0	0	0	0	-77	-77	-77	-77	-77	-77	-77	3	3	6	6	6	5	5	6	1	1	5	17	14	5	7	4.5	6	6	7
19	1	US	US	3	1	Rock, Indie, Alternative, Rap, Dubstep	Violin/Guitar	5	6	Missing Someone due to death or travel.	6	2	1	0	1	0	1	0	0	0	0	0	5	7	2	6	6	5	6	6	6	4	6	6	4	3	2	4	5	22	21	18	8	5	4.5	6	7	6
19	1	US	US	4	2	Rock, Alternative, Indie	-99	3	7	A family member dying. A very bad break up.	6	3	1	1	1	0	0	0	0	0	1	0	6	7	6	5	4	6	7	6	5	4	5	5	5	6	5	3	4	18	10	18	13	2.5	4.5	4	7	3.5
20	2	Germany	Bulgaria	3	1	Rock	guitar/piano	4	5	when i`m alone, when i`m tired, sometimes when i`m nervous	6	4	0	1	1	0	1	0	0	1	0	0	-77	-77	-77	-77	-77	-77	-77	6	4	3	6	6	4	2	3	7	1	23	13	16	13	3.5	4.5	4	6.5	6.5
29	1	Germany	Greece	4	2	Alternative, rock, electronica	-99	3	5	When I am tired.	4	5	0	1	1	0	1	0	0	0	0	0	-77	-77	-77	-77	-77	-77	-77	2	2	5	2	3	2	2	2	5	5	9	12	17	9	3.5	5.5	5	5.5	5
38	1	Japan	Japan	4	2	Japanese pop(Western music)	-99	3	6	Feeling lonely	5	3	1	0	1	0	0	0	0	0	0	0	3	3	3	6	5	5	5	5	6	2	2	4	2	2	2	2	5	14	15	13	13	2	4	5	5	3
27	1	Japan	Japan	3	1	Classical, Pops (Japanese/British)	Piano	3	2	When I get a bit tired of performing happy or positive pieces (e.g., preparation for live concerts). When I would like to be emotionally moved/touched.	2	3	1	1	1	0	1	0	0	1	0	0	2	2	5	5	6	4	7	6	7	3	2	5	3	2	2	5	1	15	16	17	15	5	3.5	3.5	5.5	6
36	2	Japan	Japan	4	2	Western music	Piano	4	3	feeling lonely, need consolation from the music	2	5	0	1	0	0	0	0	0	0	0	0	-77	-77	-77	-77	-77	-77	-77	6	6	5	6	5	3	6	6	1	3	24	21	18	20	7	2.5	2.5	4.5	4.5
19	1	UK	Taiwan	2	1	funk, instrumental, electric, acid jazz	bass	3	6	NO	6	4	0	0	0	0	0	0	0	0	0	1	-77	-77	-77	-77	-77	-77	-77	3	1	2	3	4	6	4	4	2	1	16	10	18	19	2.5	4	4.5	2.5	6
31	2	UK	Japan	4	1	electronic music( techno, house )	Djing and play the electronic bass guitar	3	2	thinking about my past which was quite sad moment.	3	1	1	0	1	1	0	0	0	0	0	0	6	7	5	4	2	5	7	3	4	3	6	4	2	2	2	2	2	11	18	17	16	5.5	3.5	7	3	5
25	2	UK	Taiwan	4	1	electronic,indie	classical piano	4	5	when i miss someone or miss some moment	3	2	0	1	1	0	0	0	1	1	1	0	-77	-77	-77	-77	-77	-77	-77	2	1	1	2	2	2	2	2	2	2	15	16	16	15	3	6	5.5	4.5	6
25	2	Taiwan	Taiwan	4	1	pop	piano	4	6	bad break up	7	2	1	0	0	1	0	0	0	0	0	0	7	7	6	6	6	7	7	1	5	6	4	6	6	7	7	7	5	24	14	24	20	6	5	3	2	5
25	2	UK	Taiwan	2	1	rock/electronic/dance/classical/hiphop	turntable	2	6	having a big fight with my lover.	4	4	1	0	1	0	0	0	0	0	0	1	4	7	7	7	7	3	7	6	7	1	5	4	3	3	3	4	3	16	20	23	17	5.5	4.5	3.5	3.5	5
29	1	UK	Greece	4	2	rock	-99	4	4	when chilling at home alone after rejection in general	4	4	0	0	1	0	0	0	0	0	0	0	-77	-77	-77	-77	-77	-77	-77	5	4	4	6	6	5	6	6	5	4	12	15	13	9	4.5	3.5	6	5.5	4
29	1	UK	Greece	3	1	Punk Rock	Piano	4	5	Depressed, lonely, break-ups	6	3	1	1	1	0	1	0	0	1	0	0	6	6	5	7	5	7	5	1	5	4	4	5	5	5	4	7	4	19	23	21	12	4.5	4.5	6	1.5	7
34	1	Japan	Japan	4	1	house	piano	2	2	Actually I had a sad situation. I wanted to listen a sad music preferred. Situation is like a pass-away my closing people, like family and friends	5	1	0	0	1	0	1	0	0	0	0	0	-77	-77	-77	-77	-77	-77	-77	6	5	5	5	5	6	6	5	7	3	10	13	13	17	3	5.5	5	4.5	5.5
30	1	UK	Taiwan	4	1	Jazz	-99	7	3	-99	6	2	1	0	1	0	0	0	1	0	0	0	7	7	6	7	7	6	6	7	6	6	6	7	5	5	5	5	6	23	17	18	14	5.5	6	4.5	5.5	5
30	1	Vietnam	Taiwan	3	1	indie,post rock,electronic	-99	7	6	whenever i feel i live alone and will die alone.	7	5	1	0	1	0	1	0	0	0	0	0	6	7	5	5	6	6	7	4	6	6	7	4	6	5	4	2	7	16	17	10	13	4	3	5	5	5
29	1	Italy	Italy	3	2	pop	saxophone	5	7	when I'am relaxed or happy	2	5	0	1	1	0	0	0	0	0	0	0	-77	-77	-77	-77	-77	-77	-77	3	4	6	6	5	5	5	6	6	6	24	22	21	9	3.5	5.5	5	6.5	6
27	1	Japan	Japan	4	2	J-pops	voice	3	6	When I went to home alone, after drunk, midnight	6	2	1	0	1	0	0	0	0	0	1	0	5	7	6	3	5	6	5	5	5	2	5	3	2	2	2	6	5	11	17	15	14	3	4	5	3	4
28	2	Germany	China	3	1	Pop, classic	Piano	6	4	missing somebody, homesick, very clam	7	6	1	1	1	0	1	0	1	1	0	0	6	6	5	5	5	6	6	6	5	6	6	6	6	6	6	4	5	21	23	23	18	3.5	6.5	6.5	3	6
28	1	China	China	4	2	Popular Music	-99	5	4	when i am exciting, i want to listen to sad musik.	4	6	0	0	0	0	1	1	1	0	1	0	-77	-77	-77	-77	-77	-77	-77	3	6	5	4	6	5	6	4	5	4	13	19	17	12	3.5	4	5.5	3.5	5.5
27	2	US	US	4	2	Rock. Pop	Vocals	5	6	Loneliness or thoughts of loss lead to searching for music with depressive lyrics or undertones.	6	4	1	0	1	0	0	0	0	0	0	0	4	5	6	6	7	6	5	5	5	6	6	7	5	5	5	4	7	20	16	21	15	2	5.5	4.5	3	4.5
34	2	Germany	Korea	2	1	electro, jazz, western classical	piano	4	6	for feeling my sadness together with music(kinda sharing mood, feeling empathy)	5	5	1	1	1	0	0	0	1	1	0	0	6	7	6	5	6	4	3	6	7	6	6	7	5	4	5	5	6	18	19	16	15	4	6.5	5	2.5	4.5
31	1	France	Korea	4	2	Rock	Vocal	3	3	Rainy day, and after seeing emotional movie	6	5	0	1	0	0	1	0	1	1	0	0	-77	-77	-77	-77	-77	-77	-77	6	7	7	5	3	1	1	1	6	5	22	26	15	6	4.5	3	6	3	4.5
36	2	Germany	Korea	4	1	acid, classic	-99	3	7	feel alone. or think about past, when i feel alone	5	2	0	1	1	0	1	0	0	1	0	0	-77	-77	-77	-77	-77	-77	-77	2	5	6	5	5	4	4	4	7	6	25	21	19	12	4.5	6	2	3.5	7
31	2	Italy	Italy	3	1	Indie rock, grunge, pop, rock, classical	Piano	4	6	1) being in love and he/she doesn't love me back 2) having a bad day 3) feeling sad because of the events/weather/etc	6	3	1	1	1	0	1	0	0	0	0	0	3	7	5	6	4	6	6	7	7	6	6	6	7	6	7	6	6	22	18	16	11	3.5	6	5	3	7
35	2	US	Korea	4	2	pop, jazz	-99	4	4	-99	2	5	1	0	1	0	0	0	0	0	0	0	6	6	2	6	5	5	5	5	3	5	5	5	4	4	4	5	5	14	14	17	13	3	4	4.5	4.5	4.5
35	2	Canada	Korea	2	2	Pop	Piano	3	2	Weather (e.g. rainy, snowy day = sad/calm music)	3	2	1	1	1	0	1	0	0	1	0	0	3	3	5	3	3	5	3	2	3	6	3	5	6	5	5	3	3	22	15	19	10	3	5.5	5.5	5.5	5.5
38	2	Germany	Korea	4	2	Jazz	-99	2	5	feel lonely, sentimental...	2	1	1	0	1	0	0	0	0	0	0	0	5	6	5	4	4	5	4	3	5	4	5	4	5	5	5	5	5	15	13	14	15	4.5	5	4	4	5
33	2	UK	Taiwan	4	2	Rock and roll , piano , taiwanese pop songs	-99	5	7	argue with your boy friends , home sick , before bed ( sometimes its relax listen to sad music ) , miss your ex	6	4	1	1	1	0	1	0	1	1	0	0	7	7	7	7	7	7	7	7	7	7	7	7	7	7	7	7	7	14	20	22	12	5.5	4	5.5	2.5	6.5
29	1	Taiwan	Taiwan	4	2	IT DEPENDS	DRUM	7	6	-99	6	5	1	0	0	0	0	0	0	0	0	0	5	5	6	6	5	6	6	6	6	5	4	5	5	6	6	5	5	13	14	13	14	3.5	4.5	4.5	4.5	4
28	1	Japan	Japan	4	2	j-pops, classic	trombone	4	2	feeling lonely	2	5	0	0	0	0	1	0	1	0	1	0	-77	-77	-77	-77	-77	-77	-77	6	5	4	5	4	6	6	5	3	3	18	19	15	17	3.5	4	5	4	4.5
51	1	UK	UK	4	1	Opera, Baroque, Classical	-99	5	2	I don't think that my choice of a sad piece of music is necessarily determined by a situation. In the genres of music that I listen to, particularly opera, some pieces of music may be considered sad	6	3	1	0	1	0	1	0	1	1	0	0	6	6	7	6	7	2	7	7	7	7	7	7	4	4	4	1	5	22	19	23	7	3	5	7	4.5	7
25	2	UK	Taiwan	2	1	post-rock, experimental, chill-wave, electronica	synthesiser	6	7	when i am depressed, or need to chill for doing some research. sad song won't evoke aggressive emotion which is exactly i need!	7	2	0	0	1	0	1	0	0	0	0	0	-77	-77	-77	-77	-77	-77	-77	2	5	6	6	7	6	5	5	6	6	16	15	19	14	2.5	5.5	4.5	4.5	6
19	2	US	US	4	1	Rock, Country, Pop, Hardcore	I sing	5	6	I usually select sad songs at night after a long day when I'm alone in my room left alone with my thoughts.	4	5	1	1	1	0	1	0	1	1	0	0	5	7	6	7	7	7	6	7	7	7	7	7	7	7	5	5	6	24	23	17	16	7	4	4	5.5	4.5
32	1	Taiwan	Taiwan	4	2	Rock	-99	3	3	Feel sad (ex: recall the day that my cat missing).	6	2	0	1	0	0	0	0	0	0	0	0	-77	-77	-77	-77	-77	-77	-77	5	6	4	5	5	3	3	3	5	5	16	16	15	13	4.5	5.5	3.5	4	4
19	1	US	US	3	1	Acoustic and Electronic	Acoustic Guitar	3	4	Relationship troubles.	4	4	1	1	1	0	1	0	1	1	0	0	6	7	4	4	5	2	5	5	7	7	7	7	6	6	6	7	7	19	21	22	4	5	4.5	4	6	6
25	2	Taiwan	Taiwan	4	1	Indie Rock/Post-rock/House synthpop/Britpop	-99	4	1	I won't choose time listen any kind of music.	1	5	0	1	1	0	1	0	0	0	0	0	-77	-77	-77	-77	-77	-77	-77	4	5	6	6	6	4	4	4	6	2	21	20	18	6	2	6	5	6	6
26	2	China	China	3	2	light music	piano	3	6	low emotion,rainy day,feel lonely,think somthing sad,some sad music is graceful.	5	5	1	1	1	0	1	0	1	0	0	0	3	6	6	7	7	5	2	2	2	2	2	6	6	5	6	6	3	16	20	15	14	4.5	5.5	5	5.5	4.5
27	1	China	China	4	2	pop music	-99	3	5	saw sad movies	3	4	0	1	0	0	0	0	0	0	0	0	-77	-77	-77	-77	-77	-77	-77	4	7	5	6	4	3	2	3	6	5	8	17	11	16	1.5	5	3.5	4.5	3.5
30	1	China	China	4	2	-99	guitar	1	1	no, I am couldn't!	2	2	1	0	0	0	0	0	0	0	0	0	5	7	3	5	2	3	4	3	3	4	5	3	3	4	3	3	4	13	13	15	11	4	4.5	3.5	3.5	4.5
29	2	China	China	4	2	love songs	piano	2	5	when been dumpped	1	1	1	1	1	0	0	0	0	0	0	0	6	7	2	6	5	1	7	1	2	4	6	7	2	2	2	3	6	12	21	21	17	3	5	5.5	5	3
30	1	China	China	4	2	rock	-99	2	4	-99	2	1	1	0	0	0	0	0	0	0	0	0	6	6	4	4	5	5	4	5	5	5	4	5	5	4	5	5	4	13	16	13	12	3.5	4.5	4	4	5
27	2	China	China	4	3	popular music	-99	4	5	e.g. the sad music is very popular ,and when you listen,you will fell very warm	5	2	0	0	0	0	1	0	0	1	1	0	-77	-77	-77	-77	-77	-77	-77	7	2	4	6	5	2	2	2	7	6	11	18	17	13	4	4.5	3.5	5.5	4
28	1	China	China	4	2	Pop music	-99	2	4	Left a familiar city or person in the station, I will chose to listen to some sad music on my travel.	6	2	1	1	0	0	1	0	0	0	0	0	6	7	6	6	7	6	6	6	5	6	6	5	4	4	4	4	3	13	20	18	15	2.5	6	6	5.5	3.5
25	2	China	China	4	1	new age,pop	-99	4	2	-99	6	1	0	1	0	0	0	0	0	1	0	0	-77	-77	-77	-77	-77	-77	-77	4	4	2	5	6	4	6	6	7	3	22	18	20	19	2.5	6	5.5	2	7
25	2	China	China	4	2	pop	ok?voice	3	6	breakup with BF	6	2	0	1	0	0	0	0	1	1	0	0	-77	-77	-77	-77	-77	-77	-77	2	4	4	2	3	3	3	3	3	3	10	20	15	14	3	5.5	4	5.5	5
29	2	China	China	4	2	pop?rolling rock	-99	2	6	disappoint in love	6	2	1	0	0	0	0	0	1	0	0	0	6	6	7	6	3	4	5	6	3	4	6	6	4	6	5	6	5	12	19	19	17	3.5	6	4.5	4.5	6
28	1	China	China	2	2	peaceful music	-99	3	3	think of somebody	6	2	0	0	0	0	1	0	0	1	0	0	-77	-77	-77	-77	-77	-77	-77	6	7	6	6	6	7	6	6	6	6	16	16	19	15	5.5	5	6.5	4.5	6
27	1	China	China	4	2	rock	-99	2	6	regret,death	5	3	1	1	0	0	1	0	0	0	0	0	6	7	6	5	4	5	6	5	3	5	6	5	7	6	5	5	5	20	26	16	13	1.5	5.5	3	6	5.5
20	2	UK	China	3	1	Experimental, classical, jazz, etc	Piano	5	1	-99	2	5	1	0	1	0	1	0	0	0	0	0	5	6	5	7	7	7	5	7	6	7	5	5	6	6	6	7	6	20	14	20	18	5	5.5	3	4	4.5
30	1	China	China	4	1	classic	-99	3	5	missing sb	6	4	0	1	1	0	0	0	0	0	0	1	-77	-77	-77	-77	-77	-77	-77	6	7	6	7	5	7	7	6	7	5	17	14	18	14	5.5	4.5	4	4	5
47	2	Japan	Japan	4	2	popular music	flute	4	6	Under the bad weather, I'm tend to like listening to sad music. After an sad experience, I'd like to. When I am in a sacred mood, I'd like to.	7	2	1	1	1	0	1	0	1	0	0	0	6	5	4	6	5	5	6	6	5	6	6	5	5	1	4	3	4	19	21	14	8	4.5	4.5	2.5	5.5	6
25	2	China	China	4	3	popular	-99	1	2	feelling sad	4	1	1	1	0	0	1	0	0	1	0	0	6	5	7	5	5	5	6	2	5	5	3	4	2	2	2	1	1	9	17	19	12	2	4	6.5	3.5	4.5
28	2	China	China	4	2	Quiet slowly emotional	-99	3	2	I miss my family	3	4	0	1	0	0	0	0	1	0	0	1	-77	-77	-77	-77	-77	-77	-77	4	5	7	6	5	2	5	3	6	3	13	16	20	18	3.5	4	4	5	3.5
26	2	UK	Taiwan	2	1	rock , eletri, jazz	-99	4	6	break up with someone.or just by the mood , not particular timing.	6	5	0	1	0	0	0	0	0	0	0	1	-77	-77	-77	-77	-77	-77	-77	6	7	6	5	5	6	5	5	5	5	17	14	14	16	2	6	2	3	4
29	1	China	China	4	2	rock,light music	-99	3	6	feeling lonely, thinking about the past	5	5	1	1	1	0	1	0	0	0	0	0	6	4	5	6	7	1	6	5	4	5	5	3	4	4	5	1	4	14	16	17	13	3.5	5	4.5	5.5	5
19	2	US	US	4	1	Alternitive/ Scremo/Rock	-99	3	5	Unhappiness	7	6	0	0	0	0	1	0	0	0	0	0	-77	-77	-77	-77	-77	-77	-77	6	6	5	6	6	4	5	5	7	7	25	21	27	19	2.5	6	6	5.5	6.5
20	1	France	China	4	2	Instrumental	-99	5	2	When I was boring; When I missed my home; When I needed to calm down.	6	4	0	0	1	0	1	0	0	0	0	0	-77	-77	-77	-77	-77	-77	-77	5	6	7	4	4	2	5	4	3	6	12	12	7	5	3.5	4.5	4.5	6	5.5
28	2	Germany	China	4	2	pop music	-99	2	3	feeling lonely	2	1	0	1	0	0	0	0	0	1	0	0	-77	-77	-77	-77	-77	-77	-77	2	1	1	6	1	1	6	6	2	6	20	17	20	17	3.5	6	5.5	5	2.5
29	2	US	China	4	2	classical music	-99	1	1	None	2	3	1	1	0	0	0	0	0	0	0	0	7	7	6	7	7	6	6	4	4	6	6	7	7	7	7	7	7	21	24	25	14	6	6.5	6	6	6.5
27	2	Germany	China	4	3	-99	-99	1	1	-99	1	1	0	1	0	0	1	0	1	0	0	0	-77	-77	-77	-77	-77	-77	-77	5	6	6	6	5	5	5	4	4	5	17	12	15	14	1.5	4.5	5.5	3	6.5
26	2	Germany	China	4	2	Piano	-99	2	2	Remember Grandma who is in another world. When I got injured deeply in heart. When I am in a situation that any regret is invalid.	7	1	0	1	1	0	0	0	1	1	0	0	-77	-77	-77	-77	-77	-77	-77	7	7	7	7	6	5	4	5	6	7	21	22	23	12	4.5	6.5	3.5	5	4.5
22	2	Germany	China	3	2	pop music	-99	3	6	the person we love die disappointed in love.	7	4	0	1	0	0	0	0	1	0	0	0	-77	-77	-77	-77	-77	-77	-77	2	3	5	4	5	5	3	5	4	5	12	14	13	12	3.5	4.5	3.5	4	5.5
29	2	China	China	4	2	light music	-99	2	6	when I feel homesick or lonely	6	2	0	0	1	0	0	0	0	0	0	0	-77	-77	-77	-77	-77	-77	-77	2	2	3	4	6	5	5	6	6	4	15	19	21	20	2	6	5.5	5	3.5
29	2	China	China	4	1	pop	-99	2	2	feel frustrated	3	3	1	0	0	0	0	0	0	0	0	0	5	6	6	5	6	5	5	4	6	5	4	4	6	6	6	6	6	18	15	19	15	4.5	3.5	5.5	3.5	5
24	2	China	China	4	2	pop music and classical music	voice	6	6	1 writeing letters to my friends when I miss them. 2 feeling depressed but colud not brust into tears. 3 do something which is emotional.	6	5	0	1	1	0	1	0	1	1	1	0	-77	-77	-77	-77	-77	-77	-77	6	7	7	7	6	7	6	6	7	2	25	22	23	20	3.5	6	6	4.5	2.5
26	2	China	China	3	1	Classical Music and Chinesefolk Music	flute	4	5	feel at a loss or feel lonely.	4	3	0	1	1	0	1	0	0	0	0	0	-77	-77	-77	-77	-77	-77	-77	6	6	5	5	5	6	5	6	6	6	12	13	16	14	4.5	5	4.5	3.5	5
30	2	US	China and US	4	2	not very specific	piano	4	4	I don't seek out for sad music. It's mainly what comes up in radio.	3	3	1	1	1	0	0	0	0	1	0	0	5	5	5	6	5	6	6	2	1	2	3	6	4	4	4	3	1	5	20	12	7	3	5.5	5.5	6	4
28	1	China	China	4	1	rock and roll and classic music	-99	4	4	breaking up with girlfirend	3	3	0	1	1	0	0	0	0	0	0	0	-77	-77	-77	-77	-77	-77	-77	5	3	4	6	6	5	4	4	5	6	15	15	15	16	2.5	4.5	4.5	4.5	4
18	2	US	US	4	1	Country	-99	2	7	When me and a guy break up.	4	3	1	0	0	1	0	0	0	0	0	0	7	7	5	5	1	4	7	5	4	1	1	1	1	1	1	1	1	14	16	26	13	1	7	5.5	3	5.5
31	2	China	China	3	2	Light Music	-99	1	1	Nearly not!	1	1	1	0	0	0	0	0	0	0	0	0	2	1	2	1	6	1	1	2	1	1	1	1	1	1	1	1	1	15	18	21	10	5.5	6.5	6	6	3.5
23	1	China	China	4	2	Traditional Classical	-99	2	2	-99	4	3	0	0	0	0	1	0	0	0	0	0	-77	-77	-77	-77	-77	-77	-77	5	5	5	5	4	5	4	4	4	5	17	14	16	15	4.5	5	4	4.5	4.5
18	1	China	China	3	2	Classical music.	computer	4	3	Lonely, and so on.	3	4	0	1	0	0	1	0	0	0	0	0	-77	-77	-77	-77	-77	-77	-77	5	5	4	5	4	5	3	5	5	4	11	12	14	14	4.5	4	4	3	4
28	1	China	China	4	2	Orchestra, Solo Piano, OST and Smooth Jazz	I can play saxphone at basic level	4	5	argue with my wife, watch a war movie	5	4	0	1	1	0	1	0	0	0	0	0	-77	-77	-77	-77	-77	-77	-77	5	7	7	7	4	7	6	6	7	6	16	20	24	15	1	7	6	5	2.5
30	1	China	China	4	2	POP	-99	1	1	-99	1	1	1	0	0	0	0	0	0	0	0	0	3	2	4	6	4	1	5	3	4	3	3	3	3	3	3	3	3	13	12	12	11	4	4	4.5	4.5	4.5
22	1	China	China	4	1	modern music	non	7	5	when i am lonly and when I don't feel weel.	7	5	0	0	1	0	1	0	0	0	0	0	-77	-77	-77	-77	-77	-77	-77	7	7	5	6	5	2	2	2	1	6	16	11	18	8	3.5	5	4	4	4.5
23	1	China	China	4	2	-99	-99	7	5	Have some problem let me unhappy but can not tell the others	5	6	0	1	0	0	1	0	0	0	0	0	-77	-77	-77	-77	-77	-77	-77	6	5	5	4	4	3	2	1	3	4	20	16	19	23	2.5	6	3.5	2.5	5
30	2	China	China	4	2	pop music	-99	2	3	when feel lonely	2	1	0	1	0	0	0	0	0	0	0	0	-77	-77	-77	-77	-77	-77	-77	5	4	6	4	4	4	5	6	4	4	7	16	21	7	5.5	4	6.5	4	5
21	1	China	China	4	2	popular music	guitar	2	4	1.Sometimes,I recalls some what I have went through. 2.When I want to be quit.	6	2	1	1	1	0	1	0	0	1	0	1	2	1	1	1	2	2	2	3	1	2	3	3	2	3	3	3	3	16	21	16	16	3	5.5	4.5	6	3
21	2	Italy	Italy	4	1	Folk irish music, Hard Rock, Celtic music, Rock, Metal, Alternative rock	-99	5	6	-99	7	3	0	1	1	0	0	0	1	0	0	0	-77	-77	-77	-77	-77	-77	-77	6	7	5	7	7	4	4	4	7	6	25	26	25	15	2	4.5	6	5.5	7
26	1	China	China	1	2	national music	-99	1	2	moved,touching	4	4	0	1	0	0	0	0	0	0	0	0	-77	-77	-77	-77	-77	-77	-77	6	6	6	6	4	2	2	2	5	1	9	19	18	12	3.5	5	3	5.5	6
22	1	China	China	4	2	classic folk	-99	2	3	when i calm dowm	1	3	0	1	0	0	1	0	0	0	0	0	-77	-77	-77	-77	-77	-77	-77	2	4	5	4	6	2	3	5	6	4	16	14	12	15	2.5	5.5	5	3	2
28	2	China	China	3	1	opera	-99	2	3	-99	2	5	1	0	1	0	0	0	1	0	0	0	2	1	2	1	4	6	4	6	6	5	2	4	2	1	5	6	6	16	19	16	20	6	4.5	7	2	4
27	2	China	China	4	3	pop,classic	-99	3	6	when i feel pressured or i am homesick or just contront some bad things	5	4	0	1	0	0	1	0	0	0	0	0	-77	-77	-77	-77	-77	-77	-77	5	5	5	6	6	3	3	3	7	7	21	17	21	13	5	4.5	5.5	6	5.5
19	2	Canada	Canada	4	1	country	-99	5	7	feeling alone, left out, like a failure	5	4	1	0	0	0	1	0	0	0	0	0	5	7	5	4	4	3	5	4	5	5	5	5	4	4	4	5	5	19	15	21	13	4	5	6.5	5.5	5
26	2	US	China	4	2	ROCK	-99	1	2	When I would like to release my sad emotions I will choose sad music to help.	1	3	0	1	0	0	0	0	0	0	0	0	-77	-77	-77	-77	-77	-77	-77	1	1	1	1	1	1	1	1	1	3	15	16	11	14	3.5	3.5	5.5	4.5	6.5
21	2	Singapore	Singapore	4	2	RnB, Pop, Indie music, Musicals	-99	5	7	When I am disappointed in something or when I had a long and unfruitful day. Mostly when I am upset by something personal such as getting scolded or feeling offended.	5	5	0	1	1	0	1	0	0	1	0	0	-77	-77	-77	-77	-77	-77	-77	6	6	4	6	6	7	7	5	2	6	22	22	17	11	2	5.5	6	4.5	4.5
19	1	US	US	3	1	Metal/Rock	Guitar	2	7	When thinking about the past.	4	1	1	1	1	0	0	0	0	0	0	0	3	7	6	2	3	7	7	1	6	5	6	5	4	4	4	5	5	15	17	25	8	3.5	6.5	6	6.5	6
27	2	Germany	China	4	2	pop	-99	3	4	hurt by others miss home lost in exam being angry thinking about past or sb	6	2	0	0	0	0	1	0	1	1	0	0	-77	-77	-77	-77	-77	-77	-77	7	7	5	6	6	1	1	1	1	1	13	19	16	22	1	6.5	4	1	5.5
26	1	Germany	China	3	2	pop musik	-99	5	5	the government is so bad to the people	5	4	0	1	1	0	1	1	0	1	1	0	-77	-77	-77	-77	-77	-77	-77	3	3	7	5	5	6	6	6	3	3	10	12	15	10	6	6	7	5.5	7
20	1	US	US	3	1	electronica	digital music	3	5	I usually pair music with my current disposition, if I am energetic I tend to listen to very up-tempo music and if I am sad, somber music actually helps.	5	4	0	0	1	0	1	0	1	0	0	0	-77	-77	-77	-77	-77	-77	-77	7	7	6	5	6	5	5	5	6	6	20	15	20	9	6.5	5.5	6.5	5.5	5.5
24	1	China	China	4	2	rock and pop	-99	2	5	when i realized that i am sad, i would like to listen something to cheer me up!	1	2	1	0	0	0	1	0	0	0	0	0	1	2	7	6	6	5	6	1	5	4	6	6	2	2	2	4	1	16	19	18	10	3	5.5	6	3.5	6
33	2	China	China	4	2	Classical	-99	3	3	Want to calm down	4	5	0	1	0	0	1	0	0	1	0	0	-77	-77	-77	-77	-77	-77	-77	5	6	6	4	6	5	6	5	4	5	19	21	21	17	3.5	5	5.5	5	5
21	1	China	China	4	2	light music	-99	1	2	when i am sad and need smt to console me	2	1	0	0	0	0	0	0	0	1	1	0	-77	-77	-77	-77	-77	-77	-77	5	3	3	3	6	5	6	5	5	5	10	10	12	9	4.5	3.5	5	3.5	3.5
29	1	China	China	4	2	Country music	-99	2	2	evoked by some sad environment	1	1	0	1	0	0	0	0	0	0	0	0	-77	-77	-77	-77	-77	-77	-77	5	5	7	6	5	6	6	6	6	7	14	14	13	12	4.5	3	4	4.5	3.5
21	2	US	China	2	1	Classical	Pipa; voice	3	6	when i miss my past and when i broke up with my boyfriend	3	4	1	1	1	0	1	0	0	0	0	0	7	4	6	6	4	5	4	5	6	6	3	3	3	3	3	6	5	16	14	24	12	2	4.5	5	2	6
21	2	Singapore	Singapore	4	1	Pop, country, kpop	-99	4	6	When i am having a rainy bus ride home alone or experiencing sad experiences that moment of time.	7	3	1	1	1	0	1	0	0	0	0	0	7	7	5	5	6	7	7	5	5	6	6	6	4	4	4	5	6	23	18	19	22	6.5	4.5	5.5	1.5	4.5
22	1	China	China	4	2	pop music	-99	3	2	loneliness hurted……	2	1	0	0	1	0	1	0	0	0	0	1	-77	-77	-77	-77	-77	-77	-77	7	6	7	4	6	5	3	4	6	4	12	15	19	11	2	5.5	4.5	5.5	4.5
17	2	Australia	Australia	2	1	Pop, Rock, Classical	French Horn	4	6	Whenever I'm feeling low or depressed I will usually actively seek out a specific song to confirm my emotions. Similarly I have a playlist entitled Sad. Sometimes, however, I am merely in search of intense feelings	6	5	1	1	1	0	1	0	0	1	0	0	5	7	7	6	4	7	6	2	6	6	6	7	6	6	5	4	6	25	11	17	13	6	4	3.5	2	4.5
30	2	China	China	4	2	pop	-99	4	5	be alone in driving	1	5	0	1	0	0	1	0	0	0	0	0	-77	-77	-77	-77	-77	-77	-77	4	4	6	5	5	5	5	5	4	5	20	15	20	16	6.5	5.5	4	3.5	7
26	1	Germany	China	3	1	klass music	Flote	7	6	-99	1	6	0	0	0	0	0	0	1	0	0	0	-77	-77	-77	-77	-77	-77	-77	1	4	3	3	3	3	2	2	3	6	15	14	14	14	4.5	6	3.5	6	5
26	1	US	US	4	1	Pop, Classical,Soft Rock	-99	3	2	If I feel as though I need to reflect on emotional situations	1	3	0	0	1	0	0	0	1	0	0	0	-77	-77	-77	-77	-77	-77	-77	5	3	7	5	4	6	6	5	4	4	18	18	28	9	7	5	6	4	7
27	1	US	US	4	1	Pop, Rock, Alternative, Electronic, Dance	-99	4	5	When I'm in a depressive state; when I'm stressed out due to work or life events; when reflecting on past negative events	5	4	1	0	1	0	1	0	0	0	0	0	2	5	5	5	2	5	4	5	5	6	6	5	2	2	2	2	5	18	13	20	11	3	4	2	4.5	6.5
27	1	US	China	4	2	pop	-99	4	6	thinking about the past	6	2	0	1	1	0	0	0	0	0	0	0	-77	-77	-77	-77	-77	-77	-77	3	3	3	5	5	6	6	6	3	3	18	10	15	16	4.5	4	5.5	5.5	3.5
24	1	Russia	Russia	4	1	Classical	Guitar	5	5	I felt sad and wanted to increase my feelings.	6	5	1	0	1	0	0	0	1	0	1	0	2	6	7	6	2	7	4	7	6	6	6	5	5	6	7	7	6	23	15	14	2	4.5	4	5	5.5	7
27	2	US	US	2	1	Jazz, Pop and Classical	Piano	3	7	When I am struggling with life issues, loneliness and on my birthday when I think about my mother abandoning me it helps to get out all my emotions I stuff inside by listening to the sad music. It helps me cry, sometimes sob and I feel a release and calm	6	2	1	0	1	0	1	0	1	0	0	0	7	7	7	7	4	7	7	3	7	5	7	6	7	6	5	7	7	25	12	21	12	3	3.5	3.5	1.5	5
23	1	US	US	3	1	Folk	Guitar	5	1	-99	4	7	0	1	1	0	1	1	1	1	1	0	-77	-77	-77	-77	-77	-77	-77	2	4	6	5	7	7	7	7	3	5	18	21	25	6	1.5	6	6	5.5	5
25	1	Korea	Korea	3	1	Rock and Jazz	Bass guitar	2	6	Especially when I am sick and tired of my working. To be specific, sometimes I feel like I am doing same things everyday, being stupid, not developing myself at all.	7	2	1	0	1	0	1	0	0	0	0	0	7	7	7	6	2	5	2	6	7	4	6	6	6	6	6	2	1	10	13	10	17	4	2	4.5	3.5	3
28	2	China	China	4	2	pop, light music, folk songs	whistle	2	3	I usually just listen to songs randomly on a play list, then I encounter a sad one. If I think some sad songs are beautiful, I may listen to them when I miss them. I seldom search for sad music when I feel unhappy, I listen to happy songs	1	4	1	0	0	0	1	0	0	1	0	0	7	7	7	6	7	1	7	2	5	2	1	1	2	3	1	1	6	11	16	8	20	4.5	6.5	3.5	3	5.5
23	1	China	China	4	2	national music	-99	2	2	When not happy	5	2	0	0	0	0	1	0	0	0	0	0	-77	-77	-77	-77	-77	-77	-77	4	5	6	5	5	3	3	3	5	5	17	17	19	14	3.5	2.5	3.5	4.5	3.5
22	2	China	China	4	2	Pop music and Piano songs	-99	2	6	When I quarreled with my boyfriend or my mom , I tried to calmed down to make my mind a little bit pleasurable . What's more,before a test ,listening sad music can help me to awake my brains.(not too sad )	5	2	1	0	0	0	1	0	0	1	0	0	2	5	7	7	2	4	7	7	6	4	5	6	6	6	5	2	6	28	16	21	16	5	4.5	6	3	6
21	1	China	China	4	1	ROCK JAZZ POP HIP_HOT RAP classical	guitar	7	7	miss my lover and miss my parents	7	1	0	1	1	1	0	0	1	1	0	0	-77	-77	-77	-77	-77	-77	-77	2	7	1	3	5	4	4	4	4	5	18	20	19	19	5	6	2	2	5.5
21	2	China	China	4	2	pop,ballad	flute	5	4	When I want to recall my memory.	5	3	0	1	1	0	1	0	1	0	0	0	-77	-77	-77	-77	-77	-77	-77	5	6	3	4	2	4	3	5	3	5	15	19	17	10	2	7	6	5.5	5.5
19	2	China	China	4	2	Electronicmusic?Popular music	-99	3	2	when I heard some music with beautiful melody and make me get sympathetic response?I will listen to it whether or not sad music.	4	3	1	1	1	0	1	0	0	0	0	0	6	5	5	6	4	4	4	4	5	6	6	5	3	5	5	4	6	17	21	14	18	2	4.5	4	4.5	5.5
33	1	China	China	4	2	folk music	-99	2	3	homesick mad of work loneness	5	1	0	0	1	0	1	0	0	1	0	0	-77	-77	-77	-77	-77	-77	-77	5	6	7	6	4	6	6	4	6	2	7	17	11	7	3	3.5	3.5	5	5
20	2	China	China	3	2	pop music and rock'n'roll	-99	5	6	when I have some problems and someone makes me sad	6	3	1	0	0	0	1	0	0	1	0	0	6	6	5	5	4	5	6	4	2	4	3	5	6	5	5	2	2	17	19	23	16	4	6.5	5	3.5	3.5
21	2	China	China	4	2	-99	-99	6	7	In a bad mood , Lost relatives and friends...	5	4	0	0	1	0	0	0	1	1	0	0	-77	-77	-77	-77	-77	-77	-77	3	6	5	6	6	4	4	3	2	3	13	17	19	16	4	4	4	2	4.5
33	2	New Zealand	China	4	2	popular music	-99	2	2	During my twenties, when I broken up with my boyfriend, I listened to the sad music. Now I do not like sad music, because it evoke my bad mood. That is, I seldom listen to sad music.	2	1	1	0	0	0	0	0	0	0	0	0	5	6	7	7	1	4	6	1	1	4	4	1	1	1	1	1	1	10	17	19	15	1.5	6.5	5.5	3	2.5
28	1	China	China	4	2	Chinese traditional music	-99	3	2	-99	2	1	1	0	0	0	0	0	0	0	0	0	6	6	6	5	2	5	5	3	2	5	5	5	2	2	2	2	2	5	10	17	14	3.5	4	5	5	6
33	2	Japan	Japan	4	2	J-POP	piano	2	4	to think about my grandfather died seven years ago	4	1	1	1	1	0	1	0	0	0	0	0	6	6	5	6	5	2	7	2	6	3	5	4	2	2	3	6	5	19	19	17	16	2	6	5.5	6	4
30	1	China	China	4	3	-99	-99	2	6	-99	5	2	0	0	0	0	0	0	0	1	0	0	-77	-77	-77	-77	-77	-77	-77	2	1	2	2	3	5	5	5	4	3	18	20	21	9	3.5	4	6	3.5	6
20	2	US	US	4	2	country	-99	3	5	a break up or having a bad day or if anything wrong happens in my life.	5	1	1	1	0	0	0	0	0	1	0	0	6	6	3	7	5	4	6	5	6	7	5	4	4	5	4	5	5	16	13	16	9	3	5.5	6.5	6	6.5
21	2	US	US	4	2	indie rock	-99	4	6	i seek out sad music when i am going through rough patches with my significant other	7	2	1	1	1	0	1	0	0	0	0	0	2	7	6	4	2	5	4	4	4	4	4	4	4	4	4	4	4	14	14	14	14	4	4	4	4	4
20	2	US	Jamaica	4	1	r&b	-99	6	7	when im feeling lonlyl	7	4	1	0	0	0	1	0	0	1	1	0	4	7	7	6	6	7	7	7	6	5	6	4	5	5	3	4	4	18	20	17	16	3	4	3.5	3.5	4.5
24	1	Canada	Canada	3	1	Alternative	Piano	6	6	After a break-up. Feeling sad while missing my partner.	3	4	0	1	1	0	1	0	0	1	0	0	-77	-77	-77	-77	-77	-77	-77	5	4	6	6	7	5	6	5	5	7	17	21	22	15	1.5	6	5	4.5	6
20	2	US	Jamaica	4	1	randb	-99	5	4	when im alone and need to share my feelings	6	5	0	0	1	0	0	0	0	0	1	0	-77	-77	-77	-77	-77	-77	-77	7	7	5	5	4	5	6	6	7	6	17	23	20	19	2	5.5	3	4.5	5
21	2	US	US	3	1	country and contemporary christian	Voice, Clarinet	5	7	I seek out sad music whenever my husband has to leave for training, or when somethig sad happend in my family ex: death	7	4	1	1	1	0	1	0	1	1	0	0	7	7	7	5	7	7	7	6	6	4	7	4	5	5	5	7	5	25	15	27	14	5.5	5	6.5	2	5.5
28	2	Germany	China	4	2	Popular music	voice	5	6	For example I like to listen to sad music when I came across a sad story in novel, or when I was feeling anxious and needed something to calm myself down.	2	4	1	1	0	0	1	0	1	1	0	0	5	5	4	6	7	5	7	2	3	4	6	6	6	6	6	3	5	21	22	24	6	5	4.5	6	5.5	6
29	1	China	China	4	2	popular song	-99	2	1	Funeral march	1	1	0	0	0	0	0	0	0	0	0	1	-77	-77	-77	-77	-77	-77	-77	4	5	5	4	5	6	6	6	2	3	11	17	17	11	4	3.5	4	4	4.5
23	2	Singapore	Singapore	4	1	Rock	-99	6	5	When i'm feeling down. Or when i'm alone.	5	4	1	1	0	0	1	0	1	0	1	0	3	4	5	5	3	3	3	5	5	3	2	2	5	3	3	3	5	11	21	22	10	5	5	4.5	5.5	5.5
18	2	China	China	3	1	pop song	electronic keyboard	4	5	feeling sad	5	3	1	1	0	0	1	0	1	1	0	0	6	7	6	6	6	6	6	6	4	6	6	6	6	6	6	5	6	20	21	19	14	4.5	4.5	4.5	4	6
24	1	China	China	4	2	blue/New age/pop	-99	2	2	feeling sad or depressed	4	2	0	0	1	0	1	0	0	1	0	0	-77	-77	-77	-77	-77	-77	-77	5	7	5	5	3	3	3	3	5	6	22	16	12	11	2	4.5	5.5	3.5	4.5
35	2	China	China	4	2	Pop music	-99	2	3	feeling lonely	4	3	0	1	1	0	1	0	0	0	0	0	-77	-77	-77	-77	-77	-77	-77	2	2	3	3	3	3	3	3	2	3	21	18	17	14	5.5	4	5.5	5	2.5
36	1	China	China	4	2	popular	-99	4	4	-99	4	4	0	0	0	0	0	0	0	0	1	0	-77	-77	-77	-77	-77	-77	-77	4	4	5	5	4	4	5	4	5	4	14	14	14	14	4	4	4	4	4
32	1	China	China	3	2	pop	guitar	2	3	lonely	3	5	0	0	0	0	1	0	0	0	0	0	-77	-77	-77	-77	-77	-77	-77	3	3	3	4	4	3	3	4	4	4	14	15	14	12	3.5	4	4	3	4.5
18	2	China	China	1	1	-99	-99	1	2	-99	1	1	1	0	0	0	0	0	0	0	0	0	1	1	3	3	3	2	3	3	2	2	3	4	3	3	3	3	3	9	8	11	9	4	4	4	4	4
19	2	China	China	4	3	light music	-99	2	7	Thinking about the past.	7	2	0	0	0	0	0	0	0	1	0	0	-77	-77	-77	-77	-77	-77	-77	4	3	3	3	5	3	3	3	4	2	11	11	16	15	3.5	4	5	4.5	5
20	2	China	China	1	2	blue	-99	6	4	if i want to sleep,i would.	6	2	1	0	0	0	0	0	0	0	0	0	4	4	4	4	4	4	4	4	4	4	4	4	4	4	4	4	4	14	14	14	14	4	4	4	4	4
19	2	China	China	3	2	Rock,jazz,pop	-99	3	3	they sounds good	4	3	1	1	0	0	1	0	0	0	0	0	1	4	5	4	4	4	4	4	4	4	4	4	4	4	4	4	4	14	14	14	14	4	4	4	4	4
19	1	China	China	2	2	pop?light music	just my mouth	7	3	any time i feel happy or i have disire to sing something?i love sad music	4	7	0	1	0	0	1	1	0	1	1	0	-77	-77	-77	-77	-77	-77	-77	4	7	7	6	7	6	5	4	4	4	8	19	14	11	3	6.5	3	6.5	7
19	2	China	China	3	2	Gentle	Piano	7	7	When I feel too crazy and want to calm down.	2	7	0	0	1	0	1	0	1	1	0	0	-77	-77	-77	-77	-77	-77	-77	7	7	7	7	7	7	7	7	7	7	20	20	16	20	4	4	4	4	4
19	1	China	China	4	2	blues and jazz	guitar	3	2	losing my girl-friend...	4	2	1	0	0	1	0	0	0	0	0	0	4	2	2	4	5	1	4	4	4	4	4	4	4	4	4	4	4	14	14	14	14	4	4	4	4	4
18	2	China	China	4	2	k pop	flute	3	2	When l realized my dream can not be supported by my family.l will“goodbye my hopeless dream”.so l listened to sad music	7	2	1	0	0	0	0	0	1	0	0	0	7	5	3	5	3	5	6	6	1	5	6	6	4	5	5	5	5	16	16	14	16	2	4.5	5.5	5	3
19	1	China	China	4	2	pop	-99	5	1	-99	5	6	0	0	0	0	1	0	1	0	0	0	-77	-77	-77	-77	-77	-77	-77	4	3	5	4	4	5	5	4	3	4	20	20	19	16	5	4.5	3.5	3	6
18	1	China	China	4	1	JAZZ	GUITAR	4	4	-99	3	3	1	0	0	0	0	0	0	0	0	0	2	2	2	2	2	1	1	1	1	1	1	1	1	1	1	1	1	14	14	14	14	4	4	4	4	4
19	1	China	China	2	1	-99	-99	7	5	-99	3	4	0	1	0	0	1	0	0	0	0	0	-77	-77	-77	-77	-77	-77	-77	3	3	3	5	7	1	4	3	5	1	19	16	17	12	6	1.5	4	7	1
22	1	China	China	4	2	-99	-99	6	4	-99	2	5	1	0	0	0	0	0	0	0	0	0	3	6	5	6	3	3	3	4	4	4	4	4	4	4	4	4	4	9	20	12	11	4	4	6	5	4
27	2	China	China	3	1	r&b rock	pipa	1	2	get lost	1	1	0	0	0	0	0	0	1	1	0	0	-77	-77	-77	-77	-77	-77	-77	3	6	5	7	5	3	2	4	6	5	16	17	20	15	4	6.5	4	4	4
18	2	China	China	4	1	pop music	flute	3	5	when i want to calm down or i feel some sad	6	3	1	1	1	0	1	0	1	1	0	0	5	5	2	4	5	4	3	3	5	5	4	4	3	3	4	3	4	15	14	15	15	3.5	4.5	3.5	3.5	3
19	1	China	China	3	2	no	-99	5	4	many song of chinese	3	4	0	0	1	1	0	0	0	0	0	0	-77	-77	-77	-77	-77	-77	-77	4	3	5	6	2	5	3	6	7	4	15	16	14	12	3	5	4.5	2.5	6.5
18	2	China	China	3	1	pop and classical music	piano	2	2	If I feel unhappy or I meet something sad, I may choice the sad music.	3	4	0	0	0	0	0	0	0	1	0	0	-77	-77	-77	-77	-77	-77	-77	3	2	4	3	4	2	3	5	2	4	6	14	14	12	2.5	4	1.5	4.5	2.5
18	1	China	China	3	1	-99	-99	5	5	-99	5	3	1	0	0	0	0	0	0	1	0	0	5	6	5	5	7	5	4	5	6	5	4	4	4	4	5	5	5	15	20	20	14	2.5	5	4	5	4.5
18	2	China	China	3	2	classical music	clarinet	4	3	-99	3	2	1	0	0	0	0	0	0	0	0	0	7	6	5	4	6	6	3	6	2	1	5	5	6	6	7	2	3	17	17	15	17	4	4	4	4	4
19	2	China	China	4	2	classical music	-99	3	4	When I got my heart broken?	4	2	1	0	0	0	0	0	0	0	0	0	6	6	5	4	3	4	5	5	5	3	4	5	6	5	4	3	5	17	22	17	12	2.5	4	6	5.5	3.5
19	2	China	China	3	2	pop music	guitar	4	4	Breathless	7	2	0	0	0	0	1	0	0	0	0	0	-77	-77	-77	-77	-77	-77	-77	3	7	5	4	4	5	5	4	3	4	14	14	14	14	4	5	4.5	4	4
19	2	China	China	3	2	light music	-99	3	5	-99	4	4	0	0	1	0	1	1	1	0	0	0	-77	-77	-77	-77	-77	-77	-77	2	1	1	2	2	3	3	3	4	4	13	14	8	16	3.5	5	3	6	3.5
19	2	China	China	3	2	classical	violin	3	4	feel . lonely cry want to cry feel angry	2	1	0	1	0	1	0	0	1	0	1	0	-77	-77	-77	-77	-77	-77	-77	2	5	6	2	3	4	5	5	4	3	10	12	13	11	3	4	3	4	4
29	2	Russia	Kyrgyzstan	4	1	soul, ethno, folk, rock, punk, gothic rock, fusion	piano	6	3	I definitely listen to sad music when I felt anger and aggression during the day and in the evening devastation came to me. When I feel bad, I only listen to the silence, and it is the best of all sad melodies. But also when I need to call the tears	5	2	1	0	1	0	0	0	1	0	1	0	2	6	7	1	4	4	1	7	2	4	6	7	7	7	7	6	5	18	14	13	14	3	4.5	1	2.5	7
20	2	China	China	1	2	-99	-99	3	2	Fail or Sad	4	3	0	1	0	0	1	0	1	0	1	0	-77	-77	-77	-77	-77	-77	-77	5	6	4	5	7	3	5	2	4	6	14	15	10	16	3.5	3	5.5	2	2.5
18	1	China	China	3	1	-99	guitar	7	7	When I miss the past.	7	7	1	1	0	0	0	0	0	0	0	0	6	6	6	6	6	6	5	6	5	6	6	6	5	6	6	6	5	14	13	16	11	4	4.5	4.5	4	3.5
18	1	China	China	3	2	country music	-99	5	7	just feel uncomfortable or sad.	7	4	1	0	0	0	1	0	0	0	0	0	5	6	4	5	5	7	6	7	6	5	6	6	3	5	5	3	4	21	16	20	14	3.5	4.5	4.5	4	5
20	1	China	China	3	1	folk pop	-99	5	5	with low mood & be crossed in love & miss my friend	7	1	1	0	0	0	1	0	1	1	0	0	6	7	7	7	7	6	5	5	6	5	6	5	7	5	6	6	5	15	15	14	17	4	4	4.5	3.5	4
20	1	China	China	4	1	blue music and calming music	-99	6	7	sitting alone thinking about life	7	7	1	0	1	0	1	0	0	1	0	0	5	4	5	5	4	6	5	7	7	7	5	6	5	5	7	5	6	12	19	12	12	4	6	4	5.5	4.5
50	2	US	US	3	1	orchestral-opera-romantic classical, pop & soft rock, oldies, dance, holiday	piano and flute equally	2	3	When I am feeling nostalgic, sad about something.	2	2	1	0	1	0	1	0	0	0	0	0	6	7	5	1	5	6	7	5	7	7	7	6	7	7	7	5	5	20	16	26	3	6	6.5	6.5	5	5
30	2	Poland	Poland	4	1	jazz, classical music	-99	4	4	Feeling depressed	3	4	1	1	1	0	1	0	0	0	0	0	5	5	4	5	5	5	6	5	4	4	4	5	5	5	5	6	4	17	12	20	17	3.5	4	4	1.5	6.5
21	1	US	US	4	2	ALl	-99	2	3	No	2	4	0	1	0	0	0	0	0	0	0	0	-77	-77	-77	-77	-77	-77	-77	2	4	5	5	4	4	4	4	2	5	12	19	19	5	6	5	6.5	6.5	6
19	2	US	US	3	2	Everything but country	voice	2	2	I rarely actively seek out sad music but when I'm in a more introspective mood, I seek them out for the soothing beat.	3	2	0	0	1	0	1	0	1	0	0	0	-77	-77	-77	-77	-77	-77	-77	4	3	3	5	3	5	5	5	2	2	26	14	15	16	4	3.5	3.5	2.5	3
29	2	US	Canada	2	1	Electronic	Bassoon	3	6	Sometimes I seek pieces of music which are beautiful but happen to be sad. Other times I choose sad music because I want to go deeper into my feelings of sadness to explore and express them.	5	2	1	0	1	0	0	0	0	1	0	0	4	5	7	5	7	7	5	4	4	1	6	1	6	6	6	6	7	25	21	26	15	3	3.5	2.5	2	6
26	2	UK	Korea	2	1	Classic, jazz, pop	Piano and violin	4	3	I don't really seek out to listen to sad music based on specific situations, but I don't prefer to listen to those music when I'm sad.	3	4	1	0	1	0	0	0	0	0	0	0	5	6	6	6	6	5	5	2	2	2	5	5	6	5	4	4	5	21	20	23	14	4.5	5	6	5	6.5
19	2	Canada	Canada	4	1	country	-99	4	4	-99	4	4	0	1	0	0	0	0	0	0	0	0	-77	-77	-77	-77	-77	-77	-77	4	4	4	4	4	4	4	4	4	4	14	14	14	14	4	4	4	4	4
21	2	US	US	4	1	Electronic Music	-99	3	6	When I am feeling sad, lonely, thinking about the past, experiencing a sad life event.	6	2	1	0	1	0	0	0	1	1	0	0	7	7	6	6	7	7	6	5	7	6	6	6	5	5	5	5	6	19	20	21	16	5.5	5.5	5	4	5
22	2	Singapore	Singapore	3	1	No specific genre	Piano	5	3	When I am on the way home, when I am going to bed.	2	4	0	0	0	0	0	0	0	0	0	1	-77	-77	-77	-77	-77	-77	-77	5	5	6	6	6	5	5	5	5	4	17	14	22	10	3.5	5.5	4.5	4.5	4.5
20	2	Singapore	Singapore	4	1	Pop, rock, indie	-99	6	6	Loneliness, reflective mood	6	5	0	1	1	0	0	0	0	0	0	1	-77	-77	-77	-77	-77	-77	-77	5	2	6	6	6	2	2	2	2	3	11	21	17	12	2	5.5	3.5	4	5
30	2	Italy	Italy	4	2	Rock and Opera	-99	4	5	When I think about past and memories	3	4	0	0	1	0	0	0	1	0	0	0	-77	-77	-77	-77	-77	-77	-77	3	5	5	6	4	5	5	5	6	6	21	16	15	14	4.5	4.5	4.5	3.5	5
27	2	Italy	Italy	4	1	I don't have a precise genre, I listen music from the 70's 80's 90's	voice	4	6	When I think about a person who's no longer with me, ex boyfriend	4	3	1	0	1	0	0	0	0	0	0	0	7	7	7	6	5	1	5	4	6	6	6	7	7	7	7	7	6	27	24	27	14	4.5	7	2.5	4.5	6.5
24	1	UK	Italy	1	2	Baroque, Classical	Cello	1	1	I never listen on purpose to sad music, even if I'm sad.	1	1	1	0	1	0	0	0	1	0	0	0	5	6	6	6	7	1	7	1	6	7	7	6	6	6	6	7	5	18	17	18	14	4	6	6	5	6
28	2	UK	Greece	4	2	Classical	-99	2	5	-99	3	1	1	0	1	0	0	0	0	0	0	0	5	7	5	7	7	6	5	1	6	5	4	5	6	6	7	4	4	20	20	24	16	5	5	5	4	4.5
25	1	Germany	Italy	4	1	Pop, Rock, Electro	voice	4	4	If I feel lonely or thoughtful	6	3	0	0	1	0	0	0	0	1	0	0	-77	-77	-77	-77	-77	-77	-77	4	7	7	7	5	7	7	7	7	7	16	11	20	17	3.5	3.5	5	2.5	5.5
25	2	Austria	Mexico	4	1	Jazz/Blues	-99	5	3	I find it easier to feel empathy for this world.	5	5	0	1	1	0	1	0	1	1	0	0	-77	-77	-77	-77	-77	-77	-77	7	6	4	7	6	5	5	5	5	6	11	19	21	16	4	4	3	3	4.5
23	2	Germany	Lithuania	4	1	Reggea, Dubstep, Ambient	-99	3	7	Found out I'm not productive at work and I might be fired When I work all day on my laptop to write my paper and the result wasn't satifying When I think I don't have a group of people where I can feel like I belong to	5	2	0	0	1	0	1	0	1	0	0	0	-77	-77	-77	-77	-77	-77	-77	6	6	6	7	6	4	4	4	6	2	19	25	21	17	7	6	4.5	6	4.5
27	2	Germany	Italy	4	2	post-rock, indie rock, world music, folk music	-99	5	3	Mostly during the evening; while reading a book; many times travelling by train	6	5	0	0	1	0	1	0	0	1	0	0	-77	-77	-77	-77	-77	-77	-77	7	7	7	4	6	6	4	4	6	6	19	17	21	14	4.5	4	3.5	4.5	4.5
30	2	UK	Poland	4	1	Rock, Soul, Blues, classic, folk, alternative	voice	3	5	Break up.	5	2	1	0	1	0	0	0	0	1	0	0	5	7	5	5	2	5	6	2	4	2	3	4	5	5	5	2	1	13	20	16	12	4	3.5	4.5	5	5.5
31	2	Greece	Greece	4	2	Rock	-99	3	4	When I feel depressed	5	7	1	1	1	0	0	0	1	1	0	0	1	6	6	6	3	7	1	5	5	6	2	6	6	6	6	2	4	19	23	20	11	6	5.5	2.5	3	5
29	1	Italy	Italy	3	2	Ska, Reggae, Folk, New wave	Guitar	2	4	When I am thoughtful about recent occurrencies or imminent decision I have to take	3	2	0	0	1	0	0	0	0	0	0	0	-77	-77	-77	-77	-77	-77	-77	6	6	2	6	7	6	2	2	5	6	18	24	23	8	4.5	6.5	6	6.5	4.5
18	2	US	US	3	1	Show tunes, pop, jazzy soulful kinda music.	Voice, ukulele, kazoo	3	4	-99	2	2	0	0	0	0	1	0	1	0	0	0	-77	-77	-77	-77	-77	-77	-77	5	6	6	5	5	6	6	6	6	6	25	15	17	20	7	6	6.5	2	4
26	1	Italy	Italy	4	1	rock,electronic music	-99	2	6	Usually when I feel sad because I'm missing something or someone, because it is too far away in time or space	6	2	0	0	1	0	0	0	1	0	0	0	-77	-77	-77	-77	-77	-77	-77	5	5	7	6	3	2	2	2	1	2	21	15	16	6	3	4	6	5.5	4.5
27	1	UK	Italy	4	1	New romantic, New wave, Synth pop, Jazz, Progressive 1970s	-99	7	7	Actually most of the time, whenever I feel or don't feel low.	7	6	1	1	1	0	0	0	0	0	0	0	6	6	5	7	1	7	4	1	3	6	6	5	5	5	5	3	3	18	16	16	14	2	7	6	4	4
25	2	Italy	Albania	4	1	Jazz	-99	2	5	-99	3	2	0	0	1	0	0	0	0	1	0	0	-77	-77	-77	-77	-77	-77	-77	2	5	6	7	6	4	4	4	2	5	11	17	20	14	6.5	6.5	2.5	5.5	6.5
28	2	Australia	Italy	4	1	Electronic music	-99	2	7	-99	6	2	1	0	1	0	0	0	0	0	0	0	1	4	5	6	1	1	1	2	4	4	2	5	1	1	1	1	2	8	10	18	12	3	3	5	2	5
27	1	Italy	Italy	4	2	Indie Rock and Electronic	-99	2	4	When I am thoughtful, after a sad news or when I have to think about something important for me.	4	2	0	0	1	0	1	0	0	0	0	0	-77	-77	-77	-77	-77	-77	-77	6	6	1	6	4	1	1	1	1	4	12	18	18	6	2.5	5	6.5	6.5	4.5
26	1	France	Italy	4	2	Songwriters	-99	2	4	-99	1	5	0	0	1	0	0	0	0	0	0	0	-77	-77	-77	-77	-77	-77	-77	1	2	2	3	2	2	2	2	2	2	13	20	18	14	3.5	3.5	6	6	6
35	1	UK	Malaysia, Singapore, England, USA & India	4	1	Indie Rock, Classical, Film soundtracks, Hip Hop, Electronic, Reggae & Ragga	-99	4	1	I don't specifically 'seek' out sad music. If I like the sound of something I'll listen to it. It all depends on ones perception of sad music.	2	5	1	1	0	0	1	0	1	1	0	0	5	7	5	4	5	1	7	1	6	4	4	4	4	4	4	1	5	19	22	27	11	4	5	4.5	2.5	5.5
27	1	Italy	Italy	3	1	Hard Rock, Funk, Rock, Pop	Guitar	3	7	Thinking about the past, Love not matched, Bad weather.	6	2	0	0	1	0	1	0	0	0	0	0	-77	-77	-77	-77	-77	-77	-77	5	5	4	6	2	6	2	6	7	3	8	21	19	12	1	5.5	4.5	6	6
30	2	UK	Hungary	4	1	not one particular genre, but mostly lively music like music in Zumba	-99	2	5	after watching a movie, a musical (Hair), if i really got into the mood; after being nostalgic (e.g. Love story)	5	6	1	0	1	0	0	0	0	1	0	0	7	5	7	6	4	6	6	2	4	7	5	4	6	6	3	5	5	27	19	24	17	7	7	6.5	5	5
27	2	Italy	Italy	4	1	Indie, rock, folk rock	-99	5	5	when I'm actually feeling sad, depressed or lonely	4	5	1	1	1	0	1	0	0	0	0	0	5	6	5	5	6	5	4	6	6	5	6	6	6	6	6	6	6	20	15	19	13	4.5	4.5	6	4	6
27	2	Italy	Italy	4	1	Various	-99	5	7	Memories about a dead friend. Thinking about my old boyfriend.	7	2	1	1	1	0	0	0	1	0	0	0	7	7	6	6	3	7	7	4	4	5	7	3	3	3	4	4	3	20	14	14	15	5	4	4.5	2.5	5
31	2	Italy	Turkey	4	2	Jazz	-99	2	2	I generally do not seek out sad music, by chance if somebody (e.g friends) suggest me a good song, even it is sad I listen.	2	1	0	1	1	0	0	0	0	0	0	0	-77	-77	-77	-77	-77	-77	-77	1	1	4	2	4	4	4	4	1	5	23	20	22	21	5.5	7	4.5	3	7
27	2	Italy	Italy	3	1	Classical, Contemporary Jazz, Latin, Italian pop/folk	Flute	3	4	When I am sad, sometimes I listen to sad music because it often makes me cry, and by crying I manage to unload sadness. Afterwards I typically feel more in armony with the world and I have clearer in mind that love and emotions are truly the most importa	4	2	1	1	1	1	0	0	0	1	0	0	2	4	7	7	6	6	4	6	7	1	5	5	5	3	5	5	5	14	10	19	23	3.5	4.5	7	2	7
22	2	US	US	1	1	Classical	Organ	2	1	I don't generally listen to sad music.	2	2	0	0	1	0	0	0	0	0	0	0	-77	-77	-77	-77	-77	-77	-77	2	2	5	2	4	1	1	1	1	5	12	13	10	6	3	2.5	7	6	4.5
22	2	US	US	4	1	alternative	voice	3	6	Arugments with friends or family. Romantic relationship issues.	2	2	1	0	0	0	0	0	1	0	0	0	6	7	6	3	6	5	5	2	2	4	7	6	3	3	5	7	7	24	21	27	18	5.5	6.5	7	4	6
21	2	Singapore	Singapore	4	2	Pop	-99	3	5	When I am feeling down.	4	3	1	1	1	0	1	0	1	1	0	0	4	4	4	4	4	4	4	4	4	4	4	4	4	4	4	4	4	14	14	14	14	4	4	4	4	4
20	2	US	US	4	1	Classic Rock, Dance Pop, Classical, Blues, Swing, Techno, Orchestral, Musicals	-99	4	7	I seek out sad music when I am lonely. It makes me feel like my experience is not abnormal and that there are others out there just like me. It makes me feel included.	6	5	1	0	1	0	1	0	0	1	1	0	7	6	7	5	7	7	5	4	7	7	7	7	6	7	2	7	7	28	15	25	26	1.5	4.5	2.5	1	4.5
42	1	Germany	Germany	4	1	rock, jazz, blues, country, classic	-99	1	1	-99	2	3	0	0	0	0	0	1	0	0	1	0	-77	-77	-77	-77	-77	-77	-77	1	1	1	1	1	1	1	1	1	1	13	11	10	9	5.5	5	4	4.5	6.5
30	1	Germany	Germany	4	2	Rock, HipHop	-99	3	7	-99	4	4	1	1	1	0	1	0	1	1	0	0	6	5	4	5	3	7	6	6	5	6	4	5	4	4	4	3	4	16	15	16	6	3.5	3.5	6	6	5.5
33	1	Germany	Germany	4	2	Rock, Hip Hop, Reggae	-99	2	4	-99	3	6	0	1	1	0	1	0	0	0	1	0	-77	-77	-77	-77	-77	-77	-77	6	6	6	6	5	4	5	4	4	4	8	18	21	14	5.5	3.5	3.5	4.5	6.5
22	1	US	US	4	1	Metal	-99	2	2	I don't really seek out sad music. I just notice that I don't skip it when it comes on when I'm feeling down.	2	1	1	1	0	0	0	0	0	0	0	0	6	6	6	7	5	1	2	2	2	3	5	4	4	4	4	7	5	25	25	23	11	4.5	5	5	2.5	6.5
24	1	Germany	Germany	3	1	classical, african rhythms and movies soundtracks	african drums	5	3	I like sad music, but it usually doesn't make me sad. It rather makes me emotional and open to releasing sadness, or rejoicing in the happy endings. It rather supports me. usually i listen to sad musik when i'm taking a walk (on the street, park etc.)	6	4	1	1	0	0	1	0	1	0	0	0	5	6	7	2	6	7	5	6	4	5	6	6	5	3	3	2	4	17	12	17	11	2.5	4	6.5	3.5	3.5
24	2	Germany	Germany	4	1	alternative, indie, electro, singer-songwriter	-99	5	4	When I'm sad and think of the past, but I also like to listen to sad music when I'm happy...	5	5	0	1	1	0	1	0	0	1	0	0	-77	-77	-77	-77	-77	-77	-77	5	6	6	6	2	5	4	4	5	4	17	18	17	10	2	6	6	5.5	4
27	2	Germany	Germany	3	1	Rock, Jazz	Violin	3	5	I enjoy listening to sad music most, when I am alone, so I can indulge myself in the sound.	6	7	0	1	1	0	1	1	0	1	0	0	-77	-77	-77	-77	-77	-77	-77	5	5	3	2	2	5	4	3	5	2	23	18	21	14	4.5	4.5	6	5.5	7
18	2	US	US	4	1	Indie-rock, rock, r&b, hip hop, Indie, folk	-99	7	7	Whenever I am feeling bad about myself I actively choose to listen to a sad playlist I have made. When I am happy I still choose to listen to said playlist.	7	7	1	0	1	0	1	0	0	0	0	0	7	7	7	7	7	7	7	7	7	7	7	7	7	7	7	7	7	24	25	25	8	1.5	4	1.5	7	3.5
20	2	Singapore	Singapore	4	1	Indie, pop rock, country, folk, rap, hip hop, rnb	Voice, guitar	6	6	When i am having a bad day	7	5	1	1	1	0	1	0	1	1	0	0	7	7	7	7	7	6	7	7	7	7	7	7	7	7	7	7	7	26	26	25	20	5.5	4	4	3	5.5
34	1	Germany	Germany	4	1	chilled electro, liquid dnb, minimal	-99	5	5	if unsatisfied with my work or my friendship environment, unsadisfied with development of love to an unreachable girl	5	3	0	1	1	0	1	1	0	0	0	0	-77	-77	-77	-77	-77	-77	-77	6	6	6	5	7	5	7	7	7	6	17	26	18	8	3.5	4.5	3	4.5	6.5
23	2	Germany	Germany	4	1	Indie	-99	2	6	In situations i feel happy or when i try to relax	1	5	1	1	1	0	1	0	0	1	0	0	2	6	3	5	7	5	2	1	4	5	5	5	1	1	1	3	5	25	19	25	17	4	6	3	3	6.5
47	1	Germany	Germany	3	1	post punk, new wave, dub, hip hop, * metal, ska, independent (not! alternative)	keyboards	5	5	Any situation where I need to feel good, that is: A problematic situation where I need to keep/become calm but not indifferent/impassionate. A nice situation where I need a reference system to measure how nice I have it now and to prolongue the happine	6	6	0	1	1	0	1	1	1	1	1	0	-77	-77	-77	-77	-77	-77	-77	7	7	7	7	7	3	4	5	3	5	14	18	15	19	7	3.5	3.5	5.5	4.5
26	2	Germany	Germany	4	1	Electronic, Soul, independent	-99	4	4	when i am in the mood for deep emotions and thoughts, when I'm in a philosophic mood and feel like writing when I want to concentrate on a problem or argument Iwant to sort out, when I feel lost in this world	5	5	0	1	1	0	1	0	1	1	0	0	-77	-77	-77	-77	-77	-77	-77	5	5	6	6	5	3	3	3	4	3	17	21	14	6	3.5	4	6	6	5.5
22	1	US	US	3	1	rock/blues/metal/classic	Guitar, Bass, Drums, Vocals, Harmonica	2	6	When thinking about good times with an ex.	3	1	1	0	0	0	0	0	0	0	0	0	7	7	5	7	7	1	5	1	1	1	1	1	1	7	3	1	1	19	2	19	12	3	2	4.5	3	6
25	2	Germany	Germany	3	1	Hip-Hop, R&B, Soul, Jazz	Voice	4	7	when I aim to overcome strong (mostly sad) feelings, when I think about ones that I love	6	3	0	1	1	0	1	0	1	1	1	0	-77	-77	-77	-77	-77	-77	-77	7	7	6	7	7	5	6	4	3	2	23	24	20	16	5	4	6.5	4	5.5
67	2	Germany	Germany	4	1	classic, Blues,Folk	-99	3	4	when I feel lonely, especially, when I'm missing a beloved person	4	2	0	1	1	0	1	0	1	0	0	0	-77	-77	-77	-77	-77	-77	-77	2	1	2	1	1	2	2	1	1	1	20	19	21	19	2.5	4.5	6	4.5	6.5
21	2	US	US	4	1	Rock, Alternative Rock, Post-Hardcore, R&B	-99	5	7	When I feel overwhelmed or stressed by family or work or school	5	4	0	0	0	0	1	0	0	0	0	0	-77	-77	-77	-77	-77	-77	-77	6	7	7	4	7	5	6	5	7	7	27	24	27	9	1.5	5	6	4	5
58	1	Germany	Germany	4	1	rock, folk	-99	5	6	when i`m lying on the beach, alone in my flat	2	5	0	0	1	0	1	0	1	0	0	0	-77	-77	-77	-77	-77	-77	-77	6	6	6	7	6	2	2	2	5	3	17	15	20	14	6.5	3.5	4	6	6.5
53	2	UK	UK	3	1	Soul and Classic	Piano	2	4	To help me to release pent up emotion or recall specific events.	4	3	0	0	1	0	1	0	0	0	0	0	-77	-77	-77	-77	-77	-77	-77	6	6	6	5	3	2	2	2	1	1	11	18	24	12	2.5	5.5	5.5	2.5	5.5
24	2	Germany	Germany	4	2	Alternativ-Metal, New Prog, Rock, Electro, Pop, Indie	-99	2	7	When I think of my fahther, who died when I was sixteen.	5	2	1	1	1	0	0	0	0	0	0	0	7	7	7	6	5	7	7	7	7	7	4	2	1	1	1	1	6	26	23	23	10	6	4.5	7	7	6.5
18	2	US	US	3	1	French Disco House, Grunge, Dubstep, Classic Rock, Rap, R&B, Dance, Techno	Piano	4	7	When I feel like I am going to or need to cry. I do the same thing when I'm angry, I seek out angry music.	6	4	1	0	1	0	0	0	0	0	0	1	7	7	6	4	3	6	6	3	3	2	3	3	4	4	4	2	2	15	13	6	16	2	4.5	4	2.5	5.5
30	2	India	India	3	1	hindustani classical music, bollywood music, western classical	sarod, guitar	2	5	I feel very low after listening to sad music, thats why I avoid listening to sad music. When I am feeling very low, disappointed, hopeless, dejected I listen to sad music.	5	1	1	0	0	0	1	0	0	0	0	0	7	7	7	7	6	7	7	7	7	4	7	7	5	5	5	7	7	10	7	17	17	5.5	5.5	3.5	5.5	5
28	2	India	India	3	1	Western Classical instrumental, Indo-western fusion, Indian Ragas	Harmonium, Key board	4	3	Sweet memories of childhood, memories of my late grandfather, some kind of an insight or realizations which I have at times.	4	5	0	1	1	0	1	1	0	1	1	0	-77	-77	-77	-77	-77	-77	-77	6	7	7	7	7	7	7	7	7	7	11	20	12	9	2	5.5	7	7	7
25	2	US	India	1	1	Indian Classical, Jazz, Western Classical	Violin	2	2	Nostalgia	5	1	1	0	1	0	1	0	1	0	0	0	1	1	1	7	1	3	5	2	6	6	1	2	2	3	2	1	2	20	8	22	10	2.5	6	3.5	5	7
28	2	India	India	3	1	classical, soft rock, blues	voice	4	5	when feeling nostalgic about the past or feeling lonely	5	3	0	1	1	0	0	0	0	0	0	0	-77	-77	-77	-77	-77	-77	-77	5	6	6	6	5	6	6	6	4	5	24	20	25	10	4	6.5	5.5	6.5	7
25	2	India	India	3	1	Indian Classical-Carnatic and Hindustani, Rock, Fusion, Country Music	Voice	3	5	1. When I feel depressed and hopeless 2. When I feel better after being upset, I listen to sad songs I like to see how much they affect me. 3. Sometimes, I listen to them just because they are wonderful compositions.	4	4	0	0	1	0	0	0	1	1	0	0	-77	-77	-77	-77	-77	-77	-77	4	5	6	5	7	5	6	4	2	2	16	24	26	18	2	7	4	3.5	6.5
23	1	India	India	2	1	Carnatic, Hindustani, Fusion, Rock, Pop	Mridangam	5	3	-99	6	3	0	1	1	0	0	0	0	0	0	0	-77	-77	-77	-77	-77	-77	-77	5	6	6	5	2	3	5	3	4	4	8	15	12	12	6.5	5	6	4.5	6
78	2	Estonian Republic	Estonian Republic	1	2	symphonic music, keyboard music, opera, chamber music popmusic	harpsichord, piano	6	4	* for the pain in muisc * for high level performance * for professional interest (texture, genre etc.)	3	3	0	1	0	1	0	0	0	1	1	0	-77	-77	-77	-77	-77	-77	-77	7	7	6	6	6	7	7	7	7	7	14	18	11	15	4	1	4.5	4	5
26	2	Finland	South Africa	2	1	metal, rock, indie, art music especially romantic era, electronica	flute, piccolo, piano, voice, guitar - from best to worst.	6	7	When traveling alone on a bus by myself going home from work at night. When leaving a place I love visiting. When I want to get into the 'zone' for fiction writing.	7	2	0	1	1	0	1	0	1	0	0	0	-77	-77	-77	-77	-77	-77	-77	7	7	7	7	7	7	6	5	7	7	28	22	24	22	2	4.5	6	2.5	7
23	2	India	India	4	1	Melodious,Classical,Party music	-99	3	3	Mostly, when I'm sad either I prefer melodious(soothing,lively,romantic) songs or no songs at all to divert my sadness.	2	3	0	1	1	0	0	0	0	0	0	0	-77	-77	-77	-77	-77	-77	-77	1	4	6	6	5	5	4	4	5	2	18	15	26	13	2.5	5	7	6	5.5
52	1	UK	UK	4	1	Classical only	-99	3	5	It's more to do with choosing the composer or the genre (baroque, romantic, etc.) than choosing it because it evokes sadness	3	4	0	0	0	0	0	0	0	0	0	1	-77	-77	-77	-77	-77	-77	-77	2	5	4	4	4	5	4	4	4	3	12	15	18	10	5.5	5	6	4.5	5
28	2	India	India	4	2	classical/ rock/ hip hop	-99	7	7	sitting alone in my room, surfing the internet	7	6	0	1	1	0	1	0	1	0	0	0	-77	-77	-77	-77	-77	-77	-77	7	7	7	7	7	7	7	7	6	5	23	20	24	12	1.5	5.5	4	4	6.5
30	2	Singapore	India	3	2	Folk and popular music	Harmonium	3	6	When things doesn't work out as I want it to be ..	6	4	0	1	1	0	0	0	0	0	0	0	-77	-77	-77	-77	-77	-77	-77	3	3	3	3	3	2	3	2	2	2	17	14	22	10	5.5	5	6	6	5.5
26	2	India	India	4	1	pop, rock, club, soft, trance	-99	3	4	after a fight, something goes wrong	5	5	0	1	0	0	1	0	0	0	0	0	-77	-77	-77	-77	-77	-77	-77	6	4	5	6	5	4	5	4	4	7	28	22	22	16	4.5	6.5	3.5	7	5.5
30	2	Canada	India	4	1	Instrumental and Bollywood	-99	3	3	When I am feeling lonely and I need to be understood	3	2	0	1	0	0	0	1	0	0	1	0	-77	-77	-77	-77	-77	-77	-77	6	6	6	6	6	6	6	6	6	6	11	16	17	14	1	6	5.5	3.5	4.5
24	2	India	India	3	1	Western classical, Rock	-99	3	6	Feeling low, having relationship trouble.	5	2	1	1	1	0	0	0	1	1	0	0	4	7	6	5	5	6	4	5	5	4	6	4	7	6	6	5	5	21	15	22	13	3.5	5.5	6	4.5	6
23	1	India	India	3	1	Progressive Metal	Guitar	5	5	-99	2	6	0	0	1	0	1	0	1	1	0	0	-77	-77	-77	-77	-77	-77	-77	5	6	7	7	5	6	6	6	5	6	20	11	12	2	1	4.5	2.5	7	6.5
25	1	India	India	3	1	Metal, Western and Indian Classical	Acoustic guitar	4	4	There are no specific situations when i listen to 'sad' music. Sometimes it helps alleviate my mood.	3	5	0	1	1	0	1	0	1	1	1	0	-77	-77	-77	-77	-77	-77	-77	6	6	7	7	7	6	6	6	5	6	18	20	19	10	2.5	6	5	4.5	7
30	2	UK	India	4	2	rap	-99	4	2	-99	1	4	0	0	1	0	0	0	0	0	0	0	-77	-77	-77	-77	-77	-77	-77	5	4	5	6	4	4	4	5	5	6	18	18	22	12	5.5	6	2	7	5.5
24	1	US	India	4	1	Hindustani and Carnatic, western classical, rock, rock and roll.	Tabla	3	4	I do not generally listen to sad music.	2	1	0	0	1	0	0	0	0	0	0	0	-77	-77	-77	-77	-77	-77	-77	3	3	3	2	3	5	4	4	3	3	11	17	14	13	2	6.5	5.5	6	6
49	2	Germany	Germany	4	2	Jazz, Country, Rock, Folk, Pop, Classical	-99	4	2	-99	4	3	1	0	1	0	0	0	0	1	0	0	4	6	5	6	6	7	5	4	5	6	7	6	3	3	3	4	6	20	18	19	14	3.5	5	4	3.5	5
30	2	India	India	3	1	soft rock, pop	-99	2	3	-99	4	1	1	0	0	0	0	0	0	0	0	0	4	6	5	5	4	4	5	3	4	4	4	3	3	3	3	3	3	17	15	25	2	6.5	5	6	5	7
22	2	India	India	4	1	soft romantic, soft rock, Sufi	-99	2	2	unexplained low energy level and enthusiasm	2	2	0	0	0	0	1	0	0	0	0	0	-77	-77	-77	-77	-77	-77	-77	6	6	6	4	1	5	6	4	1	4	16	22	20	14	6	5	6.5	6	6
25	2	India	India	3	2	blues, soft rock, country music	Harmonium	2	7	When I feel chronically empty and purposeless. It rarely happens. But when it does, listening to certain notes helps me reach to the core of my feelings be there and after an overwhelming session, gradually come out of it.	2	1	0	0	1	0	0	0	1	0	0	0	-77	-77	-77	-77	-77	-77	-77	5	7	4	3	6	6	6	6	6	6	27	22	24	10	4	6.5	7	3.5	5
33	2	India	India	4	2	Indian film music	-99	2	2	When missing somebody, I'm not an active listener of sad music in sad situations	4	3	1	1	1	0	1	0	0	0	0	0	6	6	2	2	2	1	5	1	2	5	2	2	2	2	2	2	2	12	17	15	9	4	5	6	5.5	4.5
23	2	India	India	3	1	Semi-classical, Indian classical, Soft Rock/Alternative Rock	Voice	2	5	When I am feeling sad/mildly depressed	6	1	1	0	1	0	0	0	0	1	0	0	4	5	6	7	5	2	1	6	6	4	2	1	1	1	1	6	5	9	19	16	18	2	6.5	6.5	7	4
25	1	India	India	4	2	classical and instrumental	-99	3	3	lonely , relax mood	2	4	0	1	1	0	1	1	1	0	0	0	-77	-77	-77	-77	-77	-77	-77	6	5	6	6	7	2	2	2	6	4	14	20	18	7	4	5	4.5	7	7
26	2	India	India	3	1	gospel, rock, blues	voice, guitar	2	3	when I am upset, or feel lonely	2	1	1	0	0	0	0	0	0	0	0	0	5	5	1	4	1	5	5	1	1	1	5	1	1	6	1	1	1	6	17	24	9	5	6	6.5	5.5	6.5
24	2	India	India	4	2	-99	-99	2	4	-99	4	1	1	0	0	1	0	0	0	0	0	1	5	6	5	5	5	5	1	1	1	4	1	4	5	5	5	1	5	15	20	20	14	3	5.5	2.5	1	7
29	2	US	US	4	2	R&B, pop, motown, hip hop, rap, rock	-99	3	5	Getting into a bad argument with my boyfriend, feeling lonely, missing people who have died	5	2	1	1	1	0	1	0	1	0	0	0	6	7	6	7	4	5	7	5	6	4	5	5	5	5	5	6	5	25	14	27	16	2.5	4	5.5	1.5	6
27	2	Italy	Italy	3	1	-99	-99	2	3	-99	3	4	0	1	1	0	0	0	0	0	0	0	-77	-77	-77	-77	-77	-77	-77	5	5	6	6	5	6	5	6	5	6	16	18	18	14	4	4.5	4	4	4.5
22	1	Singapore	Singapore	4	1	Pop, Indie, House,Jazz	-99	5	6	When feeling tired or sleepy.	6	3	1	1	1	0	1	0	1	0	0	0	5	5	5	6	6	6	6	5	6	6	6	6	6	5	3	3	5	15	14	18	16	2.5	4	5.5	3.5	5.5
53	2	Spain	Spain	3	1	classical, rock, jazz.	piano	1	2	When I think about a person who die.	1	5	0	1	0	0	0	0	0	0	0	0	-77	-77	-77	-77	-77	-77	-77	6	6	1	6	7	4	4	4	1	1	24	23	23	14	2.5	7	6.5	4	6
19	2	Singapore	Singapore	4	1	Pop, Indie, Rock	Voice	5	6	When I feel lonely, when I am upset, When i feel listening to that song	4	6	1	1	0	0	0	0	0	0	0	0	6	5	7	7	6	3	4	6	5	6	3	4	5	5	4	1	2	24	18	19	14	7	4.5	1.5	4.5	6
23	2	Singapore	Singapore	4	2	RnB, hiphop, classical, rock, rap, alternative, pop punk	-99	5	6	Mostly when thinking about the past	5	4	1	1	1	0	0	0	0	0	0	0	5	7	5	4	5	4	5	2	3	4	2	2	5	5	5	1	1	24	16	23	16	6	6.5	5	6	7
56	2	Germany	Germany	3	1	Rock, Pop, Classic, Irish/Scottish/Gaelic Folkmusic	Flute	3	4	When I'm tired; or I meditate or I do Yoga.	7	4	0	1	1	0	1	0	1	0	0	0	-77	-77	-77	-77	-77	-77	-77	7	7	7	7	5	4	4	4	6	4	19	16	23	14	5.5	3.5	5.5	4.5	7
26	2	India	India	4	1	Anything from Indian film music to Western Rock.	-99	3	5	When I miss someone, when lonely, when I feel that I have become numb and am unable to feel pain/sadness, then I listen to sad music to help feel and release the pain within.	6	2	1	0	1	0	0	0	0	0	0	0	5	6	3	4	5	6	5	5	5	5	4	6	3	3	3	3	4	10	20	19	12	5	6.5	1.5	7	4
27	1	Austria	Germany	2	1	Classical, New Wave	Piano	3	3	Home alone in the evening	4	4	0	0	1	0	1	0	0	0	0	0	-77	-77	-77	-77	-77	-77	-77	5	6	6	5	4	3	3	3	5	5	17	18	21	9	3.5	3.5	6.5	5	6
31	2	UK	Greece	4	1	Rock	Piano	4	6	I find sad music quite soothing, and I believe some of the best music written can be described as sad. I do not necessarily have to be in a sad mood to want to listen to sad music. It can be very uplifting.But I do actively seek to listen to relax	6	5	1	1	1	0	1	0	0	1	0	0	5	7	7	6	7	7	6	6	7	4	6	4	5	5	4	6	5	20	18	27	23	2	6.5	3.5	3	7
20	2	Singapore	Singapore	3	1	Pop, Classical	Piano	4	6	Tend to listen to more sad music when facing break ups or arguments.	5	2	1	0	1	0	0	0	0	0	0	0	7	6	4	7	3	5	4	3	2	2	2	2	5	5	5	2	2	26	13	25	21	2.5	5	3	2.5	1
30	1	India	India	3	1	western classical , western rock, indian classical,	voice, piano, guitar, dotara( indian string instrument)	6	2	any time, sad music has nothing to do with sadness.	1	7	0	0	1	0	1	1	1	1	0	0	-77	-77	-77	-77	-77	-77	-77	4	6	2	7	7	7	7	4	6	2	10	23	18	5	1	6.5	4.5	4	7
29	1	India	India	4	2	melodies	-99	2	2	usually i wont listen sad music, but i would see in movies	1	1	1	1	0	1	0	0	0	0	0	0	7	6	4	4	7	4	4	4	5	5	5	6	6	5	5	5	4	16	13	16	18	3.5	4.5	4	4.5	3.5
36	2	India	India	3	1	Soul, classical, instrumental, contemporary	voice	2	5	When I want to relive certain past memories and cannot share them with anyone	3	2	0	1	1	0	0	0	0	0	0	0	-77	-77	-77	-77	-77	-77	-77	1	3	4	4	4	7	6	6	4	2	24	21	22	18	3	6.5	4	3	6.5
28	1	India	India	3	1	Western and Eastern Classical	Violin	6	7	When I am alone..specifically no 1 with me..	7	3	0	1	0	0	1	0	1	0	0	0	-77	-77	-77	-77	-77	-77	-77	6	5	7	7	7	7	7	7	6	7	17	14	16	7	4	4.5	7	5.5	7
21	2	Singapore	Malaysia	3	1	-99	Piano	4	5	-99	6	4	0	1	1	0	1	0	1	0	0	0	-77	-77	-77	-77	-77	-77	-77	4	4	3	4	4	5	4	5	5	5	17	14	18	15	3.5	5	4	5.5	4.5
34	1	Australia	India	4	1	instrumental, relaxation music, soft romantic numbers	-99	4	5	While contemplating and introspecting.	5	3	1	1	1	0	1	0	1	0	0	0	6	6	6	6	6	6	6	6	6	6	6	6	6	6	6	6	6	13	17	27	16	3	7	3.5	4.5	4
22	2	Singapore	Singapore	3	2	Kpop	-99	4	6	The feeling of nostalgia, wanting to reminisce about the past that is often related to sad music. The warmness received from listening to sad songs.	5	3	1	1	1	0	1	0	0	1	0	0	5	6	6	6	4	6	6	4	5	7	5	5	7	7	7	6	6	25	14	24	16	5	4.5	3.5	6	4.5
25	1	India	India	4	1	soft romantic music, classical, rap, rock , pop etc	-99	3	6	when i think of the girl i love and i had screwed up due to some issues, i feel to listen to some sad music..	6	3	0	1	0	0	1	1	0	0	0	0	-77	-77	-77	-77	-77	-77	-77	4	6	6	7	7	6	6	5	4	6	17	15	13	14	5	5	3.5	5.5	5.5
19	1	India	Czech Republic	3	2	Psychedelic Jazz and Indian Music	Didgeridoo and Violin	4	3	When i am alone and i think of some past event which was not really happening for me.	5	2	0	1	1	0	0	0	0	0	0	0	-77	-77	-77	-77	-77	-77	-77	5	6	4	6	3	5	5	5	2	6	21	10	11	15	3	3	4	4	4
26	1	India	India	4	1	Classical	-99	5	7	In rainy days, in a lonely afternoon, at late night grasping my pillow, when I'm sitting beside a river whatever the time is. specially when I introspecting..	3	5	0	1	1	0	1	1	1	0	0	0	-77	-77	-77	-77	-77	-77	-77	6	7	7	6	7	4	4	4	4	4	27	15	18	14	3.5	4.5	6.5	5	5.5
35	1	India	India	4	1	Indian and Western Classics, Jazz, Hip pop, Pop, Electronic, Rock	-99	1	1	-99	1	2	0	0	1	0	0	0	0	0	0	0	-77	-77	-77	-77	-77	-77	-77	4	4	4	4	4	5	5	5	4	4	14	16	16	14	4	4	4	4	4
29	1	India	India	4	1	Classical, country/folk, pop, devotional, contemporary experiments...	Mouth-organ, keyboard & guitar (very little capacity to play these all)	5	7	It may be that when I am exhausted, I prefer a sad or nearly sad music (for example: Beethoven's 'Romances', 'Fur Elise'...) as it supports me spiritually with its soothing quality. May be late at night (11.30 PM), with the summer breeze blowing	7	5	1	1	1	0	1	0	1	0	0	0	7	7	6	6	4	4	6	6	6	6	4	7	4	4	4	5	6	21	14	21	17	2	4.5	2.5	2	6
32	2	India	India	4	2	MELODIES	-99	6	1	-99	1	6	0	0	0	0	1	0	0	0	0	0	-77	-77	-77	-77	-77	-77	-77	5	7	5	6	7	1	1	1	1	1	6	20	23	7	2	6	6	3.5	6.5
22	1	Austria	Austria	3	1	Rock	Piano	5	5	When being sad	6	4	1	0	0	0	1	0	0	0	0	0	4	5	6	6	6	4	5	6	6	6	6	5	4	4	4	5	6	23	22	21	11	3.5	4.5	5.5	5	6
59	1	Germany	Germany	2	1	any kind	guitar	3	5	thinking about a lost lover	5	2	0	1	1	0	1	0	0	0	0	0	-77	-77	-77	-77	-77	-77	-77	6	4	5	6	4	2	1	1	1	1	10	24	23	4	3	6.5	6.5	7	7
38	2	US	US	4	1	Pop, Alternative, Rock	-99	1	7	When I went through a breakup.	4	1	1	0	0	0	0	0	0	0	0	0	7	7	7	7	7	7	7	1	1	1	5	7	6	6	6	7	7	23	26	28	16	7	7	7	4	7
27	2	India	India	4	2	Popular music	-99	4	7	Basically remembering people and moments that are no longer part of my life	7	2	0	0	0	0	1	0	0	0	0	0	-77	-77	-77	-77	-77	-77	-77	7	7	6	7	7	5	5	5	2	6	21	23	26	18	3	6	6.5	3.5	5.5
28	1	India	India	4	1	Country	-99	4	6	Alone at home/missing someone	5	2	0	1	1	0	1	0	1	0	0	0	-77	-77	-77	-77	-77	-77	-77	4	4	6	6	4	6	3	6	2	6	13	16	19	9	6.5	5.5	5.5	6	5
30	2	UK	India	4	2	Ghazals (indian blues) old bollywood from 1940's to 80's era, jazz, blues	-99	4	3	When I am sad and struggling to bring it out/cry it out, music helps trigger that. Also, sad songs lyrics are more evocative and poignant so I enjoy listening to sad songs just for the poetry of the lyrics.	4	5	1	1	1	0	0	0	0	1	0	0	3	4	6	6	3	6	5	3	4	4	3	5	5	5	3	1	3	16	18	19	13	6.5	6.5	3.5	5.5	4
27	1	India	India	4	2	Classic Rock, but open to other genres as well	-99	6	3	-99	1	6	0	0	0	0	1	0	1	1	0	0	-77	-77	-77	-77	-77	-77	-77	1	2	1	2	6	7	7	6	5	7	26	20	18	3	2	2.5	7	5.5	6.5
26	1	UK	India	4	1	Alternative Rock, Classical Indian, Classical Western, Pop, Bollywood, World	-99	2	6	Worried about incidents in different parts of the world Personal incidents (bad day at work, fight with a friend etc)	5	4	0	0	1	0	1	0	1	0	0	0	-77	-77	-77	-77	-77	-77	-77	6	4	6	2	4	4	4	5	4	5	13	19	19	9	1	7	6	6.5	4.5
28	1	US	India	4	1	Down-tempo electronic	Violin	5	6	-99	4	6	0	0	1	0	1	0	0	0	0	0	-77	-77	-77	-77	-77	-77	-77	4	5	3	4	5	4	4	4	3	5	17	20	16	13	1	6	2	6	3
28	1	India	India	3	1	Post Rock, Space Rock, Alternative, Indie	Guitar	5	7	- Stress arising out of situations beyond my control - Professional stress or failure - Existential pangs	7	5	1	0	1	0	1	0	0	0	0	0	3	6	5	6	4	6	4	5	7	6	6	3	6	6	6	1	2	20	17	16	7	3.5	5	5	6	6
36	2	US	US	3	1	Indie/Electronic	Flute	5	7	Riding the train, cycling home at night, writing papers	6	4	1	1	1	0	1	0	1	1	0	0	2	7	5	5	3	6	3	4	5	5	7	6	5	4	3	3	5	22	21	23	6	5.5	6	5.5	6	6
26	1	US	India	4	1	Classic Rock and Qawallis	-99	6	6	Homesickness and whenever I think about ex girlfriends	6	2	0	1	1	0	1	1	1	0	0	0	-77	-77	-77	-77	-77	-77	-77	7	7	1	5	5	6	7	5	7	7	13	17	13	16	4	5	4	4.5	4.5
27	2	India	India	4	1	Indie, Electronic	-99	4	6	after a long day at work; weekends	6	4	0	0	1	0	1	0	0	0	0	0	-77	-77	-77	-77	-77	-77	-77	6	4	6	7	7	1	1	1	1	1	7	9	20	20	3	4.5	3	3.5	4.5
27	1	India	India	4	2	classical indian, club music and rock	-99	3	1	if the song is melodious and has quirks interlaced in it which encourages you to attempt singing it.	1	4	0	0	0	0	0	0	0	0	0	0	-77	-77	-77	-77	-77	-77	-77	2	5	5	4	4	1	1	1	1	5	24	12	21	6	4.5	7	1	4.5	5.5
22	1	India	India	4	2	rock	-99	3	5	-99	4	3	0	0	1	0	0	0	0	0	0	0	-77	-77	-77	-77	-77	-77	-77	5	6	4	4	4	5	4	6	4	4	15	14	14	14	2.5	4	4	4	4
21	2	UK	France	3	1	Classical, contemporary classical, world music, jazz	double bass	3	4	-99	5	5	0	0	1	0	0	0	0	1	0	0	-77	-77	-77	-77	-77	-77	-77	5	6	6	6	5	3	3	3	1	2	15	17	6	10	4.5	4	5	7	7
27	1	UK	Russia	4	1	Electronic, mainly techno; post rock; can enjoy pretty much anything	voice	6	3	Happy music just somehow seems to be of inferior quality or depth on average, compared to sad music. I don't seek to listen to sad music in bad times, because there's a risk of its making me feel even worse.	3	5	1	0	1	0	1	0	1	0	0	0	1	1	3	7	3	2	7	6	4	6	6	4	3	3	3	4	4	15	21	20	16	1.5	5.5	2.5	3.5	6
38	1	India	India	4	2	Hindi songs	-99	3	6	when I am disheartened or gloomy.	6	3	0	1	0	0	1	0	0	0	0	0	-77	-77	-77	-77	-77	-77	-77	7	7	6	6	6	5	4	4	5	5	8	18	18	7	3.5	6.5	7	7	4
32	2	Germany	Germany	3	1	Soul, R&B, Pop, Jazz	voice	3	6	- someone I know died - something didn't work out the way I wanted it to - I miss someone/something	5	3	1	1	1	0	1	0	1	0	0	0	7	7	7	7	7	7	7	5	6	6	5	3	4	4	4	7	6	22	22	25	16	3	6.5	5.5	6	6.5
19	2	US	US	3	1	Classic rock, pop, Contemporary Christian	Flute/Piccolo	3	5	When I have a bad day I listen to sad music because it fits my mood.	6	4	1	0	1	0	1	0	0	1	0	0	7	7	3	5	4	6	7	6	7	6	6	5	3	5	2	5	2	28	22	18	11	1.5	6.5	6.5	5.5	6.5
24	1	India	India	2	1	Rock ClassicRock AlternativeRock PostRock House Trance	Guitar Vocals	1	1	I don't seek out sad music.	1	1	0	0	1	0	1	1	1	1	1	0	-77	-77	-77	-77	-77	-77	-77	4	5	5	5	6	6	5	5	4	4	20	17	16	11	5	4	5.5	5	6.5
22	2	Canada	Canada	4	1	Rock, Indie	Piano	3	6	When I'm feeling really depressed, after finishing a sad movie or book, if i've had a downer of a day.	6	3	1	0	1	1	0	0	0	0	0	0	6	6	7	6	6	5	5	3	4	6	6	6	4	4	4	3	5	17	8	10	14	1	5	4.5	2.5	5.5
18	2	US	US	2	2	Pop, country	Voice and piano	4	7	After a break up Needing a quiet comforting moment When im relaxing	5	3	0	1	0	0	1	1	1	1	0	0	-77	-77	-77	-77	-77	-77	-77	7	3	7	7	5	2	2	2	6	5	26	16	25	8	6	6.5	6	6.5	6.5
23	2	US	US	4	1	Rock, pop, country, alternative and rap.	-99	5	7	Break ups, fights, emotional situations.	6	4	1	1	0	0	1	0	0	0	0	0	6	7	7	7	7	7	4	2	3	4	5	2	4	7	7	6	4	14	9	19	13	6.5	4	5.5	1.5	4.5
