# Supplementary material for: The Paradox of Music-Evoked Sadness: An Online Survey
Source: PLoS One. 2014 Oct 20;9(10):e110490. doi: 10.1371/journal.pone.0110490 (PMC4203803; doi:10.1371/journal.pone.0110490)
Supplement: Table S1 — List of items of the questionnaire on sad music listening habits (third section of the survey). (PDF) [file pone.0110490.s002.pdf]

**Table S1. List of items of the questionnaire on sad music listening habits (third section of the survey).**

| Item                                    | Item Text                                                                                                     |
|-----------------------------------------|---------------------------------------------------------------------------------------------------------------|
| Frequency of listening to sad music     | How often do you actively select sad music to listen to?                                                      |
| Importance of situation-related factors | How much do specific situations influence your choice to listen to sad music?                                 |
| Example of situation-related factors    | Could you write down one or more examples of situations in which you engage with sad music and why?           |
| Mood-congruent liking of sad music      | When I am in a sad mood I like to listen to sad music.                                                        |
| Mood-incongruent liking of sad music    | When I am in a positive mood I like to listen to sad music.                                                   |
| Emotions evoked by sad music: Sadness   | Sad music makes me feel sad or sorrowful.                                                                     |
| Tenderness                              | Sad music makes me feel tender, affectionate or in love.                                                      |
| Nostalgia                               | Sad music makes me feel nostalgic, dreamy or melancholic.                                                     |
| Tension                                 | Sad music makes me feel tense, agitated or nervous.                                                           |
| Peacefulness                            | Sad music makes me feel serene, calm or soothed.                                                              |
| Joyful Activation                       | Sad music makes me feel joyful, amused or bouncy.                                                             |
| Transcendence                           | Sad music makes me feel fascinated or overwhelmed and evokes in me feelings of transcendence or spirituality. |
| Wonder                                  | Sad music makes me feel filled with wonder, dazzled or moved.                                                 |
| Power                                   | Sad music makes me feel strong, triumphant or energetic.                                                      |
| Any emotion                             | Sad music does not evoke in me any particular emotion.                                                        |
